# Supplementary material for: UK consensus definitions for necrotising otitis externa: a Delphi study
Source: PubMed Central journal article supplement — BMJ Open. 2023 Feb 20;13(2):e061349. doi: 10.1136/bmjopen-2022-061349 (PMC9945308; doi:10.1136/bmjopen-2022-061349), 2023-02-20

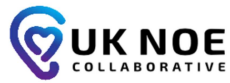

## DELPHI ROUND 1 – RESULTS FEBRUARY 2019 Response Rate: 84% (74/93)

### Part 1: DEFINITE NOE

A true case of DEFINITE NOE will have the following features

1a. Symptoms: MAJOR symptoms - necessarily present for all definite cases of NOE: \*

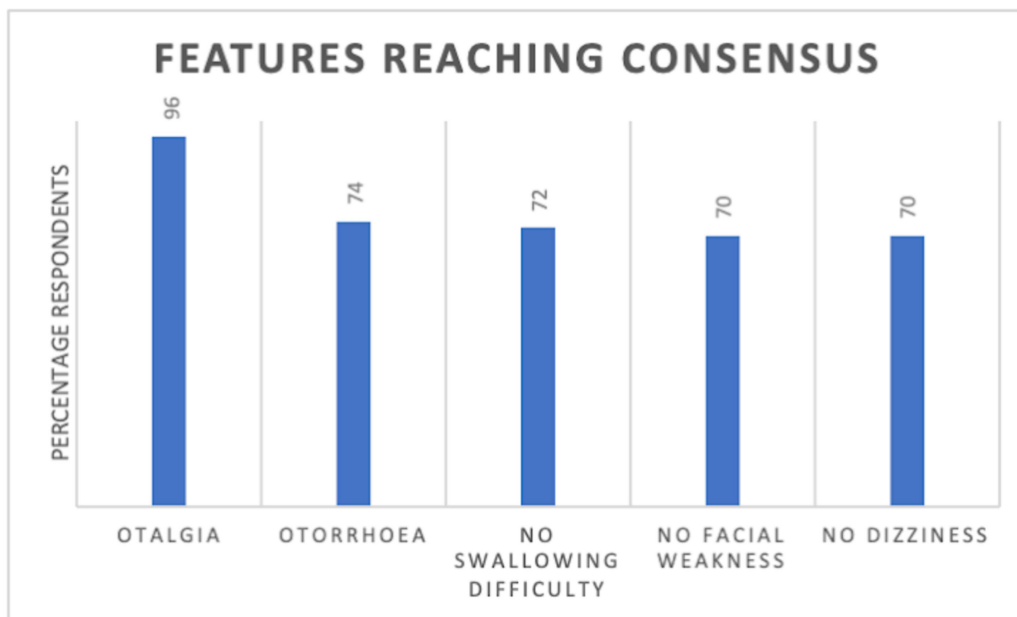

1b. Symptoms: MINOR symptoms - which MAY be present for all definite cases of NOE: \*

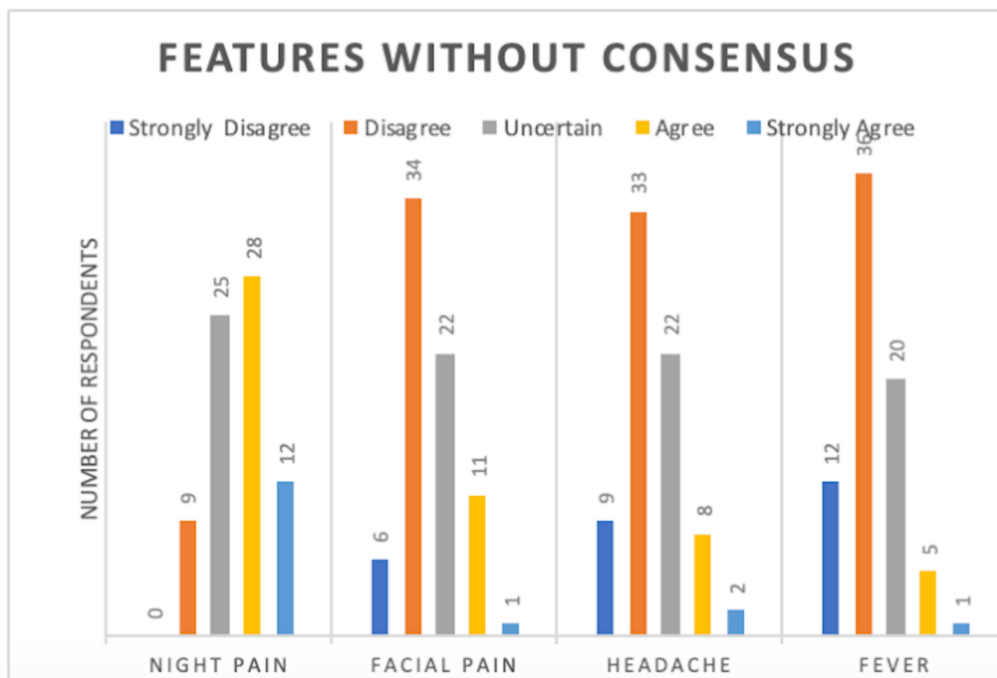

2. A true case of DEFINITE NOE will have the following clinical signs: \*

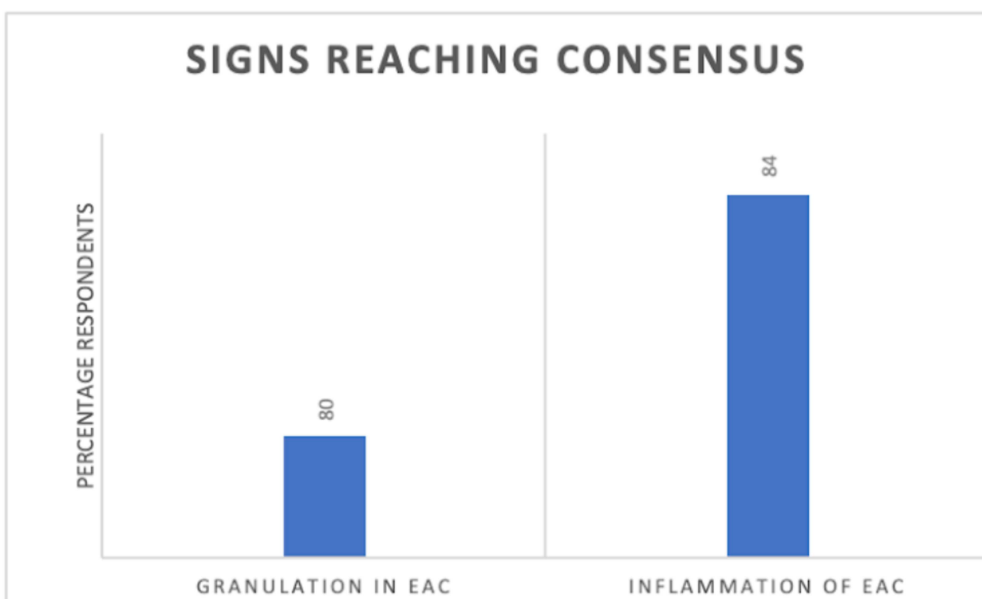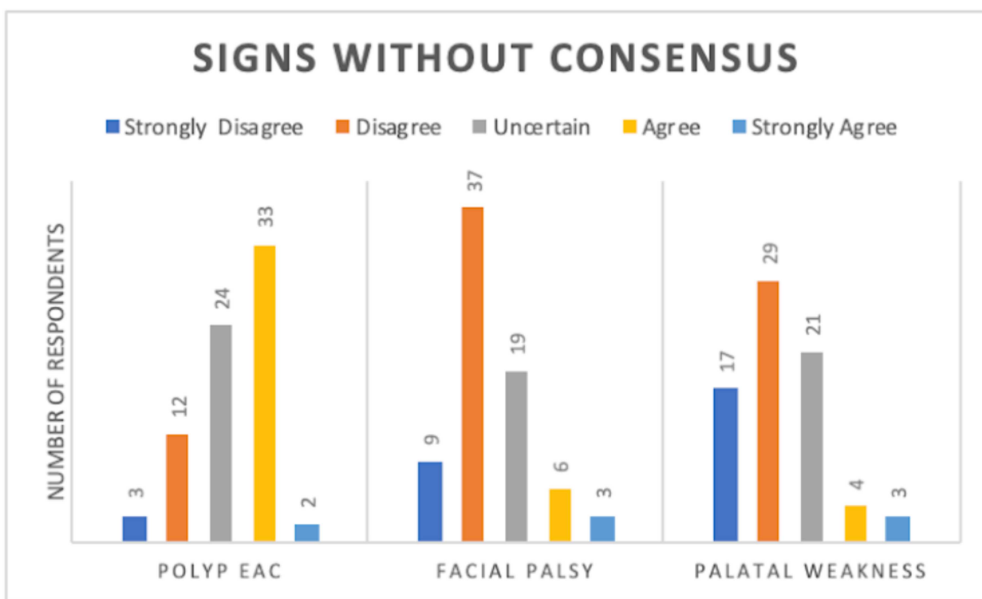

3. A true case of DEFINITE NOE will have the following findings on imaging: \*

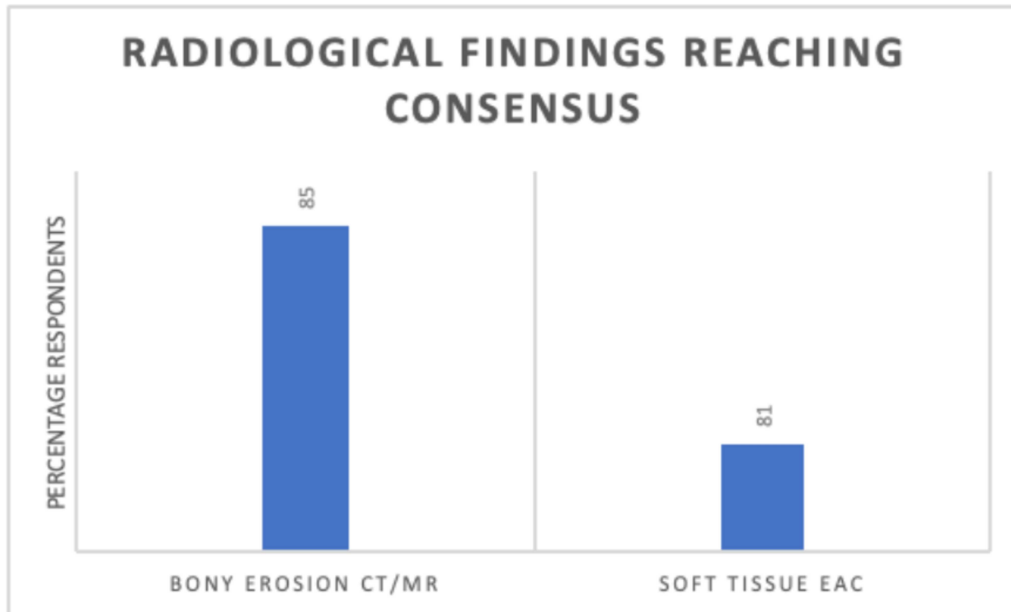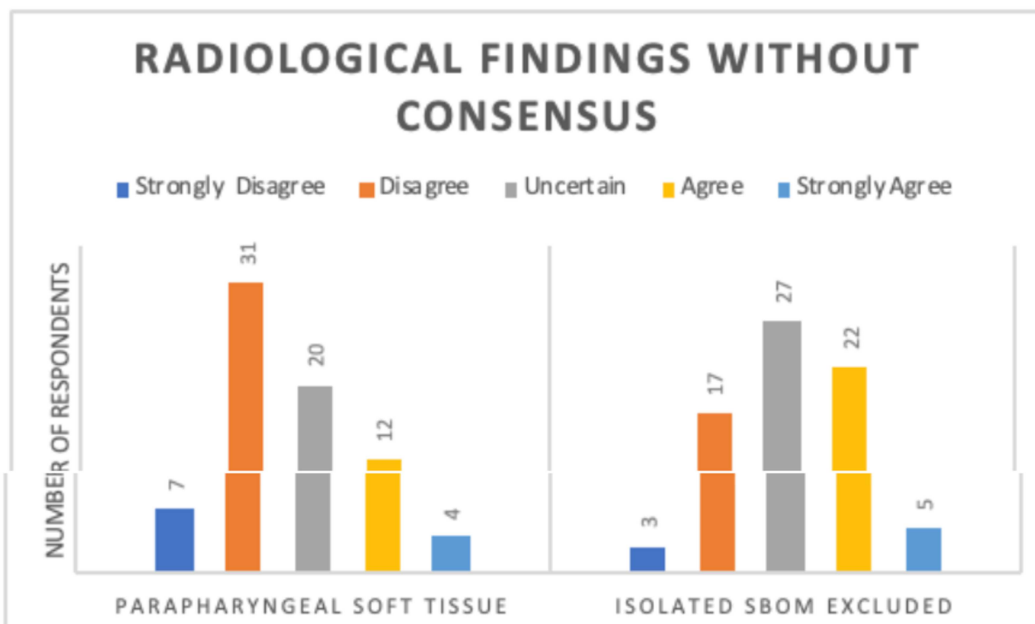

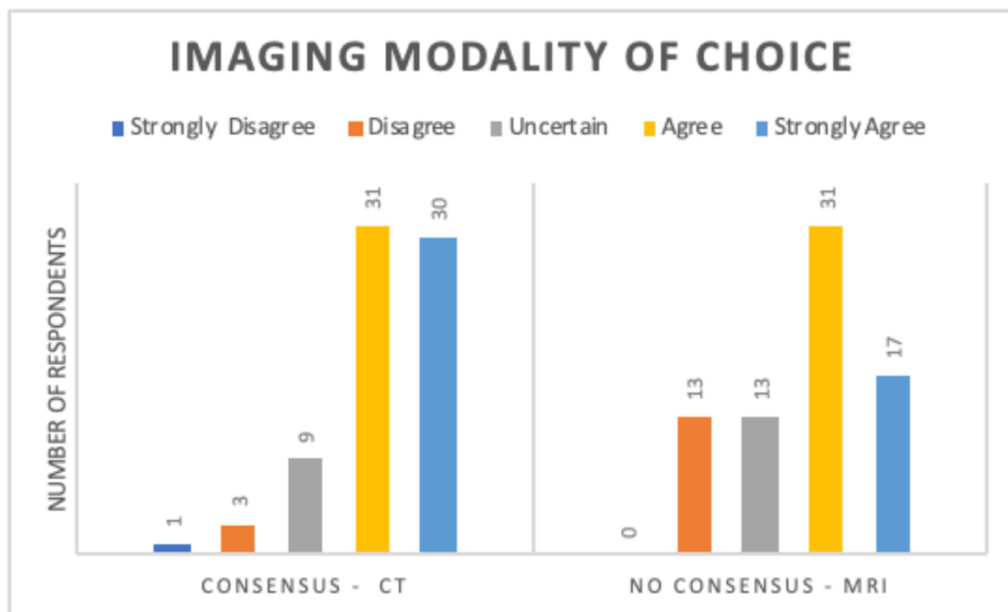

4a. INVESTIGATION: A true case of DEFINITE NOE will have the following findings on histology: \*

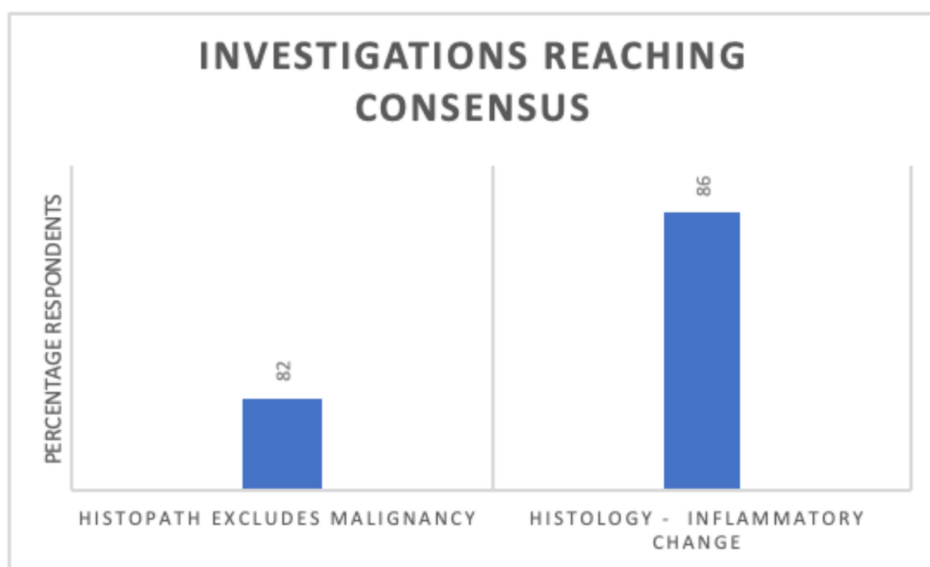

4b. INVESTIGATION: A true case of DEFINITE NOE will have the following biochemistry/haematology findings: \*

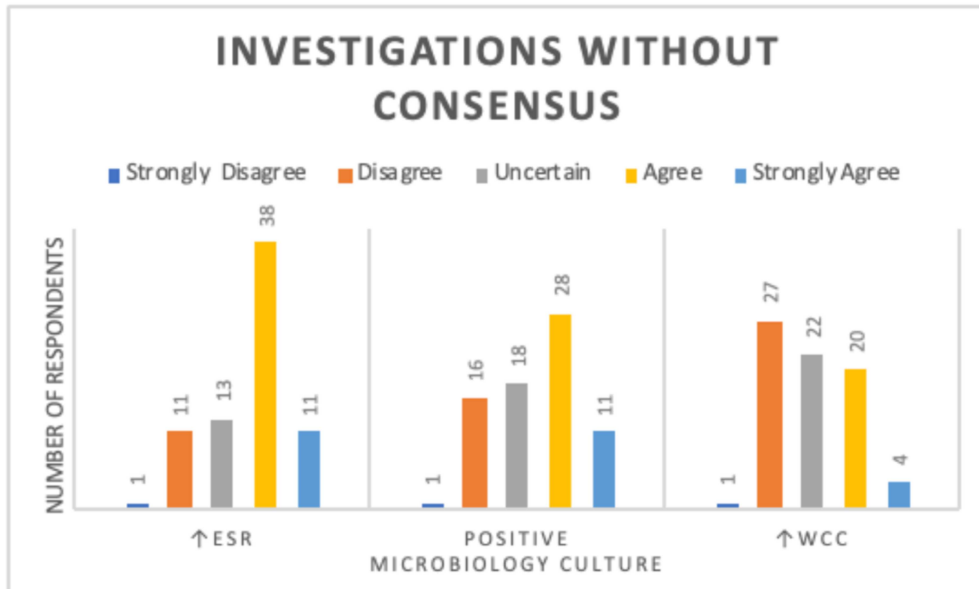

5. Regarding risk factors for DEFINITE NOE: \*

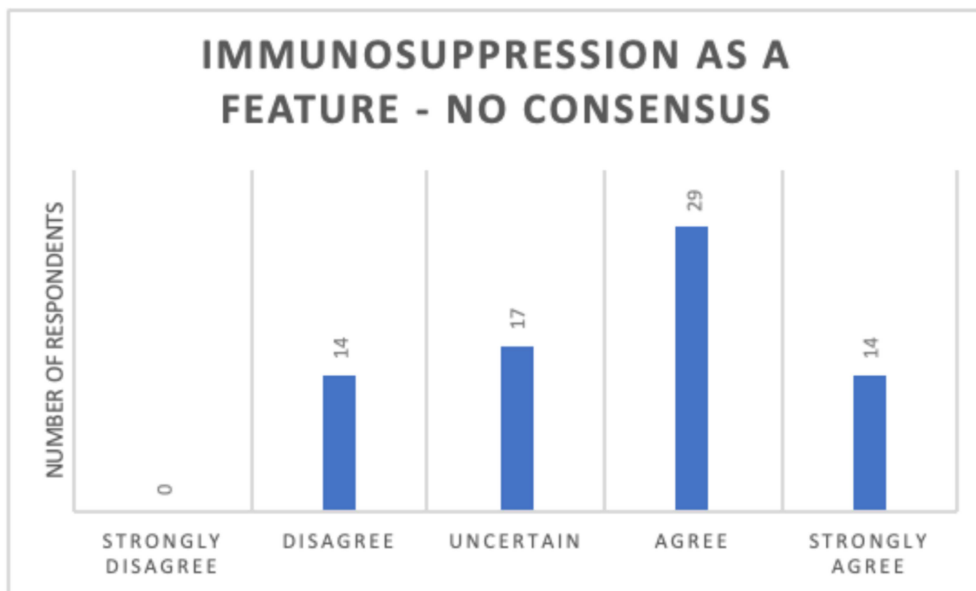

**Part 2: Clinical Diagnosis & Investigation of Cases of PROBABLE NOE**

This definition covers those cases that do not meet ALL the criteria for definite NOE, but needs to be differentiated from severe OE. They are not the cases in whom further testing is awaited, but this constitutes a final diagnosis. This definition is important because it will impact antibiotic management.

A true case of probable NOE will have the following features:

13. 1a. Symptoms: MAJOR symptoms - necessarily present for all probable cases of NOE: \*

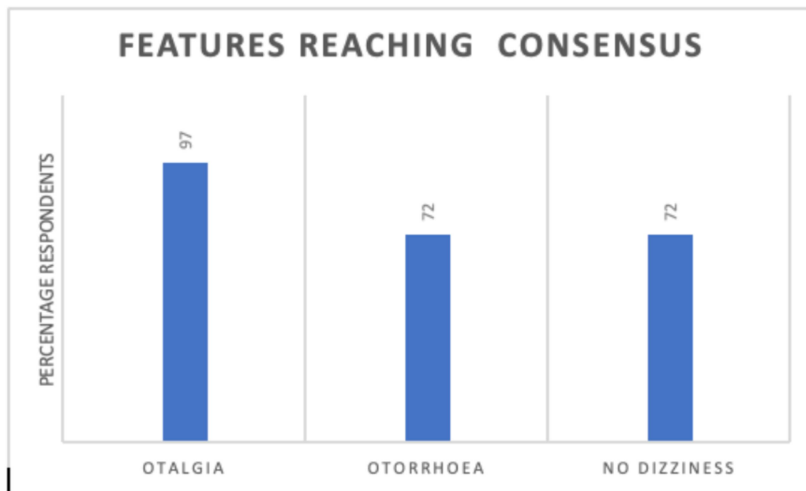

- 1b. Symptoms: MINOR symptoms - which MAY be present for all probable cases of NOE: \*

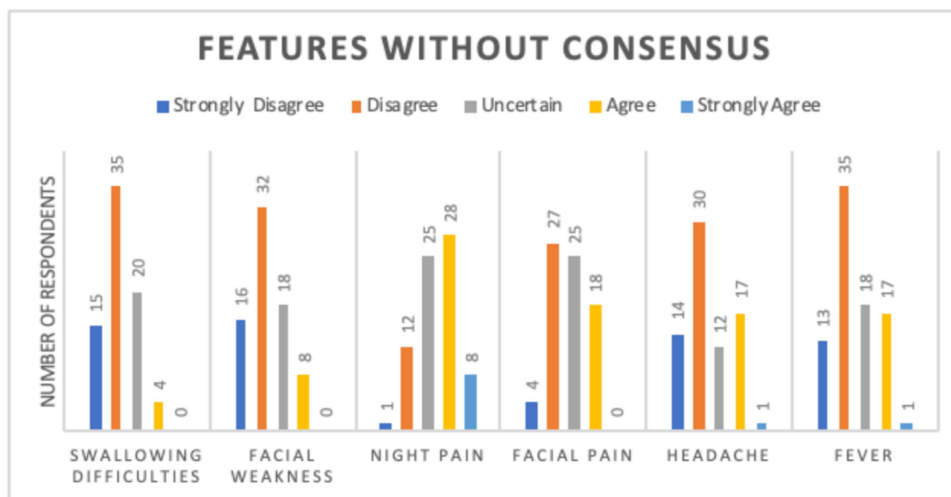

2. A case of PROBABLE NOE will have the following clinical signs: \*

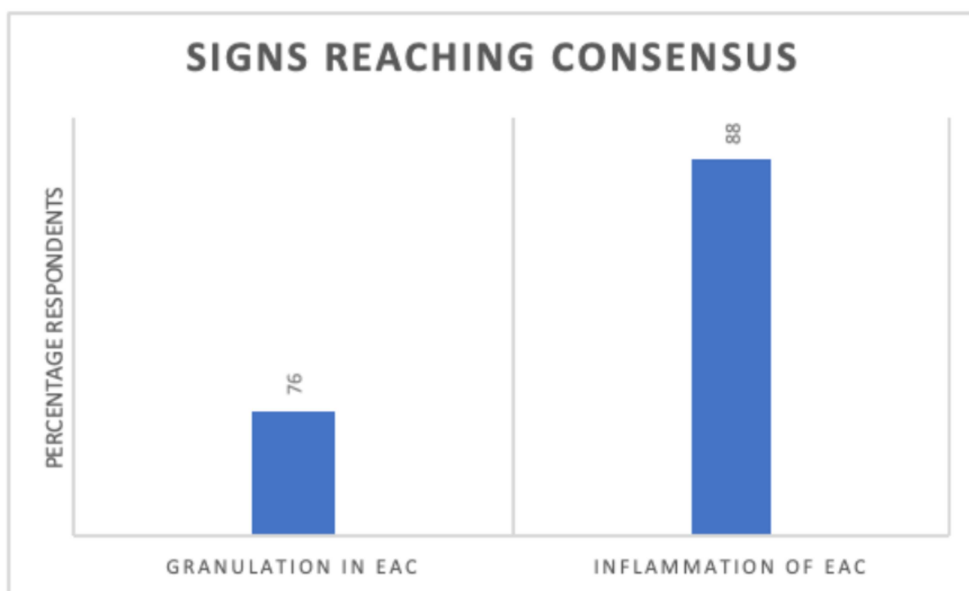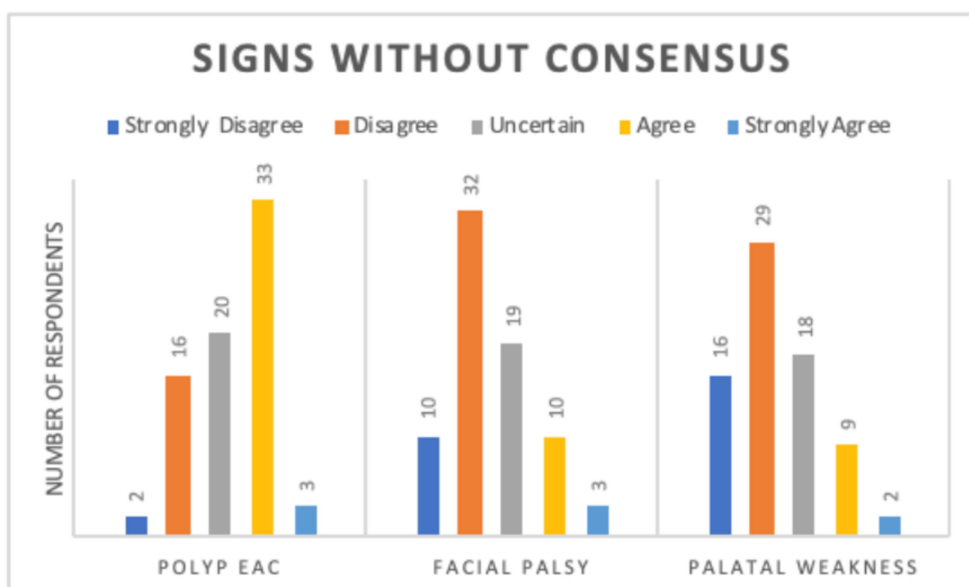



3. A case of PROBABLE NOE will have the following findings on imaging: \*

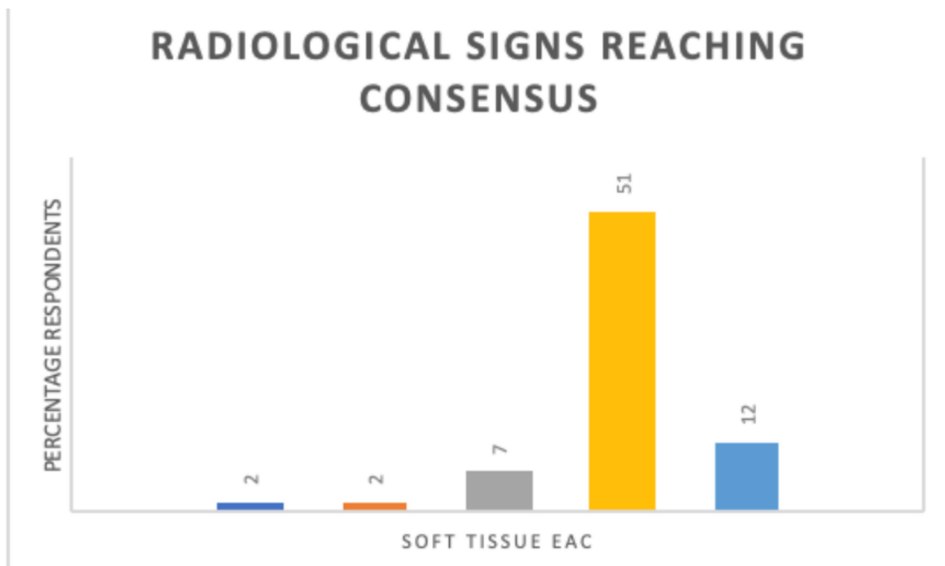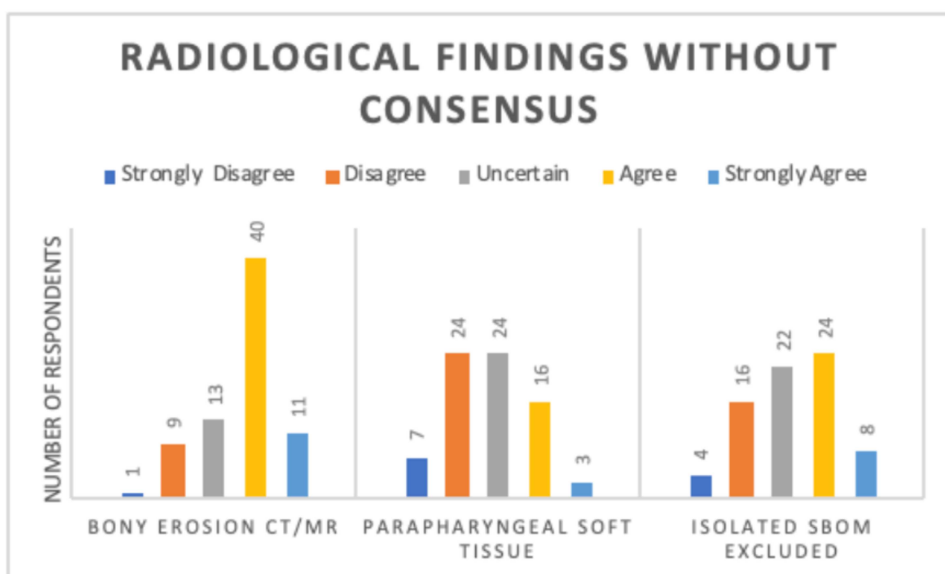

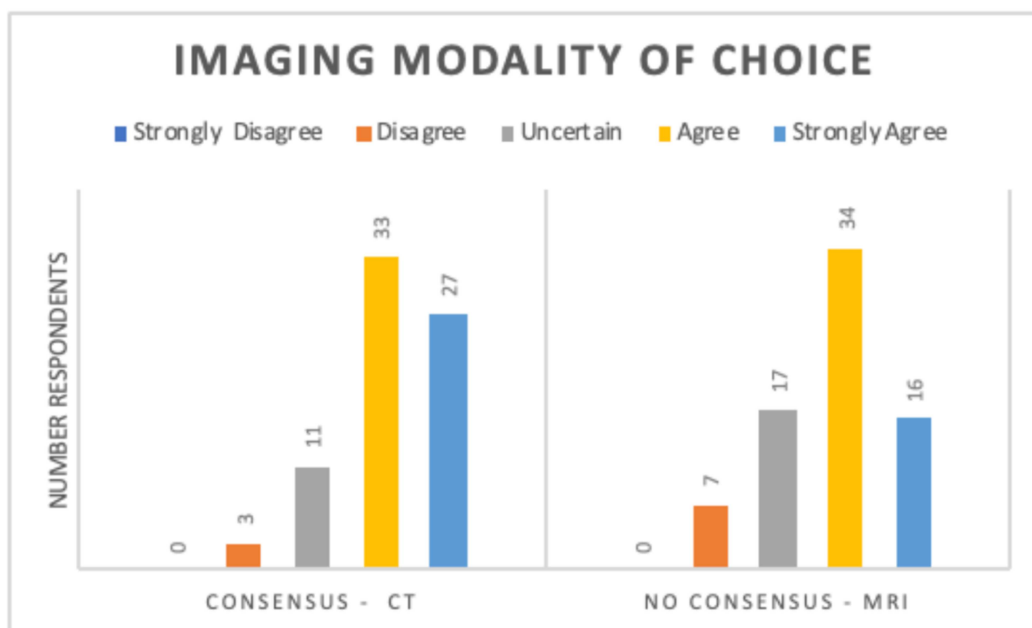

4a. INVESTIGATION: A case of PROBABLE NOE will have the following findings on histolog

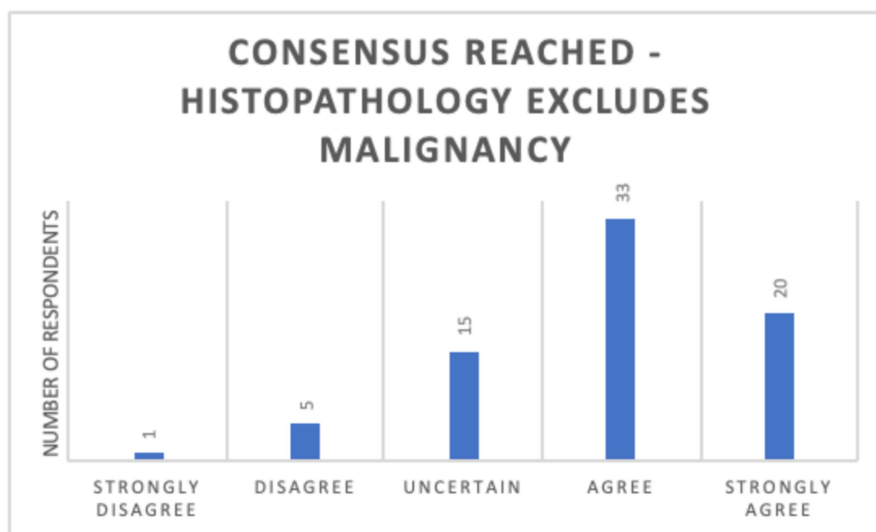

4b. INVESTIGATION: A case of PROBABLE NOE will have the following biochemistry/haematology findings: \*

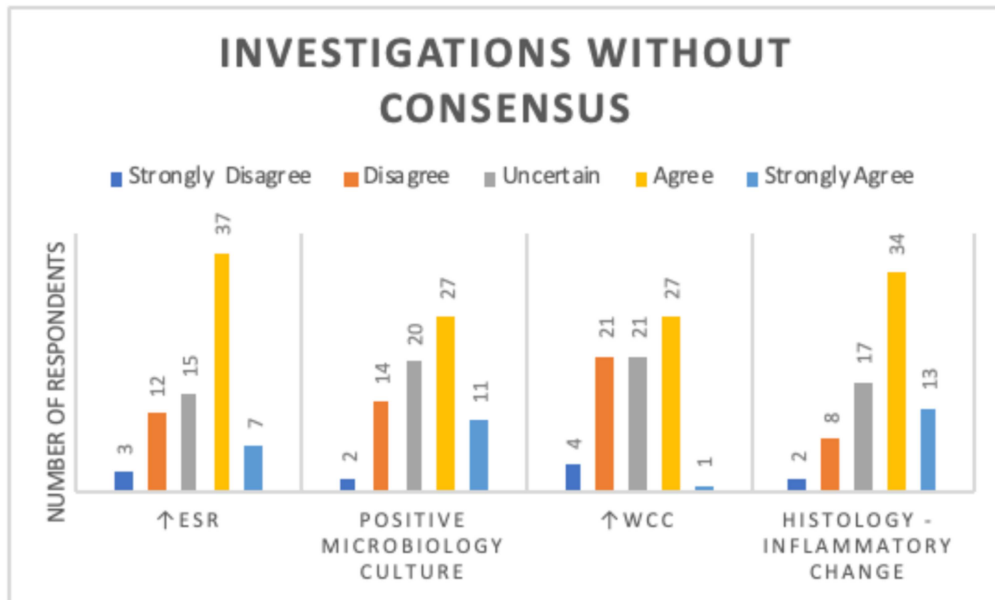

5. Regarding risk factors for PROBABLE NOE: \*

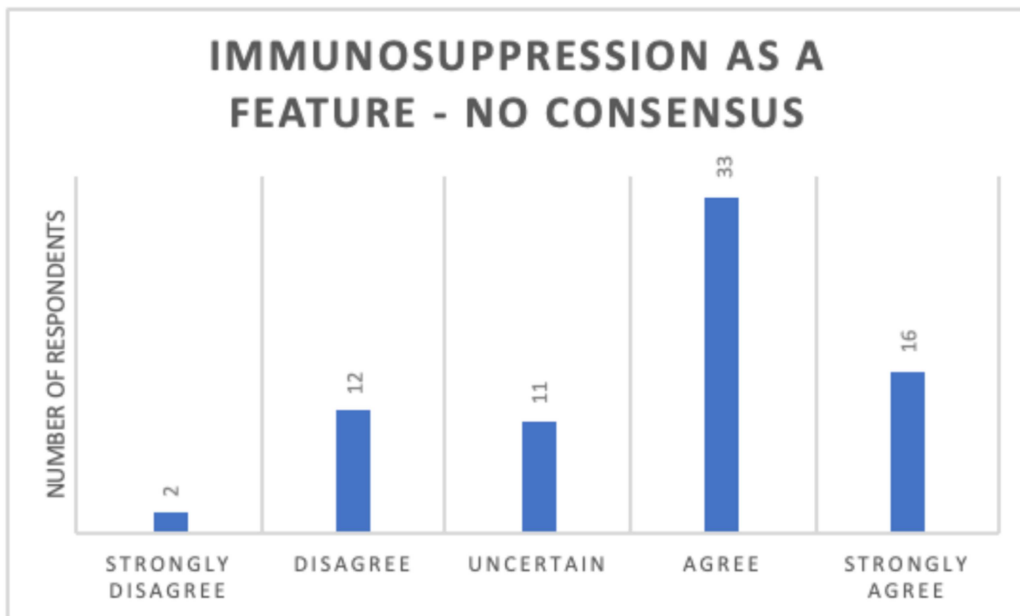

1. Which of the following features present in a definite case of NOE would meet criteria for severe disease? \*

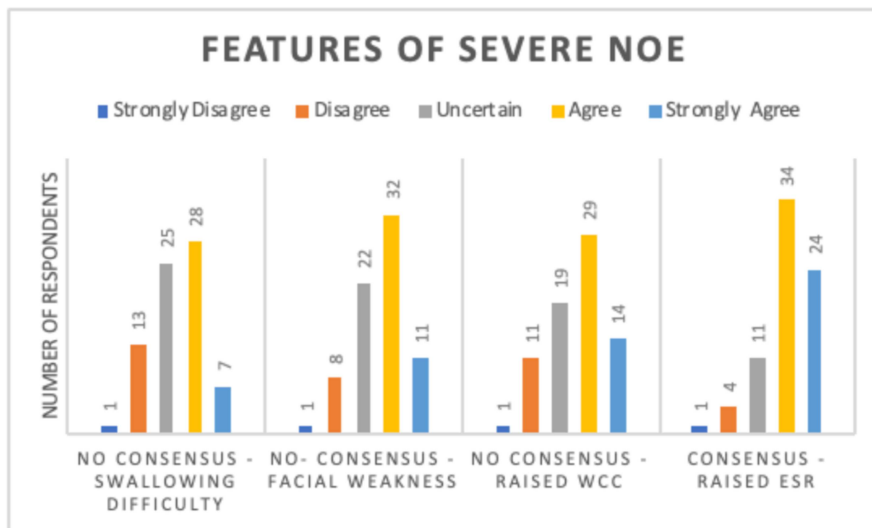

**Part 4:  
Diagnosis  
of  
RELAPSED  
NOE**

In order to better understand treatment failure, we need to understand what constitutes a true relapsed case. This should be differentiated from 'a case with progressive disease'. A relapsed case is a case where the patient has responded to treatment and the treatment course has been completed.

The following questions will try to ascertain what should define a relapsed case of Necrotising Otitis Externa

**1. The following SYMPTOMS suggest a relapsed case: \***

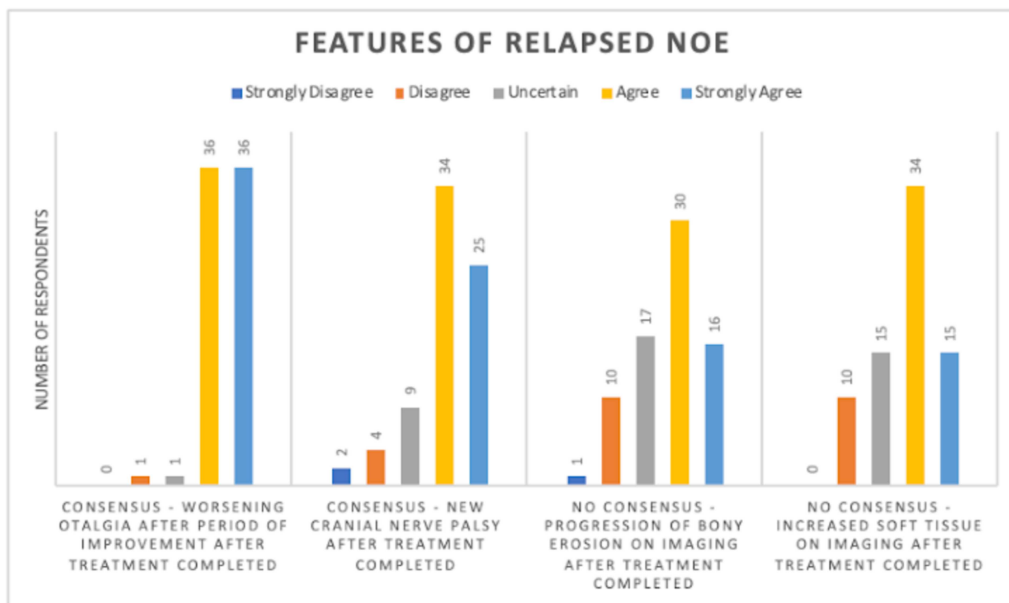

**3. Regarding imaging: \***

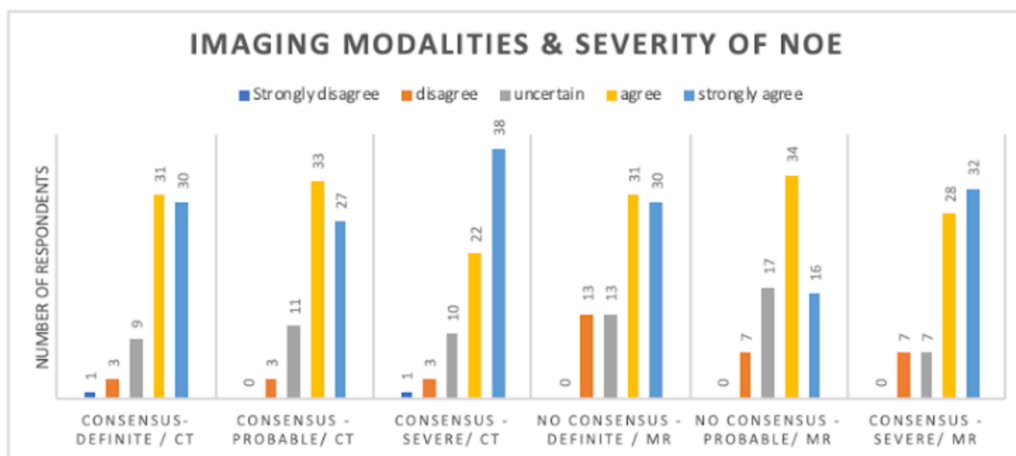

Supplement: bmjopen-2022-061349supp001.pdf [file bmjopen-2022-061349supp001.pdf]
