# Supplementary material for: UK consensus definitions for necrotising otitis externa: a Delphi study
Source: PubMed Central journal article supplement — BMJ Open. 2023 Feb 20;13(2):e061349. doi: 10.1136/bmjopen-2022-061349 (PMC9945308; doi:10.1136/bmjopen-2022-061349), 2023-02-20
Supplement: bmjopen-2022-061349.draft_revisions.pdf [file bmjopen-2022-061349.draft_revisions.pdf]

# BMJ Open

BMJ Open is committed to open peer review. As part of this commitment we make the peer review history of every article we publish publicly available.

When an article is published we post the peer reviewers' comments and the authors' responses online. We also post the versions of the paper that were used during peer review. These are the versions that the peer review comments apply to.

The versions of the paper that follow are the versions that were submitted during the peer review process. They are not the versions of record or the final published versions. They should not be cited or distributed as the published version of this manuscript.

BMJ Open is an open access journal and the full, final, typeset and author-corrected version of record of the manuscript is available on our site with no access controls, subscription charges or pay-per-view fees (<http://bmjopen.bmj.com>).

If you have any questions on BMJ Open's open peer review process please email [info.bmjopen@bmj.com](mailto:info.bmjopen@bmj.com)

# BMJ Open

## Necrotising Otitis Externa: Multidisciplinary consensus definitions

|                               |                                                                                                                                                                                                                                                                                                                                                                                                                                                                                                                                                                                                                                                                                                                                                                                                                                                                                       |
|-------------------------------|---------------------------------------------------------------------------------------------------------------------------------------------------------------------------------------------------------------------------------------------------------------------------------------------------------------------------------------------------------------------------------------------------------------------------------------------------------------------------------------------------------------------------------------------------------------------------------------------------------------------------------------------------------------------------------------------------------------------------------------------------------------------------------------------------------------------------------------------------------------------------------------|
| Journal:                      | <i>BMJ Open</i>                                                                                                                                                                                                                                                                                                                                                                                                                                                                                                                                                                                                                                                                                                                                                                                                                                                                       |
| Manuscript ID                 | bmjopen-2022-061349                                                                                                                                                                                                                                                                                                                                                                                                                                                                                                                                                                                                                                                                                                                                                                                                                                                                   |
| Article Type:                 | Original research                                                                                                                                                                                                                                                                                                                                                                                                                                                                                                                                                                                                                                                                                                                                                                                                                                                                     |
| Date Submitted by the Author: | 05-Feb-2022                                                                                                                                                                                                                                                                                                                                                                                                                                                                                                                                                                                                                                                                                                                                                                                                                                                                           |
| Complete List of Authors:     | Hodgson, Susanne; University of Oxford<br>Khan, M. M.; Central Manchester University Hospitals NHS Foundation Trust<br>Patrick-Smith, Maia; University of Oxford<br>Martinez-Devesa, P; John Radcliffe Hospital, Department of ENT<br>Stapleton, Emma; Central Manchester University Hospitals NHS Foundation Trust, Department of Otolaryngology<br>Williams, O Martin; University Hospitals Bristol and Weston NHS Foundation Trust, Department of Microbiology<br>Pretorius, Pieter; John Radcliffe Hospital, Department of Neuroradiology<br>McNally, Martin; Oxford University Hospitals NHS Foundation Trust<br>Nuffield Orthopaedic Centre, Nuffield Orthopaedic centre<br>Andersson, Monique; Oxford University Hospitals NHS Foundation Trust, Microbiology; Oxford University Hospitals NHS Foundation Trust, on behalf of UK NOE Collaborative, . . ; University of Oxford |
| Keywords:                     | MICROBIOLOGY, INFECTIOUS DISEASES, OTOLARYNGOLOGY, RADIOLOGY & IMAGING                                                                                                                                                                                                                                                                                                                                                                                                                                                                                                                                                                                                                                                                                                                                                                                                                |
|                               |                                                                                                                                                                                                                                                                                                                                                                                                                                                                                                                                                                                                                                                                                                                                                                                                                                                                                       |

SCHOLARONE™  
Manuscripts

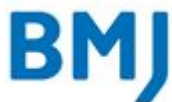

I, the Submitting Author has the right to grant and does grant on behalf of all authors of the Work (as defined in the below author licence), an exclusive licence and/or a non-exclusive licence for contributions from authors who are: i) UK Crown employees; ii) where BMJ has agreed a CC-BY licence shall apply, and/or iii) in accordance with the terms applicable for US Federal Government officers or employees acting as part of their official duties; on a worldwide, perpetual, irrevocable, royalty-free basis to BMJ Publishing Group Ltd ("BMJ") its licensees and where the relevant Journal is co-owned by BMJ to the co-owners of the Journal, to publish the Work in this journal and any other BMJ products and to exploit all rights, as set out in our [licence](#).

The Submitting Author accepts and understands that any supply made under these terms is made by BMJ to the Submitting Author unless you are acting as an employee on behalf of your employer or a postgraduate student of an affiliated institution which is paying any applicable article publishing charge ("APC") for Open Access articles. Where the Submitting Author wishes to make the Work available on an Open Access basis (and intends to pay the relevant APC), the terms of reuse of such Open Access shall be governed by a Creative Commons licence – details of these licences and which [Creative Commons](#) licence will apply to this Work are set out in our licence referred to above.

Other than as permitted in any relevant BMJ Author's Self Archiving Policies, I confirm this Work has not been accepted for publication elsewhere, is not being considered for publication elsewhere and does not duplicate material already published. I confirm all authors consent to publication of this Work and authorise the granting of this licence.

## Necrotising Otitis Externa: multidisciplinary consensus definitions

Hodgson SH<sup>1,2,3</sup>, Khan M<sup>\*4</sup>, Patrick-Smith M<sup>5</sup>, Martinez-Devesa P<sup>6</sup>, Stapleton E<sup>4</sup>, Williams M<sup>7,8</sup>, Pretorius PM<sup>9</sup>, McNally MA<sup>10</sup>, Andersson MI<sup>1,11§^</sup> on behalf of the UK NOE Collaborative

*\*These authors contributed equally.*

<sup>1</sup>Department of Microbiology and Infectious Diseases, Oxford University Hospitals NHS Foundation Trust, John Radcliffe Hospital, Headley Way, Oxford, OX3 9DU, UK

<sup>2</sup>Jenner Institute, Nuffield Department of Medicine, University of Oxford, Old Road Campus, Off Roosevelt Drive, Churchill Hospital, Headington, Oxford, OX3 7DQ, UK

<sup>3</sup>Department of Biochemistry, University of Oxford, South Parks Road, Oxford, OX1 3QU, UK

<sup>4</sup>Department of ENT, Manchester University Hospitals NHS Foundation Trust, Manchester Royal Infirmary, Oxford Road, Manchester, M13 9WL, UK

<sup>5</sup>University of Oxford Clinical Medical School, University of Oxford, John Radcliffe Hospital, Headley Way, Oxford, OX3 9DU, UK

<sup>6</sup>Department of ENT, Oxford University Hospitals NHS Foundation Trust, John Radcliffe Hospital, Headley Way, Oxford, OX3 9DU, UK

<sup>7</sup>Department of Infection, University Hospitals Bristol and Weston NHS Foundation Trust, Marlborough Street, Bristol, Avon, BS1 3NU, UK

<sup>8</sup>Public Health England Microbiology Services Bristol, Bristol Royal Infirmary, Upper Maudlin Street, Bristol, BS2 8HW, UK

<sup>9</sup>Department of Neuroradiology, Oxford University Hospitals NHS Foundation Trust, John Radcliffe Hospital, Headley Way, Oxford, OX3 9DU, UK

<sup>10</sup>Bone Infection Unit, Oxford University Hospitals NHS Foundation Trust, Windmill Road, Headington, Oxford OX3 7HE, UK

<sup>11</sup>Nuffield Division of Clinical Laboratory Science, Radcliffe Department of Medicine, University of Oxford, John Radcliffe Hospital, Headley Way, Oxford, OX3 9DU, UK

§Corresponding author:  
Dr Monique Andersson

1  
2  
3 44 Email: [monique.andersson@ouh.nhs.uk](mailto:monique.andersson@ouh.nhs.uk)  
4 45 Telephone: +447476220225  
5 46 Oxford University Hospitals NHS Foundation Trust  
6 47 Department of Microbiology and Infectious Diseases  
7 48 John Radcliffe Hospital  
8 49 Headley Way  
9 50 Oxford  
10 51 OX3 9DU  
11 52 United Kingdom  
12  
13  
14  
15  
16  
17

### 18 56 UK NOE Collaborative

- 19 57
- 20 58 • Chris Aldren, Consultant in ENT Surgery, NHS Frimley Health Foundation Trust
  - 21 59 Victoria Alexander, Consultant in ENT Surgery, St George's University Hospitals NHS Trust and
  - 22 60 Epsom
  - 23 61 and St Helier University Hospitals NHS Trust
  - 24 62 • Fiona Andrewartha, Consultant in Infection, Nottinghamshire Healthcare NHS Foundation Trust
  - 25 63 • Helen Atkinson, Specialist trainee in ENT Surgery, Yorkshire and Humberside deanery
  - 26 64 • Manohar Bance, Consultant in ENT Surgery, Cambridge University Hospitals NHS Foundation
  - 27 65 Trust
  - 28 66 • Rupan Banga, Consultant in ENT Surgery, University Hospitals Birmingham NHS Foundation Trust
  - 29 67 • David Baring, Consultant in ENT Surgery, NHS Lothian, Edinburgh
  - 30 68 • Tim Beale, Consultant Radiologist, University College London Hospitals NHS Foundation Trust
  - 31 69 • Alex Bennett, Consultant in ENT Surgery, NHS Lothian, Edinburgh
  - 32 70 • Ian Bottrill, Consultant in ENT Surgery, Oxford University Hospitals NHS Foundation Trust
  - 33 71 • F Kay Seymour, Consultant in ENT Surgery, Barts Health NHS Trust
  - 34 72 • Philip Clamp, Consultant in ENT Surgery, University Hospitals Bristol and Weston NHS
  - 35 73 Foundation Trust
  - 36 74 • Julia Colston, Consultant in Infection, Kings College Hospital NHS Foundation Trust
  - 37 75 • Tumena Corrah, Consultant in Infection, London North West University Healthcare NHS Trust
  - 38 76 • Lucy Dalton, Specialist Trainee in ENT Surgery, University Hospitals Birmingham NHS Foundation
  - 39 77 Trust
  - 40 78 • Sudip Das, Consultant in ENT Surgery, University Hospitals of Leicester NHS Trust
  - 41 79 • Eoghan deBarra, Consultant in Infection, Beaumont Hospital, Royal College of Surgeons in
  - 42 80 Ireland Hospital Group, Dublin, Ireland.
  - 43 81 • Jane Democratis, Consultant in Infection, NHS Frimley Health Foundation Trust
  - 44 82 • Reena Dwivedi, Consultant Radiologist, Salford Royal NHS Foundation Trust
  - 45 83 • Chi Eziefula, Consultant in Infection, Brighton and Sussex University Hospitals NHS Trust
  - 46 84 • Susannah Froude, Consultant in Infection, University Hospital of Wales
  - 47 85 • Mark Gilchrist, Consultant Pharmacist, Imperial College Healthcare NHS Trust
  - 48 86 • Laura Harrison, Specialist Trainee in ENT Surgery, Oxford University Hospitals NHS Foundation
  - 49 87 Trust
  - 50 88 • Mary Hart, Consultant Radiologist, University Hospital of Wales
- 51  
52  
53  
54  
55  
56  
57  
58  
59  
60

*UK Definitions for NOE*

- 1  
2  
3 89 • Carolyn Hemsley, Consultant in Infection, Guys and St Thomas' NHS Foundation Trust  
4 90 • Michael Hopkins, Specialist Trainee in ENT Surgery, NHS Lothian, Edinburgh  
5 91 • Alex Howard, Consultant in Infection, Liverpool University Hospitals NHS Foundation Trust  
6 92 • Harriet Hughes, Consultant in Infection, University Hospital of Wales  
7 93 • Arun Iyer, Consultant in ENT Surgery, NHS Greater Glasgow and Clyde  
8 94 • Susan Jawad, Consultant Radiologist, University College London Hospitals NHS Foundation Trust  
9 95 • Gwennan Jones, Specialist Trainee in Infection, University Hospital of Wales  
10 96 • Nicola Jones, Consultant in Infection, Oxford University Hospitals NHS Foundation Trust  
11 97 • Gillian Jones, Consultant in Infection, Brighton and Sussex University Hospitals NHS Trust  
12 98 • Hala Kanona, Specialist Trainee in ENT Surgery, University College London Hospitals NHS  
13 99 Foundation Trust  
14 100 • Gerard Kelly, Consultant in ENT Surgery, Leeds Teaching Hospitals NHS Trust  
15 101 • B Nirmal Kumar, Consultant ENT Surgery, Wrightington Wigan & Leigh NHS Foundation Trust  
16 102 • Steven Laird, Consultant in Infection, Coventry and Warwickshire Partnership NHS Trust  
17 103 • Pankaj Lal, Consultant in Infection, Liverpool University Hospitals NHS Foundation Trust  
18 104 • Martin Llewelyn, Consultant in Infection, Brighton and Sussex University Hospitals NHS Trust  
19 105 • Simon K Lloyd, Consultant in ENT Surgery, Manchester University Hospitals NHS Foundation  
20 106 Trust  
21 107 • Sarah Logan, Consultant in Infection, University College London Hospitals NHS Foundation Trust  
22 108 • Sam Mackeith, Consultant in ENT Surgery, Oxford University Hospitals NHS Foundation Trust  
23 109 • Philippa Matthews, Consultant in Infection, Oxford University Hospitals NHS Foundation Trust  
24 110 • Martin McNally, Consultant in Orthopaedic Surgery, Oxford University Hospitals NHS Foundation  
25 111 Trust  
26 112 • Nishchay Mehta, Consultant in ENT Surgery, University College London Hospitals NHS  
27 113 Foundation Trust  
28 114 • Tamara Mitchell, Consultant in Infection, Sheffield Teaching Hospitals NHS Foundation Trust  
29 115 • Hassan Mohammed, Specialist Trainee in ENT Surgery, Newcastle Hospital NHS Foundation Trust  
30 116 • Peter Monksfield, Consultant in ENT Surgery, University Hospitals Birmingham NHS Foundation  
31 117 Trust  
32 118 • Daniel Moualed, Consultant in ENT Surgery, Great Western Hospital NHS Foundation Trust  
33 119 • Rupert Obholzer, Consultant in ENT Surgery, Guys and St Thomas' NHS Foundation Trust  
34 120 • John Phillips, Consultant in ENT Surgery, Norfolk and Norwich University Hospitals NHS  
35 121 Foundation Trust  
36 122 • Peter Rea, Consultant in ENT Surgery, University Hospitals of Leicester NHS Trust  
37 123 • Elisabeth Ridgway, Consultant in Infection, Sheffield Teaching Hospitals NHS Foundation Trust  
38 124 • Philip Robinson, Consultant in ENT Surgery, University Hospitals Bristol and Weston NHS  
39 125 Foundation Trust  
40 126 • Shakeel R. Saeed, Consultant in ENT Surgery, The Royal National Throat, Nose and Ear Hospital  
41 127 and National Hospital for Neurology and Neurosurgery, London  
42 128 • Georgios Sakaglannis, Consultant in ENT Surgery, University Hospitals of Leicester NHS Trust  
43 129 • Frances Sanderson, Consultant in Infection, Imperial College Healthcare NHS Trust  
44 130 • Victoria Sinclair, Specialist Trainee ENT Surgery, Oxford University Hospitals NHS Foundation  
45 131 Trust  
46 132 • Avind Singh, Consultant ENT Surgery, London North West University Healthcare NHS Trust  
47 133 • Wendy Smith, Consultant in ENT Surgery, Kettering General Hospital NHS Foundation Trust  
48 134 • Dominic StLeger, Consultant Radiologist, Manchester University Hospitals NHS Foundation Trust  
49  
50  
51  
52  
53  
54  
55  
56  
57  
58  
59  
60

- 1  
2  
3 135 • David Summers, Consultant Radiologist, NHS Lothian, Edinburgh  
4 136 • Rebecca Sutherland, Consultant in Infection, NHS Lothian, Edinburgh  
5 137 • Andrew Swift, Consultant in ENT Surgery, Liverpool University Hospitals NHS Foundation Trust  
6 138 • Aaron Trinidad, Consultant in ENT Surgery, Southend University Hospital NHS Trust  
7 139 • Matthew Trotter, Consultant in ENT Surgery, University Hospital Coventry and Warwickshire  
8 140 NHS Trust  
9 141 • Michael Wareing, Consultant in ENT Surgery, Barts Health NHS Trust  
10 142 • Glen Watson, Consultant in ENT Surgery, Sheffield Teaching Hospitals NHS Foundation Trust  
11 143 • Martin Williams, Consultant in Infection, University Hospitals Bristol and Weston NHS  
12 144 Foundation Trust  
13 145 • Mandy Williams, Consultant Radiologist, University Hospitals Bristol and Weston NHS  
14 146 Foundation Trust  
15 147 • Tom Wilson, Consultant in ENT Surgery, Leeds and York Partnership NHS Foundation Trust  
16 148 • Ding Yang, Consultant in ENT Surgery, University College London Hospitals NHS Foundation Trust  
17 149 • Phil Yates, Consultant in ENT Surgery, Newcastle Hospital NHS Foundation Trust  
18 150 • Ahmed Youssef, Consultant in ENT Surgery, Liverpool University Hospitals NHS Foundation Trust  
19 151 • Ivan Zammit, Consultant Radiologist, Newcastle Hospital NHS Foundation Trust  
20  
21  
22  
23  
24  
25

26 155 Keywords: Necrotising, malignant, otitis externa, Pseudomonas, antimicrobial  
27 156

28 157 Word count: 2463  
29 158  
30 159  
31 160  
32 161  
33 162  
34 163  
35 164  
36 165  
37 166  
38 167  
39 168  
40 169  
41 170  
42 171  
43 172  
44 173  
45 174  
46 175  
47 176  
48 177  
49 178  
50 179  
51 180  
52 181  
53  
54  
55  
56  
57  
58  
59  
60

1  
2  
3 182  
4 183 **ABSTRACT**  
5 184  
6 185 **Objective:** To establish consensus definitions for NOE to facilitate the diagnosis and exclusion of  
7  
8  
9 186 NOE in clinical practice and expedite future high-quality study of this neglected condition.  
10  
11 187 **Design:** The work comprised of a systematic review of the literature, five iterative rounds of  
12  
13 188 consultation via a Delphi process and open discussion within the collaborative. An expert panel  
14  
15 189 analysed the results to produce the final outputs which were shared with and endorsed by  
16  
17 190 national speciality bodies.  
18  
19 191 **Setting:** Secondary care in the United Kingdom (UK).  
20  
21 192 **Participants:** UK clinical specialists practising in Infection, Ear Nose and Throat Surgery or  
22  
23 193 Radiology.  
24  
25 194 **Main Outcome Measures:** Definitions and statements meeting the following criteria were  
26  
27 195 accepted: (a) Minimum of 70% of respondents in agreement or strong agreement with a  
28  
29 196 definition/statement AND (b) <15% of respondents in disagreement or strong disagreement  
30  
31 197 with a definition/statement.  
32  
33 198 **Results:** Eighty UK clinicians specialising in ENT, Infection and Radiology with a special interest  
34  
35 199 in NOE took part in the work which was undertaken between 2019 and 2021. The minimum  
36  
37 200 response rate for a Round was 76%. Consensus criteria for all proposed case definitions,  
38  
39 201 outcome definitions and consensus statements were met in the fifth round.  
40  
41 202  
42  
43 203 **Conclusions:** This work distils the clinical opinion of a large group of multidisciplinary specialists  
44  
45 204 from across the UK to create practical definitions and statements to support clinical practice  
46  
47  
48  
49  
50  
51  
52  
53  
54  
55  
56  
57  
58  
59  
60



1  
2  
3 205 and research for NOE. This is the first step in an iterative process. Further work will seek to  
4  
5  
6 206 validate and test these definitions and inform their evolution.  
7

8 207  
9

### 10 208 **Strengths and Limitations**

- 13 209 • First consensus definitions for NOE from a large number of experts working in the three  
14  
15 210 different specialist areas (ENT, radiology, infection) involved in the management of this  
16  
17 211 condition
- 19 212 • These definitions are both pragmatic and useful clinically, but also stringent enough to support  
20  
21 213 further research
- 24 214 • Limitation is that these definitions are based on expert opinion. This work will provide the basis  
25  
26 215 for data generation to support an evidence based approach to definition development in the  
27  
28 216 future.  
29  
30

31 217  
32  
33

34 218 **Key words:** Necrotising, malignant, otitis, externa, Pseudomonas, antimicrobial  
35

36 219  
37  
38

39 220  
40  
41  
42  
43  
44  
45  
46  
47  
48  
49  
50  
51  
52  
53  
54  
55  
56  
57  
58  
59  
60

## 221 INTRODUCTION

222  
223 Necrotising otitis externa (NOE) is an under-recognised, poorly understood, severe infection of  
224 the external auditory canal (EAC) and lateral skull base<sup>1</sup>. If detected late, this condition has a  
225 poor outcome with spread of infection to involve the cranial nerves, the base of skull and the  
226 central nervous system<sup>2</sup>. Patients affected by NOE are generally frail and elderly with multiple  
227 co-morbidities<sup>3,4</sup>. It presents a challenge to Ear, Nose and Throat (ENT) in-patient surgical units,  
228 which are generally ill equipped to manage complex, long-stay and commonly frail medical  
229 patients. The disease is associated with high mortality; one case-series reported overall survival  
230 of 38% at 5 years with disease-specific mortality of 14%<sup>5</sup>. Early diagnosis and treatment may  
231 reduce the need for long-term antibiotic therapy and will reduce the risk of serious  
232 complications.

233  
234 No established national or international guidelines exist for the diagnosis and management of  
235 NOE<sup>6</sup>. Most published series are limited and of poor quality. Not surprisingly, the optimal  
236 strategy for diagnosis and management of NOE remains uncertain<sup>3,4</sup> and there is considerable  
237 variability in how this condition is managed<sup>7</sup>.

238  
239 Cohen and Friedman's definition of NOE from 1987 is often cited<sup>8</sup> and modified versions are  
240 used in some studies<sup>3</sup>. However, publications often fail to explicitly state their criteria for  
241 defining a case of NOE, and for those that do, there is considerable variation in the definitions  
242 applied<sup>3</sup>. To date there is no widely accepted case definition for NOE and none have been

1  
2  
3 243 developed via consensus of multidisciplinary experts. The lack of an accepted definition has  
4  
5  
6 244 impeded progress in developing diagnostic and treatment algorithms.  
7

8 245

9  
10 246 *Why is a consensus definition for NOE needed?*  
11

12  
13 247 A diagnostic definition has two distinct uses. Firstly and most importantly it provides the non-  
14  
15 248 expert clinician with a clear set of criteria to facilitate diagnosis or exclusion of NOE. Under  
16  
17 249 recognition of NOE results in a delay in diagnosis increasing the risk of serious complications  
18  
19  
20 250 and poorer outcomes in an already frail population. Conversely, given that NOE is typically  
21  
22 251 treated with prolonged courses of broad-spectrum antimicrobials, unnecessary treatment of  
23  
24  
25 252 individuals without NOE with such regimens exposes frail patients to the serious risks  
26  
27 253 associated with these agents<sup>9</sup> as well as contributing more broadly to antimicrobial resistance<sup>10-</sup>  
28  
29  
30 254 <sup>12</sup>. Accurate diagnostic processes for NOE are therefore important to optimise outcomes for  
31  
32 255 patients with and without NOE. However, to date, no test with sufficient sensitivity and  
33  
34  
35 256 specificity to definitively diagnose or exclude NOE exists, and a poor evidence base is of little  
36  
37 257 help to inform nuanced clinical decision making<sup>3,4</sup>.  
38  
39  
40

41 258 Secondly, a major limitation of the published literature on NOE is the lack of a consensus  
42  
43 259 definition for NOE. As a result, publications likely reflect heterogenous populations and robust  
44  
45  
46 260 comparison across datasets is impossible. A consensus definition is needed to facilitate future  
47  
48 261 high-quality study of the condition. For example, studies of new treatment regimens must  
49  
50  
51 262 include a robust case definition so findings can be critically appraised and applied to other  
52  
53 263 patient cohorts.  
54  
55  
56  
57  
58  
59  
60

1  
2  
3 264 *What are the aims of the definitions/statements?*  
4

5  
6 265 To be widely used and applied, consensus definitions and statements must be robust but also  
7  
8 266 practical. For example, given that many sites in the UK do not have access to urgent magnetic  
9  
10 267 resonance imaging (MRI), inclusion of this as the sole modality in a diagnostic case definition  
11  
12  
13 268 would be problematic. At the start of the project, the following aims for consensus  
14  
15 269 definitions/statements were therefore defined:

- 16  
17  
18 270 1. They should be implementable in all centres across the UK, from a small district general  
19  
20 271 hospital to tertiary referral centres.  
21  
22 272 2. They should be highly specific (i.e. describe a typical definite case of NOE and minimise  
23  
24 273 the chances of misclassifying another condition), but not necessarily describe all  
25  
26 274 potential presentations of NOE.  
27  
28 275 3. They are for guidance only and not prescriptive in terms of practice.  
29  
30 276 4. They should allow standardised description of cases to facilitate recruitment to clinical  
31  
32 277 trials and comparison of cases across different cohorts.  
33  
34 278 5. They mark the start of an iterative process – as more, and better quality evidence  
35  
36 279 becomes available these definitions/statements will be revisited and revised.  
37  
38  
39  
40  
41  
42  
43  
44

45 280

## 46 281 **METHODS**

47  
48  
49 282 This project comprised of a systematic review of the literature, five iterative rounds of  
50  
51 283 consultation via a Delphi process as well as open discussion within the collaborative. An expert  
52  
53 284 panel analysed the results to produce the final guidance (Figure 1).  
54  
55  
56  
57  
58  
59  
60

1  
2  
3 285        **(i)        Systematic Review**  
4  
5

6 286        A systematic review of the literature for NOE was performed and reported according to PRIMSA  
7  
8  
9 287        guidelines<sup>13</sup> (*Takata et al, submitted*). This revealed 422 publications, representing 16,528  
10  
11 288        patients. Sixty four percent of these publications were excluded from further analysis as they  
12  
13  
14 289        either included less than six patients and/or did not explicitly state the case definition applied.  
15  
16 290        In the studies that did describe a case definition, the criterion used varied widely. No studies  
17  
18  
19 291        specifically addressing case definition were identified. The detailed results of this review will be  
20  
21 292        published as a separate manuscript.  
22

23 293  
24  
25  
26 294        **(ii)        Delphi method**  
27  
28

29 295        A Delphi method was used to reach consensus definitions for NOE, outcome definitions and key  
30  
31  
32 296        consensus statements. The Delphi method is a structured, flexible process of obtaining  
33  
34 297        information from a group of experts by means of a series of questionnaires, each one refined  
35  
36 298        based on feedback from respondents on a previous version<sup>14</sup>. This iterative, multistage process  
37  
38  
39 299        is designed to transform opinion into group consensus, and is characterised by the following  
40  
41  
42 300        features: anonymity, allowing opinions to be expressed free from group pressure, iteration with  
43  
44 301        controlled feedback from one round to the next, aggregation of group responses and expert  
45  
46 302        input until consensus has been achieved<sup>15-17</sup>. The method is ideally suited to amalgamate the  
47  
48  
49 303        opinions of a broad range of stakeholders, which was important given the lack of high-quality  
50  
51 304        published evidence for NOE and the likely heterogenicity in practice across the UK<sup>7</sup>.  
52

53 305  
54  
55  
56  
57  
58  
59  
60

1  
2  
3 306 **(iii) Participants**  
4  
5

6 307 A core group of ENT, Infection and Radiology consultant specialists set-up the UK NOE  
7  
8 308 collaborative (MIA, ES, PP). This group, in consultation with national speciality organisations  
9  
10 309 including the British Infection Association (BIA), ENT UK and the British Society for Otolaryngology  
11  
12 310 (BSO) identified individuals with an interest in NOE, who were then invited to participate in the  
13  
14 311 Delphi process by email. The same corresponding email address was used by the collaborative  
15  
16 312 throughout the process and only one email address was used for each participant to ensure  
17  
18 313 only one response was logged for each participant at each round. The core group with other  
19  
20 314 experts (PMD, MMcN, MW) facilitated the Delphi process and analysed the data<sup>17</sup>.  
21  
22  
23  
24  
25

26 315

27  
28 316 **(iv) Definitions**  
29  
30

31 317 After a literature review, the core group proposed definitions for definite, possible and complex  
32  
33 318 NOE as well as definitions for outcomes including cure, non-response to treatment and relapse.  
34  
35 319 They also proposed key consensus statements. These definitions and statements were shared  
36  
37 320 with participants in a survey via email. Participants were asked to rate the extent to which they  
38  
39 321 agreed with each definition/statement (strongly agree, agree, disagree, and strongly disagree)  
40  
41 322 on a Likert scale. The survey included the opportunity for individuals to comment after each  
42  
43 323 definition/statement and at the end of the survey. Participants were encouraged to feed back  
44  
45 324 on their reasons for disagreement or agreement with the proposed definitions/statements.  
46  
47  
48  
49  
50

51 325  
52  
53  
54  
55  
56  
57  
58  
59  
60

1  
2  
3 326 Following each round, results were shared with participants with explanations for proposed  
4  
5  
6 327 revisions to the definitions/statements from the expert group. The Delphi process comprised of  
7  
8 328 five rounds, all of which were conducted by electronic survey apart from Round 3, which took  
9  
10 329 the form of an in-person meeting.

11  
12  
13 330

#### 14 15 331 **(v) Predefined consensus criteria**

16  
17  
18 332 The following criteria were agreed for adoption of definitions/statements<sup>18</sup>:

- 19 333 • Minimum of 70% of respondents in agreement or strong agreement with a  
20  
21 334 definition/statement AND
- 22  
23 335 • <15% of respondents in disagreement or strong disagreement with a  
24  
25 336 definition/statement.

26  
27  
28 337 Definitions/statements that met these criteria were accepted. Definitions that did not meet  
29  
30 338 these criteria at each round were modified according to feedback and included in subsequent  
31  
32 339 rounds. The Delphi process continued until consensus criteria were met for all  
33  
34 340 definitions/statements.

35  
36  
37 341

#### 38 39 342 **(vi) Wider stakeholder review**

40  
41  
42 343 The consensus case definitions/statements were shared with the BIA, ENT UK, BSO and the  
43  
44 344 British Society of Neuroradiologists (BSNR).

45  
46  
47 345

#### 48 49 346 **(vii) Ethical Approval**

*UK Definitions for NOE*

1  
2  
3 347 The approval of an ethics committee(s) or Institutional Review Board was not required as  
4  
5  
6 348 this Delphi study does not involve human subjects research. No patient data were collected  
7  
8 349 for this study, which was completely based on the feedback provided by experts regarding  
9  
10 350 NOE.

11  
12  
13 351 **(viii) Patient and Public Involvement**

14  
15  
16 352 There was no patient or public involvement in this study.  
17  
18  
19 353



1  
2  
3 354 **RESULTS**  
4

5  
6 355  
7  
8 356 Email invitations explaining the objectives of the project and including the initial survey for  
9  
10 357 Round 1 were sent to ninety-three identified specialists in the UK, of whom seventy-four  
11  
12 358 responded (80%) (Figure 2). Individuals who engaged with Round 1 were invited to participate  
13  
14 359 in Round 2. Three individuals who had not participated in Rounds 1 and 2 attended and  
15  
16 360 participated in the meeting for Round 3. Participants who had engaged in any of Rounds 1, 2 or  
17  
18 361 3 were invited to participate in Rounds 4 and 5 in addition to three individuals who has not  
19  
20 362 been involved in the process prior to Round 4. The process took more than two years to  
21  
22 363 complete, and some individuals were no longer contactable by initial email, meaning the  
23  
24 364 number of possible respondents decreased for Round 5. The minimum response rate for a  
25  
26 365 Round was 76%. The survey questions for each Round as well as facilitator communiques with  
27  
28 366 the collaborative can be accessed in Figshare. Consensus criteria for all case definitions,  
29  
30 367 outcome definitions and consensus statements were met in Round 5. These are summarised in  
31  
32 368 Tables 1, 2, 3 and 4. The final consensus definitions and statements were endorsed by the BIA,  
33  
34 369 ENT UK, BSO and BSNR.  
35  
36  
37  
38  
39  
40  
41  
42  
43  
44  
45  
46  
47  
48  
49  
50  
51  
52  
53  
54  
55  
56  
57  
58  
59  
60

1  
2  
3 375 **Table 1: Consensus definitions for NOE.** CRP = C reactive protein; ESR = erythrocyte  
4  
5  
6 376 sedimentation rate.  
7  
8  
9  
10  
11  
12  
13  
14  
15  
16  
17  
18  
19  
20  
21  
22  
23  
24  
25  
26  
27  
28  
29  
30  
31  
32  
33  
34  
35  
36  
37  
38  
39  
40  
41  
42  
43  
44  
45  
46  
47  
48  
49  
50  
51  
52  
53  
54  
55  
56  
57  
58  
59  
60

## DEFINITIONS of NOE

## DEFINITE NOE

**NOE is definitely present if ALL of the following are present:**

- Ootalgia and otorrhoea OR otalgia and a history of otorrhoea
- Granulation OR inflammation of the external auditory canal
- Histological exclusion of malignancy in cases where this is suspected
- Radiological features consistent with NOE:
  - (i) CT imaging findings of bony erosion of the external auditory canal, together with soft tissue inflammation of the external auditory canal **OR**
  - (ii) MRI with changes consistent with NOE (for example bone marrow oedema of the temporal bone with soft tissue inflammation of the external auditory canal)

## POSSIBLE NOE

**A severe infection of the external ear canal which does not show bony erosion of the external auditory canal on CT scan **OR** does not show changes consistent with NOE on MRI if this is performed (for example bone marrow oedema of the temporal bone) **AND** which has ALL of the following characteristics:**

- Ootalgia and otorrhoea OR otalgia and a history of otorrhoea AND
- Granulation OR inflammation of the external auditory canal AND
- Any of the following features
  - (i) Immunodeficiency
  - (ii) Night pain
  - (iii) Raised inflammatory markers (ESR/CRP) in absence of other plausible cause
  - (iv) Failure to respond to >2 weeks of topical anti-infectives and aural care

1  
2  
3 378 **Table 2: Definition of complex disease**  
4  
5  
6  
7  
8  
9  
10  
11  
12  
13  
14  
15  
16  
17  
18  
19  
20  
21  
22  
23  
24  
25  
26  
27  
28  
29  
30  
31  
32  
33  
34  
35  
36  
37  
38  
39  
40  
41  
42  
43  
44  
45  
46  
47  
48  
49  
50  
51  
52  
53  
54  
55  
56  
57  
58  
59  
60

For peer review only

**COMPLEX NOE**

**Patients meeting the criteria for 'definite' NOE may be classified as 'complex' (or severe) IF ANY of the following are present:**

- Facial nerve or other lower cranial nerve palsy
- Cerebral venous thrombosis seen on MRI or contrast enhanced CT
- Extensive bone involvement as demonstrated by any of the following;
  - (i) CT showing bone erosion in other skull base locations in addition to the external ear canal wall (for example around stylomastoid foramen, clivus, petrous apex, temporomandibular joint)
  - (ii) MRI showing bone marrow oedema extending to central skull-base
  - (iii) CT or MRI showing extensive soft tissue oedema or inflammation or fluid collection below the skull base
  - (iv) Intracranial spread of the disease (for example dural thickening, extradural or subdural empyema, cerebral/cerebellar abscess)

1  
2  
3 **380 Table 3: Consensus definitions for treatment outcomes**  
4

5  
6 381

7  
8 382  
9

10  
11 383  
12

13 384  
14  
15  
16  
17  
18  
19  
20  
21  
22  
23  
24  
25  
26  
27  
28  
29  
30  
31  
32  
33  
34  
35  
36  
37  
38  
39  
40  
41  
42  
43  
44  
45  
46  
47  
48  
49  
50  
51  
52  
53  
54  
55  
56  
57  
58  
59  
60

For peer review only

## OUTCOME DEFINITIONS

### CURE

A case of NOE is considered treated and cured if a patient has no pain or otorrhoea for a minimum period of 3 months after completing antibiotic therapy.

### RELAPSE OF DISEASE

Relapse is recurrence of disease after the patient has been treated and cured i.e. at least three months after stopping antibiotic therapy.

A relapsed case of NOE is a serious, invasive infection which occurs **after the initial infection was considered to be treated and cured** and is characterised by:

#### ***Recurrence of local disease***

- Recurrent otalgia OR recurrent otorrhoea  
AND
- Recurrent granulation OR inflammation  
AND
- Unchanged or progression of bony erosion of the external auditory canal on CT OR unchanged or progression of MRI changes such as bone marrow oedema of the temporal bone and soft tissue changes of the external auditory canal

#### **AND/OR**

#### ***Development or recurrence of complex disease***

- Development or worsening of a lower cranial nerve palsy, base of skull osteomyelitis or development or worsening of other intracranial complication deemed a consequence of NOE and supported by radiological imaging

### NON RESPONSE TO THERAPY

A case of NOE is defined as non-responsive to therapy if there is no improvement in otalgia or otorrhoea or inflammation or granulation tissue in the EAC after 14 days of optimum analgesia, anti-infective therapy, aural care and optimisation of immune state.

1  
2  
3 386 **Table 4: Consensus statements**  
4  
5

6 387  
7

8 388  
9  
10  
11  
12  
13  
14  
15  
16  
17  
18  
19  
20  
21  
22  
23  
24  
25  
26  
27  
28  
29  
30  
31  
32  
33  
34  
35  
36  
37  
38  
39  
40  
41  
42  
43  
44  
45  
46  
47  
48  
49  
50  
51  
52  
53  
54  
55  
56  
57  
58  
59  
60

For peer review only



1  
2  
3  
4  
5  
6  
7  
8  
9  
10  
11  
12  
13  
14  
15  
16  
17  
18  
19  
20  
21  
22  
23  
24  
25  
26  
27  
28  
29  
30  
31  
32  
33  
34  
35  
36  
37  
38  
39  
40  
41  
42  
43  
44  
45  
46  
47  
48  
49  
50  
51  
52  
53  
54  
55  
56  
57  
58  
59  
60

|                                                                                                                                                                        |
|------------------------------------------------------------------------------------------------------------------------------------------------------------------------|
| <b>CONSENSUS STATEMENTS</b>                                                                                                                                            |
| <b>FIRST LINE IMAGING</b><br>CT Scan is the initial imaging modality of choice for a suspected case of NOE                                                             |
| <b>MULTIDISCIPLINARY APPROACH</b><br>Once a diagnosis of definite NOE has been made, specialist review as part of a multidisciplinary team approach should be arranged |
| <b>NOMENCLATURE</b><br>'Necrotising Otitis Externa' is the preferred name for this condition over 'Malignant Otitis Externa'                                           |

1  
2  
3 3904  
5  
6 391 **DISCUSSION**7  
8 392

9  
10 393 This is the first published study which has sought to standardise diagnostic and outcome criteria  
11  
12 394 for NOE, following consultation with experts working in the field from three specialities: ENT,  
13  
14 395 Radiology and Infection. Consensus definitions/statements were obtained for all of the  
15  
16 396 identified areas set out by the expert group at the start of the project.  
17  
18  
19

20 397

21  
22 398 The Delphi process is an ideal method for the development of diagnostic criteria in the absence  
23  
24 399 of an available gold standard test or a robust evidence base<sup>17</sup>, and has been used widely for this  
25  
26 400 purpose<sup>15,19-22</sup>. This method reduces bias, enhances transparency and allows the involvement of  
27  
28 401 individuals from diverse clinical backgrounds and dispersed geographical locations. It also helps  
29  
30 402 ensure that a single influential participant does not have a disproportionate influence on the  
31  
32 403 process. One potential disadvantage of this method is the possible lack of individual  
33  
34 404 responsibility and accountability, however in our work this was addressed in part by in-person  
35  
36 405 discussions and encouragement of feedback from individuals at each round.  
37  
38  
39

40 406

41  
42  
43  
44 407 A major barrier to the agreement of these definitions/statements was the ongoing SARSCoV2  
45  
46 408 Coronavirus Disease (COVID-19) pandemic at the time the Delphi process was being conducted.  
47  
48 409 This was a challenging time for all clinicians, especially Infection specialists, and as a result there  
49  
50 410 were delays in engaging some key stakeholders. Similarly, due to widespread physical  
51  
52 411 distancing we were unable to convene a planned in-person meeting to discuss the final results.  
53  
54  
55  
56  
57  
58  
59

1  
2  
3 412 However, the consistent response rate of  $\geq 76\%$  for all rounds in our study is noteworthy and  
4  
5  
6 413 should afford confidence in the final definitions/statements whilst acting as testament to the  
7  
8 414 commitment of UK specialists to improve outcomes for this neglected condition. For context,  
9  
10  
11 415 response rates to Delphi surveys are usually low; one review reported that a response rate of  
12  
13 416 35–40% is typical during a first round consultation with 15-18 participants and that surveys with  
14  
15 417 larger pools of participants tend to have lower response rates<sup>23</sup>.

16  
17  
18 418  
19  
20 419 Discussion at the in-person meeting confirmed it was not clinically appropriate to have a binary  
21  
22  
23 420 case definition for NOE given that currently available investigations cannot reliably distinguish  
24  
25 421 patients with NOE from those without. For this reason, a decision was made to include a case  
26  
27  
28 422 definition for 'possible' NOE in the study outputs, to describe those patients without definitive  
29  
30 423 evidence of NOE but for whom clinical suspicion is still high. This approach has been applied  
31  
32  
33 424 successfully in other infective conditions involving bone<sup>24,25</sup>. Infection of the EAC is likely a  
34  
35 425 continuum, with otitis externa and NOE extremes of the same disease process. Further work is  
36  
37  
38 426 needed to understand 'possible' NOE, the investigations that reliably distinguish these cases  
39  
40 427 from definite NOE and the variables that determine the outcome of such cases.

41  
42 428  
43  
44  
45 429 The final consensus definitions for NOE adopted by the group include symptoms, signs and  
46  
47  
48 430 radiological changes as obligatory criteria. Specific radiological abnormalities are a relatively  
49  
50 431 objective measure which can be standardised across sites and assessed in future work. Whilst  
51  
52 432 the ideal modality to diagnose NOE is debated<sup>2,26,27</sup>, we chose to only include radiological

## UK Definitions for NOE

1  
2  
3 433 changes on computer tomography (CT) and MRI, given these modalities are most widely  
4  
5  
6 434 available in the UK.  
7  
8 435  
9  
10 436 Otagia and the presence of granulation tissue or inflammation in the EAC were considered  
11  
12  
13 437 essential for diagnosis of a definite case in our definition. In contrast, only 78% and 76% of  
14  
15 438 studies respectively were found to consider these features obligatory criteria in our systematic  
16  
17  
18 439 review (*Takata et al, submitted*). It is possible that our definition may be less sensitive and will  
19  
20 440 wrongly exclude 'true' cases of NOE, without visible EAC changes or without pain. However, our  
21  
22  
23 441 definition is a starting point, which will evolve as data from a planned UK, multicentre  
24  
25 442 observational study of NOE (Improving outcomes in NOE (IONOE)) and other studies emerge.  
26  
27  
28 443  
29  
30 444 The role of the multidisciplinary team (MDT) working in the improvement of patient outcomes  
31  
32 445 is well known<sup>28-30</sup>. In the management of complex orthopaedic infections, time to diagnosis and  
33  
34  
35 446 clinical outcomes have both been shown to improve when MDTs function well<sup>31,32</sup>. The benefits  
36  
37  
38 447 of an MDT approach are multifactorial; patients benefit from care that is co-ordinated,  
39  
40 448 individualised and delivered by experts; clinicians benefit by having increased exposure to a  
41  
42 449 larger number of cases which improves expertise; and the Unit benefits as the improvements in  
43  
44  
45 450 outcomes build morale<sup>28</sup>. There are sparse data addressing the benefit of MDT working on  
46  
47 451 outcomes for NOE. However, a UK study by Sharma *et al.*, has shown that an MDT approach  
48  
49  
50 452 resulted in a shorter duration of therapy and lower mean hospital length of stay for NOE  
51  
52 453 patients<sup>33</sup>. In our study there was strong support for an MDT model to manage NOE, but  
53  
54  
55 454 concern that this would not be realistically achievable in the absence of dedicated local funding.  
56  
57  
58  
59  
60

1  
2  
3 455  
4  
5  
6 456 The term 'malignant otitis externa' (MOE) was first coined by Chandler in 1968 when reporting  
7  
8 457 the first case series of severe temporal bone osteomyelitis, originating from the EAC, associated  
9  
10 458 with *Pseudomonas aeruginosa* infection<sup>34</sup>. Later the term 'NOE' was introduced<sup>35</sup>. The terms  
11  
12  
13 459 MOE and NOE have since been used interchangeably to describe the condition. Whilst the  
14  
15 460 terms 'necrotising' and 'malignant' convey the aggressive and serious nature of the condition,  
16  
17 461 they are both recognised to be misnomers in that they do not describe the pathophysiology of  
18  
19  
20 462 the condition. It was proposed and accepted that since malignancy is an important differential  
21  
22  
23 463 for this condition, it was preferable to use the term 'necrotising otitis externa'.  
24

25 464

## 27 465 **Conclusion**

29  
30 466 This work distils the clinical opinion of a large group of multidisciplinary specialists from across  
31  
32 467 the UK to create practical definitions and statements to support clinical practice and research  
33  
34  
35 468 for NOE. This is the first step in an iterative process. Further work will seek to validate and test  
36  
37 469 these definitions and inform their evolution.  
38  
39  
40  
41  
42  
43  
44  
45  
46  
47  
48  
49  
50  
51  
52  
53  
54  
55  
56  
57  
58  
59  
60

1  
2  
3 470  
4

5  
6 471 **CONFLICT OF INTEREST/DISCLOSURES**  
7

8 472 Nil to disclose.  
9

10 473  
11

12  
13 474  
14

15  
16  
17  
18  
19  
20  
21  
22  
23  
24  
25  
26  
27  
28  
29  
30  
31  
32  
33  
34  
35  
36  
37  
38  
39  
40  
41  
42  
43  
44  
45  
46  
47  
48  
49  
50  
51  
52  
53  
54  
55  
56  
57  
58  
59  
60

For peer review only

1  
2  
3  
4  
5  
6  
7  
8  
9  
10  
11  
12  
13  
14  
15  
16  
17  
18  
19  
20  
21  
22  
23  
24  
25  
26  
27  
28  
29  
30  
31  
32  
33  
34  
35  
36  
37  
38  
39  
40  
41  
42  
43  
44  
45  
46  
47  
48  
49  
50  
51  
52  
53  
54  
55  
56  
57  
58  
59  
60

475

For peer review only

476

For peer review only

1  
2  
3  
4  
5  
6  
7  
8  
9  
10  
11  
12  
13  
14  
15  
16  
17  
18  
19  
20  
21  
22  
23  
24  
25  
26  
27  
28  
29  
30  
31  
32  
33  
34  
35  
36  
37  
38  
39  
40  
41  
42  
43  
44  
45  
46  
47  
48  
49  
50  
51  
52  
53  
54  
55  
56  
57  
58  
59  
60



1  
2  
3 477 **Funding Statement**  
4

5  
6 478 No funding received for this study  
7

8 479

9 480 **Data sharing Statement** The data that support the findings of this study are openly available on

10  
11 481 Figshare: 10.6084/m9.figshare.19119455  
12

13 482

14 483

15  
16 484

17  
18 485 **REFERENCES**  
19

20 486

- 21 487 1. Rubin J, Yu VL. Malignant external otitis: insights into pathogenesis, clinical  
22 488 manifestations, diagnosis, and therapy. *Am J Med* 1988;85:391-8.  
23 489 2. van Kroonenburgh A, van der Meer WL, Bothof RJP, van Tilburg M, van Tongeren J,  
24 490 Postma AA. Advanced Imaging Techniques in Skull Base Osteomyelitis Due to Malignant Otitis  
25 491 Externa. *Curr Radiol Rep* 2018;6:3.  
26 492 3. Mahdyoun P, Pulcini C, Gahide I, et al. Necrotizing otitis externa: a systematic review.  
27 493 *Otol Neurotol* 2013;34:620-9.  
28 494 4. Byun YJ, Patel J, Nguyen SA, Lambert PR. Necrotizing Otitis Externa: A Systematic Review  
29 495 and Analysis of Changing Trends. *Otol Neurotol* 2020;41:1004-11.  
30 496 5. Stern Shavit S, Soudry E, Hamzany Y, Nageris B. Malignant external otitis: Factors  
31 497 predicting patient outcomes. *Am J Otolaryngol* 2016;37:425-30.  
32 498 6. Hasibi M, Ashtiani MK, Motassadi Zarandi M, et al. A Treatment Protocol for  
33 499 Management of Bacterial and Fungal Malignant External Otitis: A Large Cohort in Tehran, Iran.  
34 500 *Ann Otol Rhinol Laryngol* 2017;126:561-7.  
35 501 7. Chawdhary G, Pankhania M, Douglas S, Bottrill I. Current management of necrotising  
36 502 otitis externa in the UK: survey of 221 UK otolaryngologists. *Acta Otolaryngol* 2017;137:818-22.  
37 503 8. Cohen D, Friedman P. The diagnostic criteria of malignant external otitis. *J Laryngol Otol*  
38 504 1987;101:216-21.  
39 505 9. Stahlmann R, Lode H. Safety considerations of fluoroquinolones in the elderly: an  
40 506 update. *Drugs Aging* 2010;27:193-209.  
41 507 10. Bernstein JM, Holland NJ, Porter GC, Maw AR. Resistance of *Pseudomonas* to  
42 508 ciprofloxacin: implications for the treatment of malignant otitis externa. *J Laryngol Otol*  
43 509 2007;121:118-23.  
44 510 11. Rehman A, Patrick WM, Lamont IL. Mechanisms of ciprofloxacin resistance in  
45 511 *Pseudomonas aeruginosa*: new approaches to an old problem. *J Med Microbiol* 2019;68:1-10.  
46 512 12. Wee I, Chin B, Syn N, Lee KS, Ng JJ, Choong A. The association between fluoroquinolones  
47 513 and aortic dissection and aortic aneurysms: a systematic review and meta-analysis. *Sci Rep*  
48 514 2021;11:11073.  
49  
50  
51  
52  
53  
54  
55  
56  
57  
58  
59  
60

- 1  
2  
3 515 13. Page MJ, McKenzie JE, Bossuyt PM, et al. The PRISMA 2020 statement: an updated  
4 516 guideline for reporting systematic reviews. *BMJ* 2021;372:n71.
- 5 517 14. Moher D, Schulz KF, Simera I, Altman DG. Guidance for developers of health research  
6 518 reporting guidelines. *PLoS Med* 2010;7:e1000217.
- 7 519 15. Mitha A, Boulyana M, Hue V, et al. Consensus in diagnostic definitions for bone or joint  
8 520 infections in children by a Delphi method with European French-speaking experts. *Acta Paediatr*  
9 521 2012;101:e350-6.
- 10 522 16. Windle PE. Delphi technique: assessing component needs. *J Perianesth Nurs*  
11 523 2004;19:46-7.
- 12 524 17. Eibling D, Fried M, Blitzer A, Postma G. Commentary on the role of expert opinion in  
13 525 developing evidence-based guidelines. *Laryngoscope* 2014;124:355-7.
- 14 526 18. Diamond IR, Grant RC, Feldman BM, et al. Defining consensus: a systematic review  
15 527 recommends methodologic criteria for reporting of Delphi studies. *J Clin Epidemiol*  
16 528 2014;67:401-9.
- 17 529 19. Olszewska E, Rutkowska J, Ozgirgin N. Consensus-Based Recommendations on the  
18 530 Definition and Classification of Cholesteatoma. *J Int Adv Otol* 2015;11:81-7.
- 19 531 20. Weir NM, Pattison SH, Kearney P, et al. Criteria required for an acceptable point-of-care  
20 532 test for UTI detection: Obtaining consensus using the Delphi technique. *PLoS One*  
21 533 2018;13:e0198595.
- 22 534 21. Yung M, Tono T, Olszewska E, et al. EAONO/JOS Joint Consensus Statements on the  
23 535 Definitions, Classification and Staging of Middle Ear Cholesteatoma. *J Int Adv Otol* 2017;13:1-8.
- 24 536 22. Rybak YE, Lai KSP, Ramasubbu R, et al. Treatment-resistant major depressive disorder:  
25 537 Canadian expert consensus on definition and assessment. *Depress Anxiety* 2021;38:456-67.
- 26 538 23. Lewin SR, Attoye T, Bansbach C, et al. Multi-stakeholder consensus on a target product  
27 539 profile for an HIV cure. *Lancet HIV* 2021;8:e42-e50.
- 28 540 24. Metsemakers WJ, Morgenstern M, McNally MA, et al. Fracture-related infection: A  
29 541 consensus on definition from an international expert group. *Injury* 2018;49:505-10.
- 30 542 25. McNally M, Sousa R, Wouthuyzen-Bakker M, et al. The EBJIS definition of periprosthetic  
31 543 joint infection. *Bone Joint J* 2021;103-B:18-25.
- 32 544 26. Morales RE, Eisenman DJ, Raghavan P. Imaging Necrotizing Otitis Externa. *Semin*  
33 545 *Roentgenol* 2019;54:215-26.
- 34 546 27. Mehrotra P, Elbadawey MR, Zammit-Maempel I. Spectrum of radiological appearances  
35 547 of necrotising external otitis: a pictorial review. *J Laryngol Otol* 2011;125:1109-15.
- 36 548 28. Epstein NE. Multidisciplinary in-hospital teams improve patient outcomes: A review.  
37 549 *Surg Neurol Int* 2014;5:S295-303.
- 38 550 29. Nodoro S. Effective multidisciplinary working: the key to high-quality care. *Br J Nurs*  
39 551 2014;23:724-7.
- 40 552 30. Prades J, Remue E, van Hoof E, Borrás JM. Is it worth reorganising cancer services on the  
41 553 basis of multidisciplinary teams (MDTs)? A systematic review of the objectives and organisation  
42 554 of MDTs and their impact on patient outcomes. *Health Policy* 2015;119:464-74.
- 43 555 31. Prendki V, Zeller V, Passeron D, et al. Outcome of patients over 80 years of age on  
44 556 prolonged suppressive antibiotic therapy for at least 6 months for prosthetic joint infection. *Int*  
45 557 *J Infect Dis* 2014;29:184-9.

- 1  
2  
3 558 32. Ibrahim MS, Raja S, Khan MA, Haddad FS. A multidisciplinary team approach to two-  
4 559 stage revision for the infected hip replacement: a minimum five-year follow-up study. Bone  
5 560 Joint J 2014;96-B:1312-8.  
6  
7 561 33. Sharma S, Corrah T, Singh A. Management of Necrotizing Otitis Externa: Our Experience  
8 562 with Forty-Three Patients. J Int Adv Otol 2017;13:394-8.  
9 563 34. Chandler JR. Malignant external otitis. Laryngoscope 1968;78:1257-94.  
10 564 35. Kohut RI, Lindsay JR. Necrotizing ("malignant") external otitis histopathologic processes.  
11 565 Ann Otol Rhinol Laryngol 1979;88:714-20.  
12  
13 566  
14  
15 567  
16  
17  
18 568  
19  
20 569  
21  
22  
23 570  
24  
25 571  
26  
27  
28 572  
29  
30 573  
31  
32 574  
33  
34  
35 575  
36  
37 576  
38  
39  
40 577  
41  
42 578  
43  
44  
45 579  
46  
47 580  
48  
49  
50 581  
51  
52 582  
53  
54 583  
55  
56  
57  
58  
59  
60

1  
2  
3 584  
4  
5  
6 585  
7  
8 586  
9

10 587 **FIGURE LEGENDS**

11  
12  
13 588

14  
15 589 **Figure 1.** Overview of process to develop consensus case definitions and statements for NOE

16  
17  
18 590

19  
20 591 **Figure 2.** Rounds in Delphi process showing response rate (RR) for each Round and speciality

21  
22 involvement

23 592  
24  
25 593

26  
27 594  
28  
29  
30  
31  
32  
33  
34  
35  
36  
37  
38  
39  
40  
41  
42  
43  
44  
45  
46  
47  
48  
49  
50  
51  
52  
53  
54  
55  
56  
57  
58  
59  
60

1  
2  
3  
4  
5  
6  
7  
8  
9  
10  
11  
12  
13  
14  
15  
16  
17  
18  
19  
20  
21  
22  
23  
24  
25  
26  
27  
28  
29  
30  
31  
32  
33  
34  
35  
36  
37  
38  
39  
40  
41

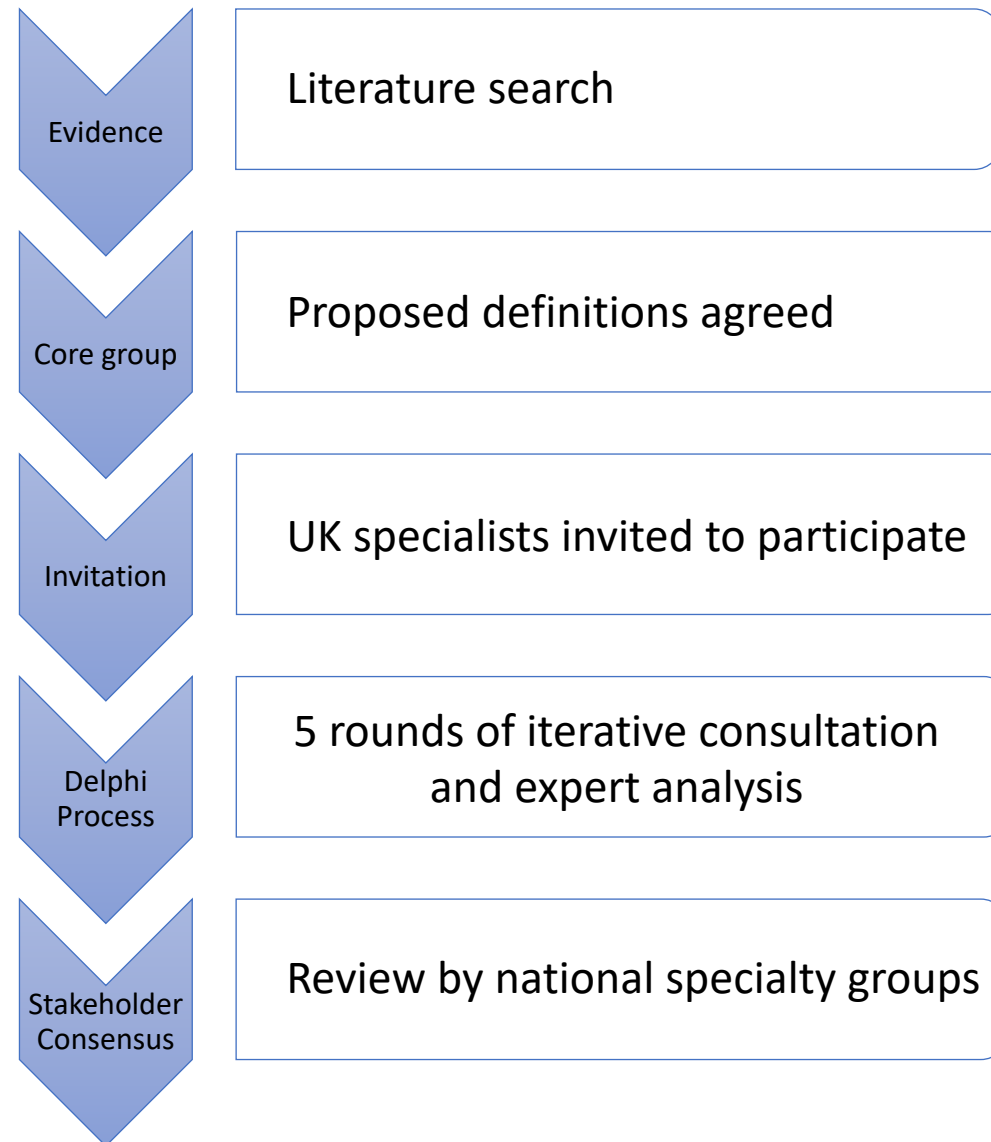

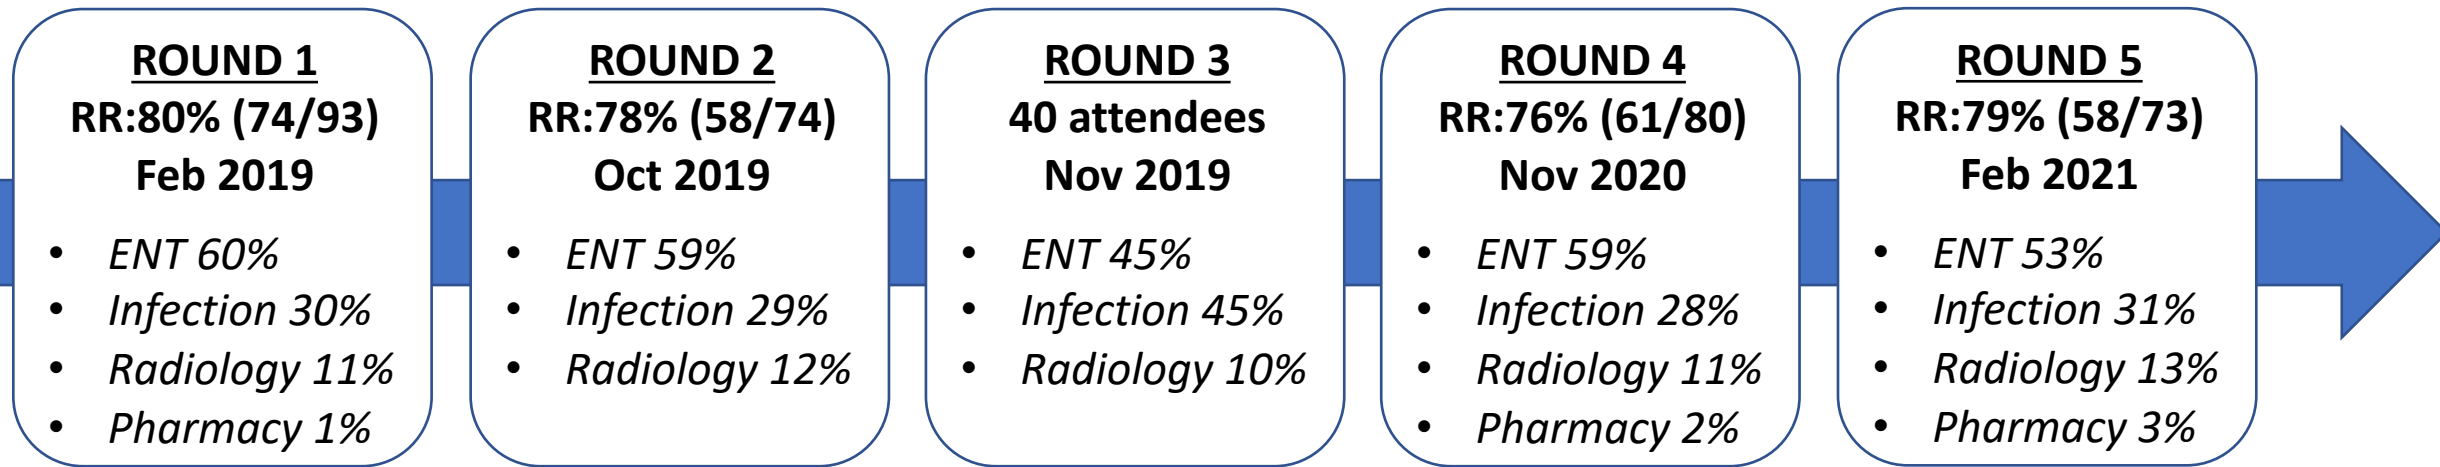

# BMJ Open

## UK consensus definitions for Necrotising Otitis Externa: a Delphi study

|                                 |                                                                                                                                                                                                                                                                                                                                                                                                                                                                                                                                                                                                                                                                                                                                                                                                                                                                            |
|---------------------------------|----------------------------------------------------------------------------------------------------------------------------------------------------------------------------------------------------------------------------------------------------------------------------------------------------------------------------------------------------------------------------------------------------------------------------------------------------------------------------------------------------------------------------------------------------------------------------------------------------------------------------------------------------------------------------------------------------------------------------------------------------------------------------------------------------------------------------------------------------------------------------|
| Journal:                        | <i>BMJ Open</i>                                                                                                                                                                                                                                                                                                                                                                                                                                                                                                                                                                                                                                                                                                                                                                                                                                                            |
| Manuscript ID                   | bmjopen-2022-061349.R1                                                                                                                                                                                                                                                                                                                                                                                                                                                                                                                                                                                                                                                                                                                                                                                                                                                     |
| Article Type:                   | Original research                                                                                                                                                                                                                                                                                                                                                                                                                                                                                                                                                                                                                                                                                                                                                                                                                                                          |
| Date Submitted by the Author:   | 17-Dec-2022                                                                                                                                                                                                                                                                                                                                                                                                                                                                                                                                                                                                                                                                                                                                                                                                                                                                |
| Complete List of Authors:       | Hodgson, Susanne; University of Oxford<br>Khan, M. M.; Central Manchester University Hospitals NHS Foundation Trust<br>Patrick-Smith, Maia; University of Oxford<br>Martinez-Devesa, P; John Radcliffe Hospital, Department of ENT<br>Stapleton, Emma; Central Manchester University Hospitals NHS Foundation Trust, Department of Otolaryngology<br>Williams, O Martin; University Hospitals Bristol and Weston NHS Foundation Trust, Department of Microbiology<br>Pretorius, Pieter; John Radcliffe Hospital, Department of Neuroradiology<br>McNally, Martin; Oxford University Hospitals NHS Foundation Trust<br>Nuffield Orthopaedic Centre, Nuffield Orthopaedic centre<br>Andersson, Monique; Oxford University Hospitals NHS Foundation Trust, Department of Microbiology; University of Oxford,<br>on behalf of UK NOE Collaborative, . . ; University of Oxford |
| <b>Primary Subject Heading</b>: | Infectious diseases                                                                                                                                                                                                                                                                                                                                                                                                                                                                                                                                                                                                                                                                                                                                                                                                                                                        |
| Secondary Subject Heading:      | Ear, nose and throat/otolaryngology, Radiology and imaging                                                                                                                                                                                                                                                                                                                                                                                                                                                                                                                                                                                                                                                                                                                                                                                                                 |
| Keywords:                       | MICROBIOLOGY, INFECTIOUS DISEASES, OTOLARYNGOLOGY, RADIOLOGY & IMAGING, Adult otolaryngology < OTOLARYNGOLOGY                                                                                                                                                                                                                                                                                                                                                                                                                                                                                                                                                                                                                                                                                                                                                              |
|                                 |                                                                                                                                                                                                                                                                                                                                                                                                                                                                                                                                                                                                                                                                                                                                                                                                                                                                            |

SCHOLARONE™  
Manuscripts

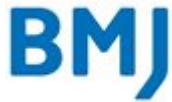

I, the Submitting Author has the right to grant and does grant on behalf of all authors of the Work (as defined in the below author licence), an exclusive licence and/or a non-exclusive licence for contributions from authors who are: i) UK Crown employees; ii) where BMJ has agreed a CC-BY licence shall apply, and/or iii) in accordance with the terms applicable for US Federal Government officers or employees acting as part of their official duties; on a worldwide, perpetual, irrevocable, royalty-free basis to BMJ Publishing Group Ltd ("BMJ") its licensees and where the relevant Journal is co-owned by BMJ to the co-owners of the Journal, to publish the Work in this journal and any other BMJ products and to exploit all rights, as set out in our [licence](#).

The Submitting Author accepts and understands that any supply made under these terms is made by BMJ to the Submitting Author unless you are acting as an employee on behalf of your employer or a postgraduate student of an affiliated institution which is paying any applicable article publishing charge ("APC") for Open Access articles. Where the Submitting Author wishes to make the Work available on an Open Access basis (and intends to pay the relevant APC), the terms of reuse of such Open Access shall be governed by a Creative Commons licence – details of these licences and which [Creative Commons](#) licence will apply to this Work are set out in our licence referred to above.

Other than as permitted in any relevant BMJ Author's Self Archiving Policies, I confirm this Work has not been accepted for publication elsewhere, is not being considered for publication elsewhere and does not duplicate material already published. I confirm all authors consent to publication of this Work and authorise the granting of this licence.



## UK consensus definitions for Necrotising Otitis Externa: a Delphi study

Hodgson SH<sup>\*1,2,3</sup>, Khan M<sup>\*4</sup>, Patrick-Smith M<sup>5</sup>, Martinez-Devesa P<sup>6</sup>, Stapleton E<sup>4</sup>, Williams M<sup>7,8</sup>, Pretorius P<sup>9</sup>, McNally MA<sup>10</sup>, Andersson MI<sup>1,11§</sup> on behalf of the UK NOE Collaborative

*\*These authors contributed equally.*

<sup>1</sup>Department of Microbiology and Infectious Diseases, Oxford University Hospitals NHS Foundation Trust, John Radcliffe Hospital, Headley Way, Oxford, OX3 9DU, UK

<sup>2</sup>Jenner Institute, Nuffield Department of Medicine, University of Oxford, Old Road Campus, Off Roosevelt Drive, Churchill Hospital, Headington, Oxford, OX3 7DQ, UK

<sup>3</sup>Department of Biochemistry, University of Oxford, South Parks Road, Oxford, OX1 3QU, UK

<sup>4</sup>Department of ENT, Manchester University Hospitals NHS Foundation Trust, Manchester Royal Infirmary. Oxford Road, Manchester, M13 9WL, UK

<sup>5</sup>University of Oxford Clinical Medical School, University of Oxford, John Radcliffe Hospital, Headley Way, Oxford, OX3 9DU, UK

<sup>6</sup>Department of ENT, Oxford University Hospitals NHS Foundation Trust, John Radcliffe Hospital, Headley Way, Oxford, OX3 9DU, UK

<sup>7</sup>Department of Infection, University Hospitals Bristol and Weston NHS Foundation Trust, Marlborough Street, Bristol, Avon, BS1 3NU, UK

<sup>8</sup>Public Health England Microbiology Services Bristol, Bristol Royal Infirmary, Upper Maudlin Street, Bristol, BS2 8HW, UK

<sup>9</sup>Department of Neuroradiology, Oxford University Hospitals NHS Foundation Trust, John Radcliffe Hospital, Headley Way, Oxford, OX3 9DU, UK

<sup>10</sup>Bone Infection Unit, Oxford University Hospitals NHS Foundation Trust, Windmill Road, Headington, Oxford OX3 7HE, UK

<sup>11</sup>Nuffield Division of Clinical Laboratory Science, Radcliffe Department of Medicine, University of Oxford, John Radcliffe Hospital, Headley Way, Oxford, OX3 9DU, UK

§Corresponding author:

1  
2  
3 44 Dr Monique Andersson  
4 45 Email: [monique.andersson@ouh.nhs.uk](mailto:monique.andersson@ouh.nhs.uk)  
5 46 Telephone: 01865 220886  
6 47 Oxford University Hospitals NHS Foundation Trust  
7 48 Department of Microbiology and Infectious Diseases  
8 49 John Radcliffe Hospital  
9 50 Headley Way  
10 51 Oxford  
11 52 OX3 9DU  
12 53 United Kingdom  
13  
14  
15  
16  
17

### 18 56 UK NOE Collaborative

- 19 57
- 20 58 • Chris Aldren, Consultant in ENT Surgery, NHS Frimley Health Foundation Trust
  - 21 59 Victoria Alexander, Consultant in ENT Surgery, St George's University Hospitals NHS Trust and
  - 22 60 Epsom
  - 23 61 and St Helier University Hospitals NHS Trust
  - 24 62 • Fiona Andrewartha, Consultant in Infection, Nottinghamshire Healthcare NHS Foundation Trust
  - 25 63 • Helen Atkinson, Specialist trainee in ENT Surgery, Yorkshire and Humberside deanery
  - 26 64 • Manohar Bance, Consultant in ENT Surgery, Cambridge University Hospitals NHS Foundation
  - 27 65 Trust
  - 28 66 • Rupan Banga, Consultant in ENT Surgery, University Hospitals Birmingham NHS Foundation Trust
  - 29 67 • David Baring, Consultant in ENT Surgery, NHS Lothian, Edinburgh
  - 30 68 • Tim Beale, Consultant Radiologist, University College London Hospitals NHS Foundation Trust
  - 31 69 • Alex Bennett, Consultant in ENT Surgery, NHS Lothian, Edinburgh
  - 32 70 • Ian Bottrill, Consultant in ENT Surgery, Oxford University Hospitals NHS Foundation Trust
  - 33 71 • F Kay Seymour, Consultant in ENT Surgery, Barts Health NHS Trust
  - 34 72 • Philip Clamp, Consultant in ENT Surgery, University Hospitals Bristol and Weston NHS
  - 35 73 Foundation Trust
  - 36 74 • Julia Colston, Consultant in Infection, Kings College Hospital NHS Foundation Trust
  - 37 75 • Tumena Corrah, Consultant in Infection, London North West University Healthcare NHS Trust
  - 38 76 • Lucy Dalton, Specialist Trainee in ENT Surgery, University Hospitals Birmingham NHS Foundation
  - 39 77 Trust
  - 40 78 • Sudip Das, Consultant in ENT Surgery, University Hospitals of Leicester NHS Trust
  - 41 79 • Eoghan deBarra, Consultant in Infection, Beaumont Hospital, Royal College of Surgeons in
  - 42 80 Ireland Hospital Group, Dublin, Ireland.
  - 43 81 • Jane Democratis, Consultant in Infection, NHS Frimley Health Foundation Trust
  - 44 82 • Reena Dwivedi, Consultant Radiologist, Salford Royal NHS Foundation Trust
  - 45 83 • Chi Eziefula, Consultant in Infection, Brighton and Sussex University Hospitals NHS Trust
  - 46 84 • Susannah Froude, Consultant in Infection, University Hospital of Wales
  - 47 85 • Mark Gilchrist, Consultant Pharmacist, Imperial College Healthcare NHS Trust
  - 48 86 • Laura Harrison, Specialist Trainee in ENT Surgery, Oxford University Hospitals NHS Foundation
  - 49 87 Trust
  - 50 88 • Mary Hart, Consultant Radiologist, University Hospital of Wales
- 51  
52  
53  
54  
55  
56  
57  
58  
59  
60

*UK Definitions for NOE*

- 1  
2  
3 89 • Carolyn Hemsley, Consultant in Infection, Guys and St Thomas' NHS Foundation Trust  
4 90 • Michael Hopkins, Specialist Trainee in ENT Surgery, NHS Lothian, Edinburgh  
5 91 • Alex Howard, Consultant in Infection, Liverpool University Hospitals NHS Foundation Trust  
6 92 • Harriet Hughes, Consultant in Infection, University Hospital of Wales  
7 93 • Arun Iyer, Consultant in ENT Surgery, NHS Greater Glasgow and Clyde  
8 94 • Susan Jawad, Consultant Radiologist, University College London Hospitals NHS Foundation Trust  
9 95 • Gwennan Jones, Specialist Trainee in Infection, University Hospital of Wales  
10 96 • Nicola Jones, Consultant in Infection, Oxford University Hospitals NHS Foundation Trust  
11 97 • Gillian Jones, Consultant in Infection, Brighton and Sussex University Hospitals NHS Trust  
12 98 • Hala Kanona, Specialist Trainee in ENT Surgery, University College London Hospitals NHS  
13 99 Foundation Trust  
14 100 • Gerard Kelly, Consultant in ENT Surgery, Leeds Teaching Hospitals NHS Trust  
15 101 • B Nirmal Kumar, Consultant ENT Surgery, Wrightington Wigan & Leigh NHS Foundation Trust  
16 102 • Steven Laird, Consultant in Infection, Coventry and Warwickshire Partnership NHS Trust  
17 103 • Pankaj Lal, Consultant in Infection, Liverpool University Hospitals NHS Foundation Trust  
18 104 • Martin Llewelyn, Consultant in Infection, Brighton and Sussex University Hospitals NHS Trust  
19 105 • Simon K Lloyd, Consultant in ENT Surgery, Manchester University Hospitals NHS Foundation  
20 106 Trust  
21 107 • Sarah Logan, Consultant in Infection, University College London Hospitals NHS Foundation Trust  
22 108 • Sam Mackeith, Consultant in ENT Surgery, Oxford University Hospitals NHS Foundation Trust  
23 109 • Philippa Matthews, Consultant in Infection, Oxford University Hospitals NHS Foundation Trust  
24 110 • Martin McNally, Consultant in Orthopaedic Surgery, Oxford University Hospitals NHS Foundation  
25 111 Trust  
26 112 • Nishchay Mehta, Consultant in ENT Surgery, University College London Hospitals NHS  
27 113 Foundation Trust  
28 114 • Tamara Mitchell, Consultant in Infection, Sheffield Teaching Hospitals NHS Foundation Trust  
29 115 • Hassan Mohammed, Specialist Trainee in ENT Surgery, Newcastle Hospital NHS Foundation Trust  
30 116 • Peter Monksfield, Consultant in ENT Surgery, University Hospitals Birmingham NHS Foundation  
31 117 Trust  
32 118 • Daniel Moualed, Consultant in ENT Surgery, Great Western Hospital NHS Foundation Trust  
33 119 • Rupert Obholzer, Consultant in ENT Surgery, Guys and St Thomas' NHS Foundation Trust  
34 120 • John Phillips, Consultant in ENT Surgery, Norfolk and Norwich University Hospitals NHS  
35 121 Foundation Trust  
36 122 • Peter Rea, Consultant in ENT Surgery, University Hospitals of Leicester NHS Trust  
37 123 • Elisabeth Ridgway, Consultant in Infection, Sheffield Teaching Hospitals NHS Foundation Trust  
38 124 • Philip Robinson, Consultant in ENT Surgery, University Hospitals Bristol and Weston NHS  
39 125 Foundation Trust  
40 126 • Shakeel R. Saeed, Consultant in ENT Surgery, The Royal National Throat, Nose and Ear Hospital  
41 127 and National Hospital for Neurology and Neurosurgery, London  
42 128 • Georgios Sakaglannis, Consultant in ENT Surgery, University Hospitals of Leicester NHS Trust  
43 129 • Frances Sanderson, Consultant in Infection, Imperial College Healthcare NHS Trust  
44 130 • Victoria Sinclair, Specialist Trainee ENT Surgery, Oxford University Hospitals NHS Foundation  
45 131 Trust  
46 132 • Avind Singh, Consultant ENT Surgery, London North West University Healthcare NHS Trust  
47 133 • Wendy Smith, Consultant in ENT Surgery, Kettering General Hospital NHS Foundation Trust  
48 134 • Dominic StLeger, Consultant Radiologist, Manchester University Hospitals NHS Foundation Trust  
49  
50  
51  
52  
53  
54  
55  
56  
57  
58  
59  
60

- 1  
2  
3 135 • David Summers, Consultant Radiologist, NHS Lothian, Edinburgh  
4 136 • Rebecca Sutherland, Consultant in Infection, NHS Lothian, Edinburgh  
5 137 • Andrew Swift, Consultant in ENT Surgery, Liverpool University Hospitals NHS Foundation Trust  
6 138 • Aaron Trinidad, Consultant in ENT Surgery, Southend University Hospital NHS Trust  
7 139 • Matthew Trotter, Consultant in ENT Surgery, University Hospital Coventry and Warwickshire  
8 140 NHS Trust  
9 141 • Michael Wareing, Consultant in ENT Surgery, Barts Health NHS Trust  
10 142 • Glen Watson, Consultant in ENT Surgery, Sheffield Teaching Hospitals NHS Foundation Trust  
11 143 • Martin Williams, Consultant in Infection, University Hospitals Bristol and Weston NHS  
12 144 Foundation Trust  
13 145 • Mandy Williams, Consultant Radiologist, University Hospitals Bristol and Weston NHS  
14 146 Foundation Trust  
15 147 • Tom Wilson, Consultant in ENT Surgery, Leeds and York Partnership NHS Foundation Trust  
16 148 • Ding Yang, Consultant in ENT Surgery, University College London Hospitals NHS Foundation Trust  
17 149 • Phil Yates, Consultant in ENT Surgery, Newcastle Hospital NHS Foundation Trust  
18 150 • Ahmed Youssef, Consultant in ENT Surgery, Liverpool University Hospitals NHS Foundation Trust  
19 151 • Ivan Zammit, Consultant Radiologist, Newcastle Hospital NHS Foundation Trust  
20  
21  
22  
23  
24  
25

26 155 Keywords: Necrotising, malignant, otitis externa, Pseudomonas, antimicrobial  
27 156

28 157 Word count: 2657  
29 158

30 159 Number of References: 37  
31 160  
32 161  
33 162  
34 163  
35 164  
36 165  
37 166  
38 167  
39 168  
40 169  
41 170  
42 171  
43 172  
44 173  
45 174  
46 175  
47 176  
48 177  
49  
50  
51  
52  
53  
54  
55  
56  
57  
58  
59  
60

1  
2  
3 178  
4 179  
5 180 **ABSTRACT**

6 181  
7  
8  
9 182 **Objective:** To establish consensus definitions for NOE to facilitate the diagnosis and exclusion of  
10  
11  
12 183 NOE in clinical practice and expedite future high-quality study of this neglected condition.

13  
14 184  
15  
16 185 **Design:** The work comprised of a systematic review of the literature, five iterative rounds of  
17  
18  
19 186 consultation via a Delphi process and open discussion within the collaborative. An expert panel  
20  
21  
22 187 analysed the results to produce the final outputs which were shared with and endorsed by  
23  
24 188 national speciality bodies.

25  
26 189  
27  
28  
29 190 **Setting:** Secondary care in the United Kingdom (UK).

30  
31 191  
32  
33  
34 192 **Participants:** UK clinical specialists practising in Infection, Ear Nose and Throat Surgery or  
35  
36 193 Radiology.

37  
38 194  
39  
40  
41 195 **Main Outcome Measures:** Definitions and statements meeting the following criteria were  
42  
43  
44 196 accepted: (a) Minimum of 70% of respondents in agreement or strong agreement with a  
45  
46 197 definition/statement AND (b) <15% of respondents in disagreement or strong disagreement  
47  
48 198 with a definition/statement.

49  
50  
51 199  
52  
53 200 **Results:** Seventy four UK clinicians specialising in ENT, Infection and Radiology with a special  
54  
55  
56 201 interest in NOE took part in the work which was undertaken between 2019 and 2021. The

1  
2  
3 202 minimum response rate for a Round was 76%. Consensus criteria for all proposed case  
4  
5  
6 203 definitions, outcome definitions and consensus statements were met in the fifth round.  
7

8 204  
9  
10 205 **Conclusions:** This work distils the clinical opinion of a large group of multidisciplinary specialists  
11  
12  
13 206 from across the UK to create practical definitions and statements to support clinical practice  
14  
15 207 and research for NOE. This is the first step in an iterative process. Further work will seek to  
16  
17  
18 208 validate and test these definitions and inform their evolution.  
19

20 209  
21  
22 210 **Key words:** Necrotising, malignant, otitis, externa, Pseudomonas, antimicrobial therapy  
23  
24

25 211

26 212

27 213 **Strengths and Limitations:**  
28  
29

30 214

- 31  
32 215
- 33 216 • *This Delphi process has engaged a large group of respondents - 74 UK-based clinicians*
  - 34 217 *across the key three specialities expert in managing patients with NOE (ENT, Infection*
  - 35 218 *and Radiology).*
  - 36 219 • *The response rate to each of the Rounds is considered high for a Delphi study (>75%).*
  - 37 220 • *A broad recruitment strategy was employed, but we may have missed UK clinicians who*
  - 38 221 *are experts in this field.*
  - 39 222 • *We have only recruited clinicians based in the UK.*
- 40  
41  
42  
43 223

44  
45  
46 223  
47  
48  
49  
50  
51  
52  
53  
54  
55  
56  
57  
58  
59  
60

## 224 INTRODUCTION

225  
226 Necrotising otitis externa (NOE) is an under-recognised, poorly understood, severe infection of  
227 the external auditory canal (EAC) and lateral skull base. If detected late, this condition has a  
228 poor outcome with spread of infection to involve the cranial nerves, the base of skull and the  
229 central nervous system(1). Patients affected by NOE are generally frail and elderly with multiple  
230 co-morbidities(2, 3). This condition presents a challenge to Ear, Nose and Throat (ENT) in-  
231 patient surgical units, which are generally ill equipped to manage complex, long-stay and  
232 commonly frail medical patients. The disease is associated with high mortality; one case-series  
233 reported overall survival of 38% at 5 years with disease-specific mortality of 14%(4). Early  
234 diagnosis and treatment may reduce the need for long-term antibiotic therapy and will reduce  
235 the risk of serious complications.

236  
237 No established national or international guidelines exist for the diagnosis and management of  
238 NOE(5). Most published series are limited and of poor quality(2, 3) . Not surprisingly, the  
239 optimal strategy for diagnosis and management of NOE remains uncertain(2, 3) and there is  
240 considerable variability in how this condition is managed(6).

241  
242 Cohen and Friedman's definition of NOE from 1987 is often cited(7) and modified versions are  
243 used in some studies(2). However, publications often fail to explicitly state their criteria for  
244 defining a case of NOE, and for those that do, there is considerable variation in the definitions  
245 applied(2). To date there is no widely accepted case definition for NOE and none have been

1  
2  
3 246 developed via consensus of multidisciplinary experts. The lack of an accepted definition has  
4  
5  
6 247 impeded progress in developing diagnostic and treatment algorithms.  
7

8 248  
9

10 249 *Why is a consensus definition for NOE needed?*  
11  
12

13 250 A diagnostic definition has two distinct uses. Firstly and most importantly it provides the non-  
14  
15 251 expert clinician with a clear set of criteria to facilitate diagnosis or the exclusion of NOE. Under  
16  
17 252 recognition of NOE results in a delay in diagnosis increasing the risk of serious complications  
18  
19 253 and poorer outcomes in an already frail population. Conversely, given that NOE is typically  
20  
21 254 treated with prolonged courses of broad-spectrum antimicrobials, unnecessary treatment of  
22  
23 255 individuals without NOE with extended regimens exposes frail patients to the serious risks  
24  
25 256 associated with these agents(8) as well as contributing more broadly to antimicrobial  
26  
27 257 resistance(9-11). Accurate diagnostic processes for NOE are therefore important to optimise  
28  
29 258 outcomes for patients with and without NOE. However, to date, no test with sufficient  
30  
31 259 sensitivity and specificity to definitively diagnose or exclude NOE exists, and a poor evidence  
32  
33 260 base is of little help to inform nuanced clinical decision making(2, 3).  
34  
35  
36  
37  
38  
39  
40

41 261 Secondly, a major limitation of the published literature on NOE is the lack of a consensus  
42  
43 262 definition for NOE. As a result, publications likely reflect heterogenous populations and robust  
44  
45 263 comparison across datasets is impossible. A consensus definition is needed to facilitate future  
46  
47 264 high-quality study of the condition. For example, studies of new treatment regimens must  
48  
49 265 include a robust case definition so findings can be critically appraised and applied to other  
50  
51 266 patient cohorts.  
52  
53  
54  
55  
56  
57  
58  
59  
60



1  
2  
3 267 *What are the aims of the definitions/statements?*  
4

5  
6 268 To be widely used and applied, consensus definitions and statements must be robust but also  
7  
8 269 practical. For example, given that many sites in the UK do not have access to urgent magnetic  
9  
10 270 resonance imaging (MRI), inclusion of this as the sole modality in a diagnostic case definition  
11  
12  
13 271 would be problematic. At the start of the project, the following aims for consensus  
14  
15 272 definitions/statements were therefore defined:

- 16  
17  
18 273 1. They should be implementable in all centres across the UK, from a small district general  
19  
20 274 hospital to tertiary referral centres.  
21  
22 275 2. They should be highly specific (i.e. describe a typical definite case of NOE and minimise  
23  
24 276 the chances of misclassifying another condition), but not necessarily describe all  
25  
26 277 potential presentations of NOE.  
27  
28 278 3. They are for guidance only and not prescriptive in terms of practice.  
29  
30 279 4. They should allow standardised description of cases to facilitate recruitment to clinical  
31  
32 280 trials and comparison of cases across different cohorts.  
33  
34 281 5. They mark the start of an iterative process – as more, and better quality evidence  
35  
36 282 becomes available these definitions/statements will be revisited and revised.  
37  
38  
39  
40  
41  
42  
43  
44

45 283

## 46 284 **METHODS**

47  
48  
49 285 This project comprised of a systematic review of the literature, five iterative rounds of  
50  
51 286 consultation via a Delphi process, with UK specialists, expert in managing NOE as well as open  
52  
53 287 discussion within the collaborative. An expert panel analysed the results to produce the final  
54  
55  
56  
57  
58  
59  
60

1  
2  
3 288 guidance (Figure 1). Consent from participants was implicit in their taking part and their support  
4  
5  
6 289 for publication.  
7

8  
9 290 **(i) Systematic Review**  
10

11  
12 291 A systematic review of the literature for NOE was performed and reported according to PRISMA  
13  
14 292 guidelines(12) (*Takata et al, submitted*). The systematic review was registered on PROSPERO  
15  
16 293 (PROSPERO ID: CRD42020128957). The search identified all English language clinical papers  
17  
18 294 published on NOE. This revealed 422 publications, representing 16,528 patients. Sixty four  
19  
20 295 percent of these publications were excluded from further analysis as they either included less  
21  
22 296 than six patients and/or did not explicitly state the case definition applied. In the studies that  
23  
24 297 did describe a case definition, the criterion used varied widely. Of note, no studies specifically  
25  
26 298 addressing case definition were identified. The detailed results of this review will be published  
27  
28 299 as a separate manuscript.  
29  
30  
31  
32  
33

34 300

35  
36  
37 301 **(ii) Delphi method**  
38

39  
40 302 A Delphi method was used to reach consensus definitions for NOE, outcome definitions and key  
41  
42 303 consensus statements. The Delphi method is a structured, flexible process of obtaining  
43  
44 304 information from a group of experts by means of a series of questionnaires, each one refined  
45  
46 305 based on feedback from respondents on a previous version(13). This iterative, multistage  
47  
48 306 process is designed to transform opinion into group consensus, and is characterised by the  
49  
50 307 following features: anonymity, allowing opinions to be expressed free from group pressure,  
51  
52 308 iteration with controlled feedback from one round to the next, aggregation of group responses  
53  
54  
55  
56  
57  
58  
59  
60

1  
2  
3 309 and expert input until consensus has been achieved(14-18). The method is ideally suited to  
4  
5  
6 310 amalgamate the opinions of a broad range of stakeholders, which was important given the lack  
7  
8 311 of high-quality published evidence for NOE and the likely heterogeneity in practice across the  
9  
10 312 UK(6).

11  
12  
13 313

### 14 15 314 **(iii) Participants**

16  
17  
18 315 A core group of ENT, Infection and Radiology senior consultant specialists with a special interest  
19  
20 316 and expertise in NOE, set-up the UK NOE collaborative (MIA, ES, PP). This group, in consultation  
21  
22 317 with national speciality organisations including the British Infection Association (BIA), ENT UK  
23  
24 318 and the British Society for Otology (BSO) identified individuals with an interest in NOE, who  
25  
26 319 were then invited to participate in the Delphi process by email. The same corresponding email  
27  
28 320 address was used by the collaborative throughout the process and only one email address was  
29  
30 321 used for each participant to ensure only one response was logged for each participant at each  
31  
32 322 round. The questionnaire was set up and analysed on Google Forms. It was possible for the core  
33  
34 323 group to identify if participants had replied, but not how they had replied ensuring the  
35  
36 324 anonymity of the process. All participants consented to publishing the results. The core group  
37  
38 325 with other senior experts (PMD (ENT consultant), MMcN (Bone and Joint Infection Surgeon),  
39  
40 326 MW (Infection specialist)) facilitated the Delphi process and analysed the data(16).

41  
42  
43 327

### 44 45 328 **(iv) Definitions**

46  
47  
48  
49  
50  
51  
52  
53  
54  
55  
56  
57  
58  
59  
60

1  
2  
3 329 After a literature review, the core group proposed definitions for definite, possible and complex  
4  
5  
6 330 NOE as well as definitions for outcomes including cure, non-response to treatment and relapse.  
7  
8 331 They also proposed key consensus statements. These definitions and statements were shared  
9  
10 332 with participants in a survey via email. Participants were asked to rate the extent to which they  
11  
12 333 agreed with each definition/statement (strongly agree, agree, disagree, and strongly disagree)  
13  
14 334 on a Likert scale. The survey included the opportunity for individuals to comment after each  
15  
16 335 definition/statement and at the end of the survey. Participants were encouraged to feed back  
17  
18 336 on their reasons for disagreement or agreement with the proposed definitions/statements.  
19  
20  
21  
22 337  
23  
24  
25 338 Following each round, results were shared with participants with explanations for proposed  
26  
27 339 revisions to the definitions/statements from the expert group. The Delphi process comprised of  
28  
29 340 five rounds, all of which were conducted by electronic survey apart from Round 3, which took  
30  
31 341 the form of an in-person meeting.  
32  
33  
34

35 342

36  
37 343 **(v) Predefined consensus criteria**  
38  
39

40  
41 344 The following criteria were agreed for adoption of definitions/statements(19):  
42

- 43 345 • Minimum of 70% of respondents in agreement or strong agreement with a  
44  
45 346 definition/statement AND  
46  
47  
48 347 • <15% of respondents in disagreement or strong disagreement with a  
49  
50 348 definition/statement.  
51  
52  
53  
54  
55  
56  
57  
58  
59  
60

1  
2  
3 349 Definitions/statements that met these criteria were accepted. Definitions that did not meet  
4  
5  
6 350 these criteria at each round were modified according to feedback and included in subsequent  
7  
8 351 rounds. The Delphi process continued until consensus criteria were met for all  
9  
10 352 definitions/statements.

11  
12  
13 353

14  
15 354 **(vi) Wider stakeholder review**

16  
17  
18 355 The consensus case definitions/statements were shared with the BIA, ENT UK, BSO and the  
19  
20  
21 356 British Society of Neuroradiologists (BSNR).

22  
23  
24 357

25  
26 358 **(vii) Patient and Public Involvement Statement**

27  
28  
29 359 There was no public/patient involvement in this study.  
30  
31  
32  
33  
34  
35  
36  
37  
38  
39  
40  
41  
42  
43  
44  
45  
46  
47  
48  
49  
50  
51  
52  
53  
54  
55  
56  
57  
58  
59  
60

**RESULTS**

360 **RESULTS**

361

362 Email invitations explaining the objectives of the project and including the initial survey for

363 Round 1 were sent to ninety-three identified specialists in the UK, of whom seventy-four

364 responded (80%) (Figure 2). Individuals who engaged with Round 1 were invited to participate

365 in Round 2. Three individuals who had not participated in Rounds 1 and 2 attended and

366 participated in the meeting for Round 3. Participants who had engaged in any of Rounds 1, 2 or

367 3 were invited to participate in Rounds 4 and 5 in addition to three individuals who has not

368 been involved in the process prior to Round 4. The process took more than two years to

369 complete, and some individuals were no longer contactable by initial email, meaning the

370 number of possible respondents decreased for Round 5. The minimum response rate for a

371 Round was 76%. The survey questions for each Round and raw data can be viewed in

372 Supplementary Information which includes facilitator communiques with the collaborative (See

373 Supplementary files 1-9). Consensus criteria for all case definitions, outcome definitions and

374 consensus statements were met in Round 5. These are summarised in Tables 1, 2, 3 and 4. The

375 final consensus definitions and statements were endorsed by the BIA, ENT UK, BSO and BSNR.

376

377

378

379

380 **Table 1: Consensus definitions for NOE.** CRP = C reactive protein; ESR = erythrocyte  
 381 sedimentation rate.

### DEFINITIONS OF NOE

#### DEFINITE NOE

NOE is diagnosed if ALL of the following are present:

- Ootalgia and otorrhoea OR otalgia and a history of otorrhoea
- Granulation OR inflammation of the external auditory canal
- Histological exclusion of malignancy in cases where this is suspected
- Radiological features consistent with NOE:

(i) CT imaging findings of bony erosion of the external auditory canal, together with soft tissue inflammation of the external auditory canal OR

(ii) MRI with changes consistent with NOE (for example bone marrow oedema of the temporal bone with soft tissue inflammation of the external auditory canal)

#### POSSIBLE NOE

A severe infection of the external ear canal which does not show bony erosion of the external auditory canal on CT scan OR does not show changes consistent with NOE on MRI if this is performed (for example bone marrow oedema of the temporal bone) AND which has ALL of the following characteristics:

- Ootalgia and otorrhoea OR otalgia and a history of otorrhoea AND
- Granulation OR inflammation of the external auditory canal AND
- Any of the following features

(i) Immunodeficiency

(ii) Night pain

(iii) Raised inflammatory markers (ESR/CRP) in absence of other plausible cause

(iv) Failure to respond to >2 weeks of topical anti-infectives and aural care.

1  
2  
3 **402 Table 2: Definition of complex disease**  
4

5  
6 **403**  
7

8 **COMPLEX NOE**  
9

10  
11  
12  
13 Patients meeting the criteria for 'definite' NOE may be classified as 'complex' (or severe) IF  
14 ANY of the following are present:  
15

- 16 • Facial nerve or other lower cranial nerve palsy
- 17 • Cerebral venous thrombosis seen on MRI or contrast enhanced CT
- 18 • Extensive bone involvement as demonstrated by any of the following;  
19 (i) CT showing bone erosion in other skull base locations in addition to the external  
20 ear canal wall (for example around stylomastoid foramen, clivus, petrous apex,  
21 temporomandibular joint)  
22 (ii) MRI showing bone marrow oedema extending to central skull-base  
23 (iii) CT or MRI showing extensive soft tissue oedema or inflammation or fluid  
24 collection below the skull base  
25 (iv) Intracranial spread of the disease (for example dural thickening, extradural or  
26 subdural empyema, cerebral/cerebellar abscess).  
27  
28  
29  
30  
31  
32

33 **404**  
34

35 **405**  
36

37 **406**  
38

39 **407**  
40

41 **408**  
42

43 **409**  
44

45 **410**  
46

47 **411**  
48

49 **412**  
50

51 **413**  
52  
53  
54  
55  
56  
57  
58  
59  
60



414 **Table 3: Consensus definitions for treatment outcomes**

|     |                                                                                                                                                                                                                                                                    |
|-----|--------------------------------------------------------------------------------------------------------------------------------------------------------------------------------------------------------------------------------------------------------------------|
| 415 |                                                                                                                                                                                                                                                                    |
| 416 | <b>OUTCOME DEFINITIONS</b>                                                                                                                                                                                                                                         |
| 417 | <b>CURE</b>                                                                                                                                                                                                                                                        |
| 418 | A case of NOE is considered treated and cured if a patient has no pain or otorrhoea for a minimum period of <u>3 months</u> after completing antibiotic therapy.                                                                                                   |
| 419 | <b>RELAPSE</b>                                                                                                                                                                                                                                                     |
| 420 | Relapse is recurrence of disease after the patient has been treated and cured i.e. at least three months after stopping antibiotic therapy.                                                                                                                        |
| 421 | A relapsed case of NOE is a serious, invasive infection which occurs <b>after the initial infection was considered to be treated and cured</b> and is characterised by:                                                                                            |
| 422 | <b><i>Recurrence of local disease</i></b>                                                                                                                                                                                                                          |
| 423 | - Recurrent otalgia OR recurrent otorrhoea                                                                                                                                                                                                                         |
| 424 | AND                                                                                                                                                                                                                                                                |
| 425 | - Recurrent granulation OR inflammation                                                                                                                                                                                                                            |
| 426 | AND                                                                                                                                                                                                                                                                |
| 427 | - Unchanged or progression of bony erosion of the external auditory canal on CT OR unchanged or progression of MRI changes such as bone marrow oedema of the temporal bone and soft tissue changes of the external auditory canal                                  |
| 428 | AND/OR                                                                                                                                                                                                                                                             |
| 429 | <b><i>Development or recurrence of complex disease</i></b>                                                                                                                                                                                                         |
| 430 | - Development or worsening of a lower cranial nerve palsy, base of skull osteomyelitis or development or worsening of other intracranial complication deemed a consequence of NOE and supported by radiological imaging                                            |
| 431 | <b>NON RESPONSE TO THERAPY</b>                                                                                                                                                                                                                                     |
| 432 | A case of NOE is defined as non-responsive to therapy if there is no improvement in otalgia or otorrhoea or inflammation or granulation tissue in the EAC after 14 days of optimum analgesia, anti-infective therapy, aural care and optimisation of immune state. |
| 433 |                                                                                                                                                                                                                                                                    |
| 434 |                                                                                                                                                                                                                                                                    |
| 435 | ..                                                                                                                                                                                                                                                                 |

1  
2  
3 436 **Table 4: Consensus statements**  
4

5  
6 437 **FIRST LINE IMAGING**

7 CT Scan is the initial imaging modality of choice for a suspected case of NOE.  
8 438

9  
10 439 **MULTIDISCIPLINARY APPROACH**

11 Once a diagnosis of definite NOE has been made, specialist review as part of a multidisciplinary  
12 team approach should be arranged.  
13 440

14  
15 441 **NOMENCLATURE**

16 'Necrotising Otitis Externa' is the preferred name for this condition over 'Malignant Otitis  
17 Externa'  
18 442

19  
20 443

21  
22  
23 444

peer review only

1  
2  
3 4454  
5  
6 446 **DISCUSSION**7  
8 447

9  
10 448 This is the first published study which has sought to standardise diagnostic and outcome criteria  
11  
12 449 for NOE, following consultation with experts working in the field from three specialities: ENT,  
13  
14 450 Radiology and Infection. Consensus definitions/statements were obtained for all of the  
15  
16 451 identified areas set out by the expert group at the start of the project.  
17  
18  
19

20 452

21  
22 453 The Delphi process is an ideal method for the development of diagnostic criteria in the absence  
23  
24 454 of an available gold standard test or a robust evidence base(16), and has been used widely for  
25  
26 455 this purpose(14, 20-23). This method reduces bias, enhances transparency and allows the  
27  
28 456 involvement of individuals from diverse clinical backgrounds and dispersed geographical  
29  
30 457 locations. It also helps ensure that a single influential participant does not have a  
31  
32 458 disproportionate influence on the process. One potential disadvantage of this method is the  
33  
34 459 possible lack of individual responsibility and accountability, however in our work this was  
35  
36 460 addressed in part by in-person discussions and encouragement of feedback from individuals at  
37  
38 461 each round.  
39  
40  
41  
42  
43  
44

45 462

46  
47 463 A major barrier to the agreement of these definitions/statements was the ongoing SARSCoV2  
48  
49 464 Coronavirus Disease (COVID-19) pandemic at the time the Delphi process was being conducted.  
50  
51 465 This was a challenging time for all clinicians, especially Infection specialists, and as a result there  
52  
53 466 were delays in engaging some key stakeholders. Similarly, due to widespread physical  
54  
55  
56  
57  
58  
59  
60

1  
2  
3 467 distancing we were unable to convene a planned in-person meeting to discuss the final results.  
4  
5  
6 468 However, the consistent response rate of  $\geq 76\%$  for all rounds in our study is noteworthy and  
7  
8 469 should afford confidence in the final definitions/statements whilst acting as testament to the  
9  
10 470 commitment of UK specialists to improve outcomes for this neglected condition. For context,  
11  
12  
13 471 response rates to Delphi surveys are usually low; one review reported that a response rate of  
14  
15 472 35–40% is typical during a first round consultation with 15-18 participants and that surveys with  
16  
17 473 larger pools of participants tend to have lower response rates(24).  
18  
19

20 474  
21  
22 475 Discussion at the in-person meeting confirmed it was not clinically appropriate to have a binary  
23  
24 476 case definition for NOE given that currently available investigations cannot reliably distinguish  
25  
26 477 patients with NOE from those without. For this reason, a decision was made to include a case  
27  
28 478 definition for 'possible' NOE in the study outputs, to describe those patients without definitive  
29  
30 479 evidence of NOE but for whom clinical suspicion is still high. This approach has been applied  
31  
32 480 successfully in other infective conditions involving bone(25, 26). Infection of the EAC is likely a  
33  
34 481 continuum, with otitis externa and NOE extremes of the same disease process. Further work is  
35  
36 482 needed to understand 'possible' NOE, the investigations that reliably distinguish these cases  
37  
38 483 from definite NOE and the variables that determine the outcome of such cases.  
39  
40  
41  
42  
43  
44

45 484  
46  
47 485 The final consensus definitions for NOE adopted by the group include symptoms, signs and  
48  
49 486 radiological changes as obligatory criteria. Specific radiological abnormalities are a relatively  
50  
51 487 objective measure which can be standardised across sites and assessed in future work. Whilst  
52  
53 488 the ideal modality to diagnose NOE is debated(27-29), we chose to only include radiological  
54  
55  
56  
57  
58  
59  
60

## UK Definitions for NOE

1  
2  
3 489 changes on computer tomography (CT) and MRI, given these modalities are most widely  
4  
5  
6 490 available in the UK.

7  
8 491  
9  
10 492 Otagia and the presence of granulation tissue or inflammation in the EAC were considered  
11  
12  
13 493 essential for diagnosis of a definite case in our definition. In contrast, only 78% and 76% of  
14  
15 494 studies respectively were found to consider these features obligatory criteria in our systematic  
16  
17  
18 495 review (*Takata et al, submitted*). It is possible that our definition may be less sensitive and will  
19  
20 496 wrongly exclude 'true' cases of NOE, without visible EAC changes or without pain. However, our  
21  
22  
23 497 definition is a starting point, which will evolve as data from a planned UK, multicentre  
24  
25 498 observational study of NOE (Improving outcomes in NOE (IONOE)) and other studies emerge.

26  
27  
28 499  
29  
30 500 The role of the multidisciplinary team (MDT) working in the improvement of patient outcomes  
31  
32 501 is well known(30-32). In the management of complex orthopaedic infections, time to diagnosis  
33  
34  
35 502 and clinical outcomes have both been shown to improve when MDTs function well(33, 34). The  
36  
37  
38 503 benefits of an MDT approach are multifactorial; patients benefit from care that is co-ordinated,  
39  
40 504 individualised and delivered by experts; clinicians benefit by having increased exposure to a  
41  
42 505 larger number of cases which improves expertise; and the Unit benefits as the improvements in  
43  
44  
45 506 outcomes build morale(30). There are sparse data addressing the benefit of MDT working on  
46  
47 507 outcomes for NOE. However, a UK study by Sharma *et al.*, has shown that an MDT approach  
48  
49  
50 508 resulted in a shorter duration of therapy and lower mean hospital length of stay for NOE  
51  
52 509 patients(35). In our study there was strong support for an MDT model to manage NOE, but  
53  
54  
55 510 concern that this would not be realistically achievable in the absence of dedicated local funding.

1  
2  
3 511  
4  
5  
6 512 The term 'malignant otitis externa' (MOE) was first coined by Chandler in 1968 when reporting  
7  
8 513 the first case series of severe temporal bone osteomyelitis, originating from the EAC, associated  
9  
10 514 with *Pseudomonas aeruginosa* infection(36). Later the term 'NOE' was introduced(37). The  
11  
12  
13 515 terms MOE and NOE have since been used interchangeably to describe the condition. Whilst  
14  
15 516 the terms 'necrotising' and 'malignant' convey the aggressive and serious nature of the  
16  
17  
18 517 condition, they are both recognised to be misnomers in that they do not describe the  
19  
20 518 pathophysiology of the condition. It was proposed and accepted that since malignancy is an  
21  
22  
23 519 important differential for this condition, it was preferable to use the term 'necrotising otitis  
24  
25 520 externa'.

26  
27  
28 521  
29  
30 522 This is the first published study which has sought to standardise diagnostic and outcome criteria  
31  
32  
33 523 for NOE, following consultation with experts. However, the results should be interpreted in the  
34  
35 524 context of the limitations of the methods used. We tried to recruit broadly, but may have  
36  
37  
38 525 inadvertently missed some specialists. The data is collected from UK based clinicians which may  
39  
40 526 limit broader application of results. The decisions by the core group were led by the results of  
41  
42 527 each round, which including comments by the participants, so reducing any risk of bias.  
43  
44

45 528

## 47 529 **Conclusion**

48  
49  
50 530 This work distils the clinical opinion of a large group of multidisciplinary specialists from across  
51  
52 531 the UK to create practical definitions and statements to support clinical practice and research  
53  
54  
55  
56  
57  
58  
59  
60

*UK Definitions for NOE*

1  
2  
3 532 for NOE. This is the first step in an iterative process. Further work will seek to validate and test  
4  
5  
6 533 these definitions and inform their evolution.  
7

8 534  
9  
10  
11  
12  
13  
14  
15  
16  
17  
18  
19  
20  
21  
22  
23  
24  
25  
26  
27  
28  
29  
30  
31  
32  
33  
34  
35  
36  
37  
38  
39  
40  
41  
42  
43  
44  
45  
46  
47  
48  
49  
50  
51  
52  
53  
54  
55  
56  
57  
58  
59  
60

1  
2  
3  
4  
5  
6  
7  
8  
9  
10  
11  
12  
13  
14  
15  
16  
17  
18  
19  
20  
21  
22  
23  
24  
25  
26  
27  
28  
29  
30  
31  
32  
33  
34  
35  
36  
37  
38  
39  
40  
41  
42  
43  
44  
45  
46  
47  
48  
49  
50  
51  
52  
53  
54  
55  
56  
57  
58  
59  
60

535 **FIGURE LEGENDS**

536

537 **Figure 1.** Overview of process to develop consensus case definitions and statements for NOE

538

539 **Figure 2.** Rounds in Delphi process showing response rate (RR) for each Round and speciality

540 involvement

541

542

For peer review only



*UK Definitions for NOE*

1  
2  
3  
4  
5  
6  
7  
8  
9  
10  
11  
12  
13  
14  
15  
16  
17  
18  
19  
20  
21  
22  
23  
24  
25  
26  
27  
28  
29  
30  
31  
32  
33  
34  
35  
36  
37  
38  
39  
40  
41  
42  
43  
44  
45  
46  
47  
48  
49  
50  
51  
52  
53  
54  
55  
56  
57  
58  
59  
60

543

544

For peer review only

1  
2  
3  
4  
5  
6  
7  
8  
9  
10  
11  
12  
13  
14  
15  
16  
17  
18  
19  
20  
21  
22  
23  
24  
25  
26  
27  
28  
29  
30  
31  
32  
33  
34  
35  
36  
37  
38  
39  
40  
41  
42  
43  
44  
45  
46  
47  
48  
49  
50  
51  
52  
53  
54  
55  
56  
57  
58  
59  
60

545

For peer review only

1  
2  
3 546 **a) CONTRIBUTORSHIP**  
4

5 547 The conception and design of the work was done by SHH, MK, PM-D, ES, MW, PP, MAM, MIA.  
6 548 The data collection was done by SHH, MK, MPS, MIA, UK NOE Collaborative. The data analysis  
7 549 and interpretation was done by SHH, MIA, MK, ES, PMD, MW, PP. The first draft of the paper  
8 550 was done by SHH, MIA. The article was critically reviewed and revised by SHH, MK, MPS, PMD,  
9 551 ES, MW, PP, MAM, MIA and the UK NOE Collaborative  
10  
11

12 552

13 553 **b) FUNDING STATEMENT**

14 554 The authors declare that this study has not received any financial support  
15 555

16 556

17 556 **c) COMPETING OF INTERESTS T**

18  
19 557 The authors do not have any conflict of interest to declare  
20 558

21 559

22 559 **d) ETHICS APPROVAL**

23 560 We sought advice from the chair of the Oxford University Hospitals Joint Research Office  
24 561 Study Classification Group who considered that the Delphi panel did not require formal ethical  
25 562 approval.  
26 563

27 563

28 564 **e) DATA SHARING**

29  
30 565 Raw data from the study are supplied as Supplementary files.  
31 566  
32 567  
33 568  
34 568  
35 569  
36 570  
37 571  
38 572  
39 573  
40 574  
41 575  
42 576  
43 577  
44 578  
45 579  
46 580  
47 581  
48 582  
49 583  
50 584  
51 585  
52 586  
53  
54  
55  
56  
57  
58  
59  
60

587

588 **REFERENCES**

589

- 590 1. Rubin Grandis J, Branstetter Bft, Yu VL. The changing face of malignant (necrotising)  
591 external otitis: clinical, radiological, and anatomic correlations. *Lancet Infect Dis.* 2004;4(1):34-  
592 9.
- 593 2. Mahdyoun P, Pulcini C, Gahide I, Raffaelli C, Savoldelli C, Castillo L, et al. Necrotizing  
594 otitis externa: a systematic review. *Otol Neurotol.* 2013;34(4):620-9.
- 595 3. Byun YJ, Patel J, Nguyen SA, Lambert PR. Necrotizing Otitis Externa: A Systematic Review  
596 and Analysis of Changing Trends. *Otol Neurotol.* 2020;41(8):1004-11.
- 597 4. Stern Shavit S, Soudry E, Hamzany Y, Nageris B. Malignant external otitis: Factors  
598 predicting patient outcomes. *Am J Otolaryngol.* 2016;37(5):425-30.
- 599 5. Hasibi M, Ashtiani MK, Motassadi Zarandi M, Yazdani N, Borghei P, Kuhi A, et al. A  
600 Treatment Protocol for Management of Bacterial and Fungal Malignant External Otitis: A Large  
601 Cohort in Tehran, Iran. *Ann Otol Rhinol Laryngol.* 2017;126(7):561-7.
- 602 6. Chawdhary G, Pankhania M, Douglas S, Bottrill I. Current management of necrotising  
603 otitis externa in the UK: survey of 221 UK otolaryngologists. *Acta Otolaryngol.* 2017;137(8):818-  
604 22.
- 605 7. Cohen D, Friedman P. The diagnostic criteria of malignant external otitis. *J Laryngol Otol.*  
606 1987;101(3):216-21.
- 607 8. Stahlmann R, Lode H. Safety considerations of fluoroquinolones in the elderly: an  
608 update. *Drugs Aging.* 2010;27(3):193-209.
- 609 9. Bernstein JM, Holland NJ, Porter GC, Maw AR. Resistance of *Pseudomonas* to  
610 ciprofloxacin: implications for the treatment of malignant otitis externa. *J Laryngol Otol.*  
611 2007;121(2):118-23.
- 612 10. Rehman A, Patrick WM, Lamont IL. Mechanisms of ciprofloxacin resistance in  
613 *Pseudomonas aeruginosa*: new approaches to an old problem. *J Med Microbiol.* 2019;68(1):1-  
614 10.
- 615 11. Wee I, Chin B, Syn N, Lee KS, Ng JJ, Choong A. The association between fluoroquinolones  
616 and aortic dissection and aortic aneurysms: a systematic review and meta-analysis. *Sci Rep.*  
617 2021;11(1):11073.
- 618 12. Page MJ, McKenzie JE, Bossuyt PM, Boutron I, Hoffmann TC, Mulrow CD, et al. The  
619 PRISMA 2020 statement: an updated guideline for reporting systematic reviews. *BMJ.*  
620 2021;372:n71.
- 621 13. Moher D, Schulz KF, Simera I, Altman DG. Guidance for developers of health research  
622 reporting guidelines. *PLoS Med.* 2010;7(2):e1000217.
- 623 14. Mitha A, Boulyana M, Hue V, Pruvost I, Martinot A, European French-speaking expert g,  
624 et al. Consensus in diagnostic definitions for bone or joint infections in children by a Delphi  
625 method with European French-speaking experts. *Acta Paediatr.* 2012;101(8):e350-6.
- 626 15. Windle PE. Delphi technique: assessing component needs. *J Perianesth Nurs.*  
627 2004;19(1):46-7.
- 628 16. Eibling D, Fried M, Blitzer A, Postma G. Commentary on the role of expert opinion in  
629 developing evidence-based guidelines. *Laryngoscope.* 2014;124(2):355-7.

## UK Definitions for NOE

17. Beiderbeck D, Frevel N, von der Gracht HA, Schmidt SL, Schweitzer VM. Preparing, conducting, and analyzing Delphi surveys: Cross-disciplinary practices, new directions, and advancements. *MethodsX*. 2021;8:101401.
18. Bhandari S. HMR. Identifying and Controlling Biases in Expert-Opinion Research: Guidelines for Variations of Delphi, Nominal Group Technique, and Focus Groups. *Journal of Management in Engineering*. 2021;37(3 (May 2021)).
19. Diamond IR, Grant RC, Feldman BM, Pencharz PB, Ling SC, Moore AM, et al. Defining consensus: a systematic review recommends methodologic criteria for reporting of Delphi studies. *J Clin Epidemiol*. 2014;67(4):401-9.
20. Olszewska E, Rutkowska J, Ozgirgin N. Consensus-Based Recommendations on the Definition and Classification of Cholesteatoma. *J Int Adv Otol*. 2015;11(1):81-7.
21. Weir NM, Pattison SH, Kearney P, Stafford B, Gormley GJ, Crockard MA, et al. Criteria required for an acceptable point-of-care test for UTI detection: Obtaining consensus using the Delphi technique. *PLoS One*. 2018;13(6):e0198595.
22. Yung M, Tono T, Olszewska E, Yamamoto Y, Sudhoff H, Sakagami M, et al. EAONO/JOS Joint Consensus Statements on the Definitions, Classification and Staging of Middle Ear Cholesteatoma. *J Int Adv Otol*. 2017;13(1):1-8.
23. Rybak YE, Lai KSP, Ramasubbu R, Vila-Rodriguez F, Blumberger DM, Chan P, et al. Treatment-resistant major depressive disorder: Canadian expert consensus on definition and assessment. *Depress Anxiety*. 2021;38(4):456-67.
24. Lewin SR, Attoye T, Bansbach C, Doehle B, Dube K, Dybul M, et al. Multi-stakeholder consensus on a target product profile for an HIV cure. *Lancet HIV*. 2021;8(1):e42-e50.
25. Metsemakers WJ, Morgenstern M, McNally MA, Moriarty TF, McFadyen I, Scarborough M, et al. Fracture-related infection: A consensus on definition from an international expert group. *Injury*. 2018;49(3):505-10.
26. McNally M, Sousa R, Wouthuyzen-Bakker M, Chen AF, Soriano A, Vogely HC, et al. The EBJS definition of periprosthetic joint infection. *Bone Joint J*. 2021;103-B(1):18-25.
27. Morales RE, Eisenman DJ, Raghavan P. Imaging Necrotizing Otitis Externa. *Semin Roentgenol*. 2019;54(3):215-26.
28. van Kroonenburgh A, van der Meer WL, Bothof RJP, van Tilburg M, van Tongeren J, Postma AA. Advanced Imaging Techniques in Skull Base Osteomyelitis Due to Malignant Otitis Externa. *Curr Radiol Rep*. 2018;6(1):3.
29. Mehrotra P, Elbadawey MR, Zammit-Maempel I. Spectrum of radiological appearances of necrotising external otitis: a pictorial review. *J Laryngol Otol*. 2011;125(11):1109-15.
30. Epstein NE. Multidisciplinary in-hospital teams improve patient outcomes: A review. *Surg Neurol Int*. 2014;5(Suppl 7):S295-303.
31. Ndoro S. Effective multidisciplinary working: the key to high-quality care. *Br J Nurs*. 2014;23(13):724-7.
32. Prades J, Remue E, van Hoof E, Borrás JM. Is it worth reorganising cancer services on the basis of multidisciplinary teams (MDTs)? A systematic review of the objectives and organisation of MDTs and their impact on patient outcomes. *Health Policy*. 2015;119(4):464-74.
33. Prendki V, Zeller V, Passeron D, Desplaces N, Mamoudy P, Stirnemann J, et al. Outcome of patients over 80 years of age on prolonged suppressive antibiotic therapy for at least 6 months for prosthetic joint infection. *Int J Infect Dis*. 2014;29:184-9.

- 1  
2  
3 674 34. Ibrahim MS, Raja S, Khan MA, Haddad FS. A multidisciplinary team approach to two-  
4 675 stage revision for the infected hip replacement: a minimum five-year follow-up study. Bone  
5 676 Joint J. 2014;96-B(10):1312-8.  
6  
7 677 35. Sharma S, Corrah T, Singh A. Management of Necrotizing Otitis Externa: Our Experience  
8 678 with Forty-Three Patients. J Int Adv Otol. 2017;13(3):394-8.  
9 679 36. Chandler JR. Malignant external otitis. Laryngoscope. 1968;78(8):1257-94.  
10  
11 680 37. Kohut RI, Lindsay JR. Necrotizing ("malignant") external otitis histopathologic processes.  
12 681 Ann Otol Rhinol Laryngol. 1979;88(5 Pt 1):714-20.  
13 682  
14  
15 683

For peer review only

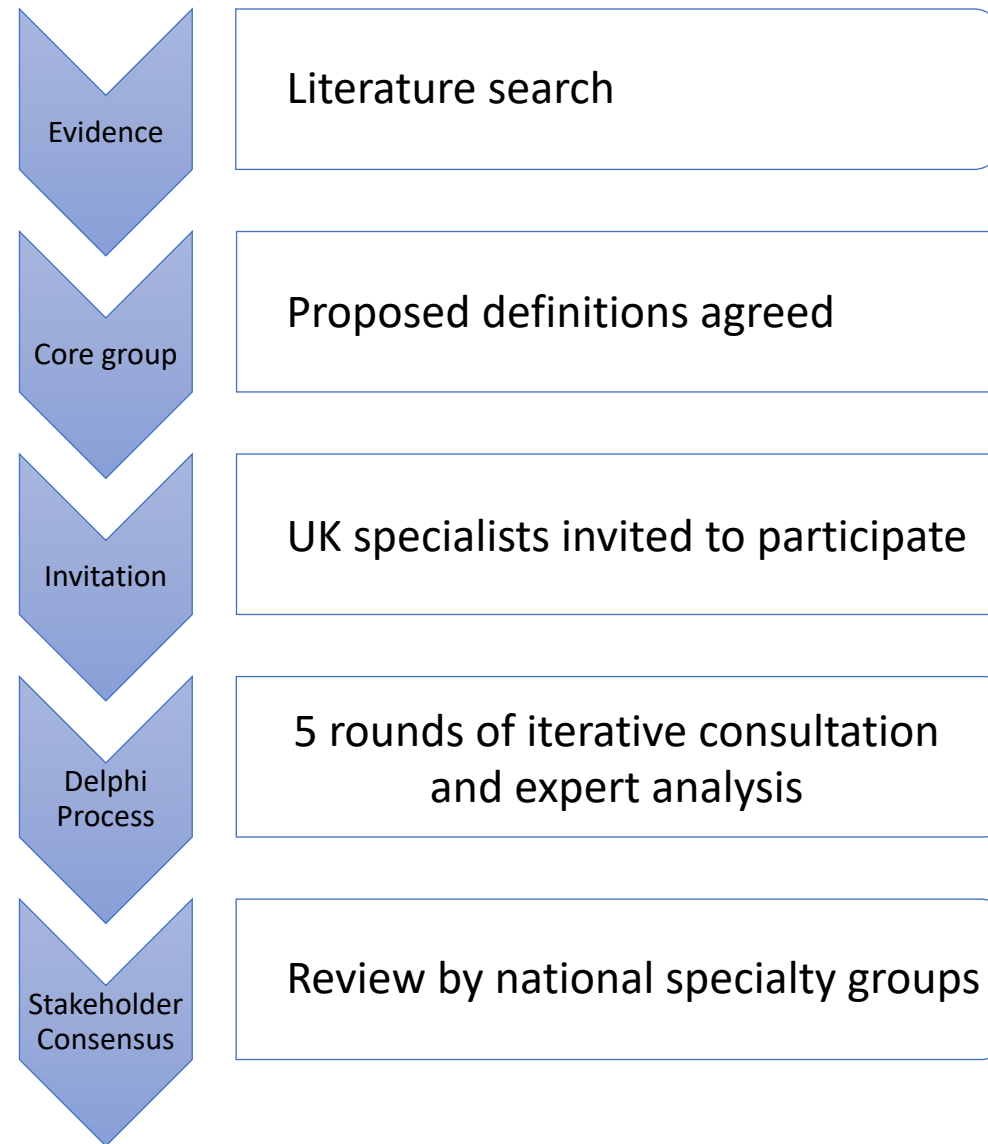

1  
2  
3  
4  
5  
6  
7  
8  
9  
10  
11  
12  
13  
14  
15  
16  
17  
18  
19  
20  
21  
22  
23  
24  
25  
26  
27  
28  
29  
30  
31  
32  
33  
34  
35  
36  
37  
38  
39  
40  
41

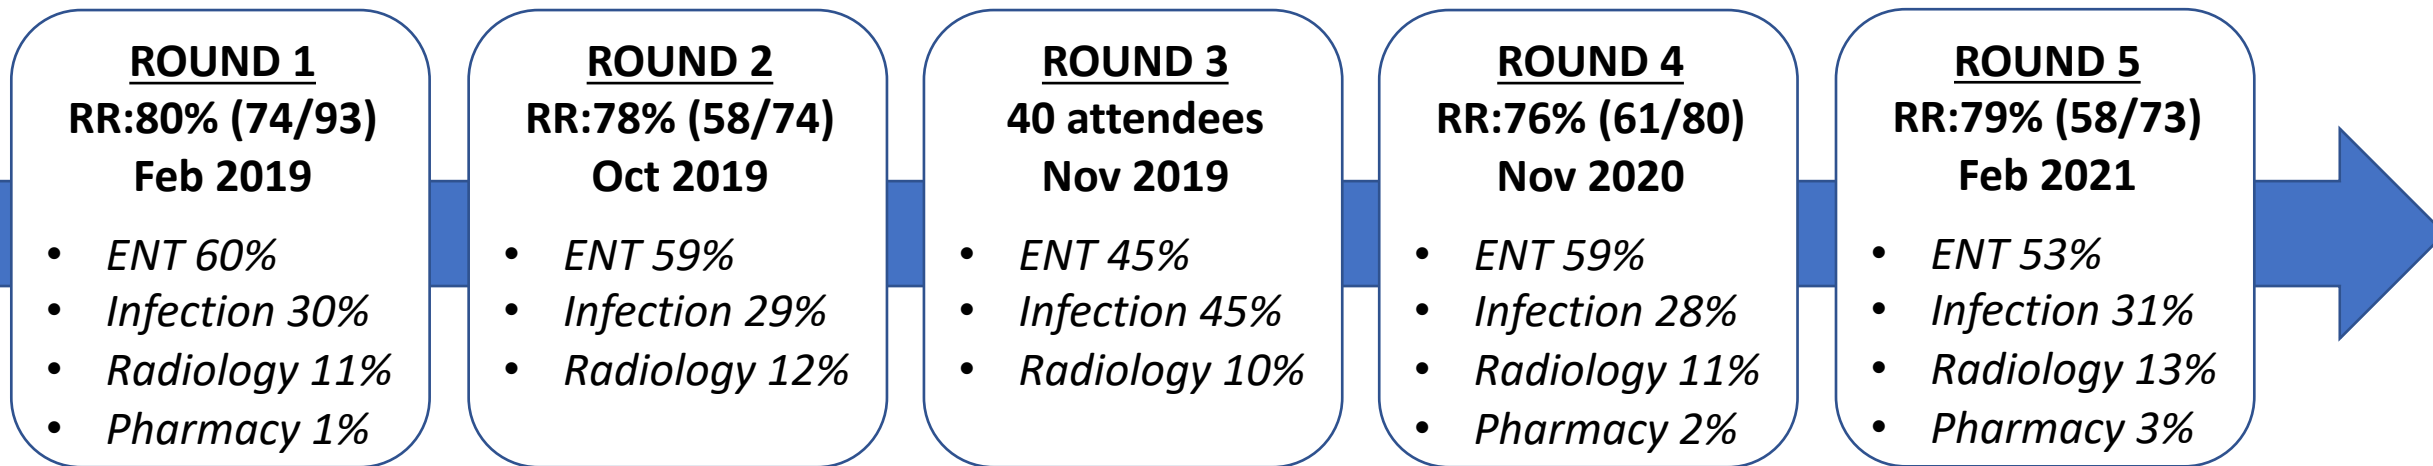



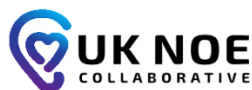

## DELPHI ROUND 1 – RESULTS FEBRUARY 2019

Response Rate: 84% (74/93)

### Part 1: DEFINITE NOE

A true case of DEFINITE NOE will have the following features

1a. Symptoms: MAJOR symptoms - necessarily present for all definite cases of NOE: \*

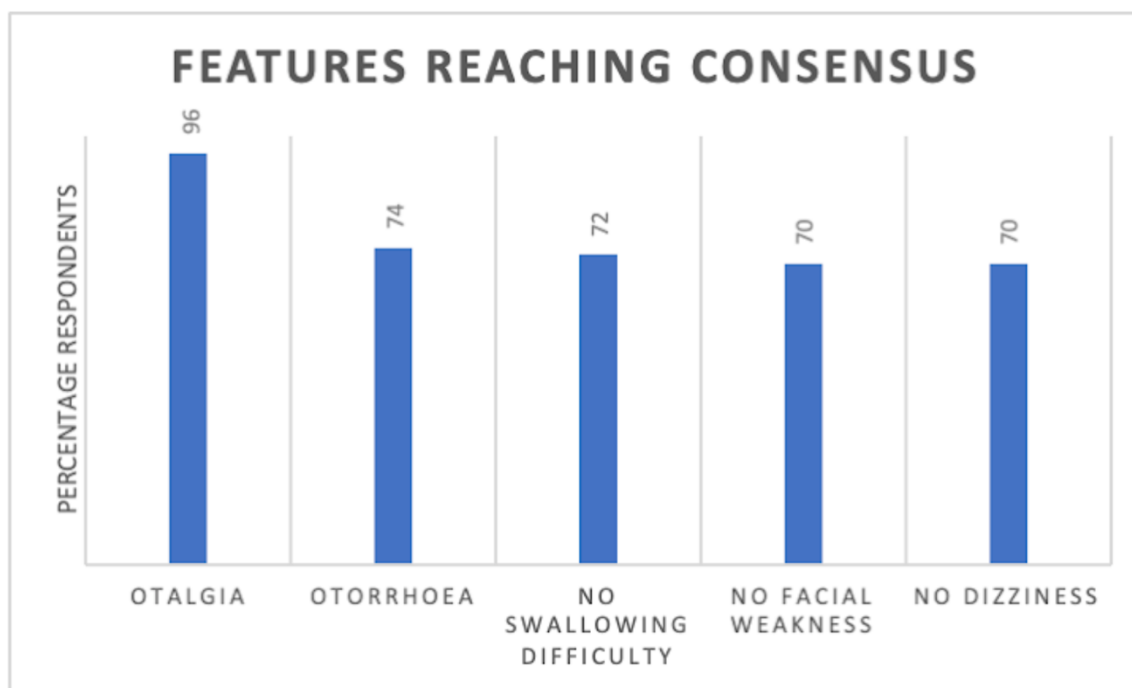

1  
2  
3  
4  
5  
6  
7  
8  
9  
10  
11  
12  
13  
14  
15  
16  
17  
18  
19  
20  
21  
22  
23  
24  
25  
26  
27  
28  
29  
30  
31  
32  
33  
34  
35  
36  
37  
38  
39  
40  
41  
42  
43  
44  
45  
46  
47  
48  
49  
50  
51  
52  
53  
54  
55  
56  
57  
58  
59  
60

1b. Symptoms: MINOR symptoms - which MAY be present for all definite cases of NOE: \*

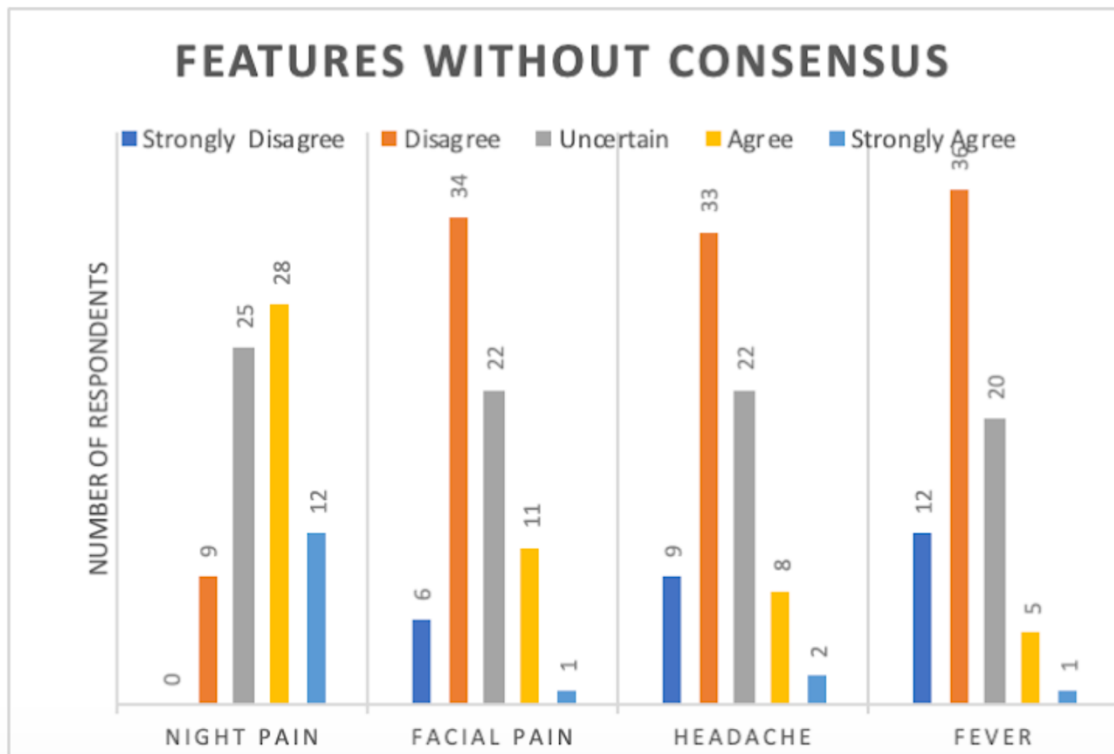

2. A true case of DEFINITE NOE will have the following clinical signs: \*

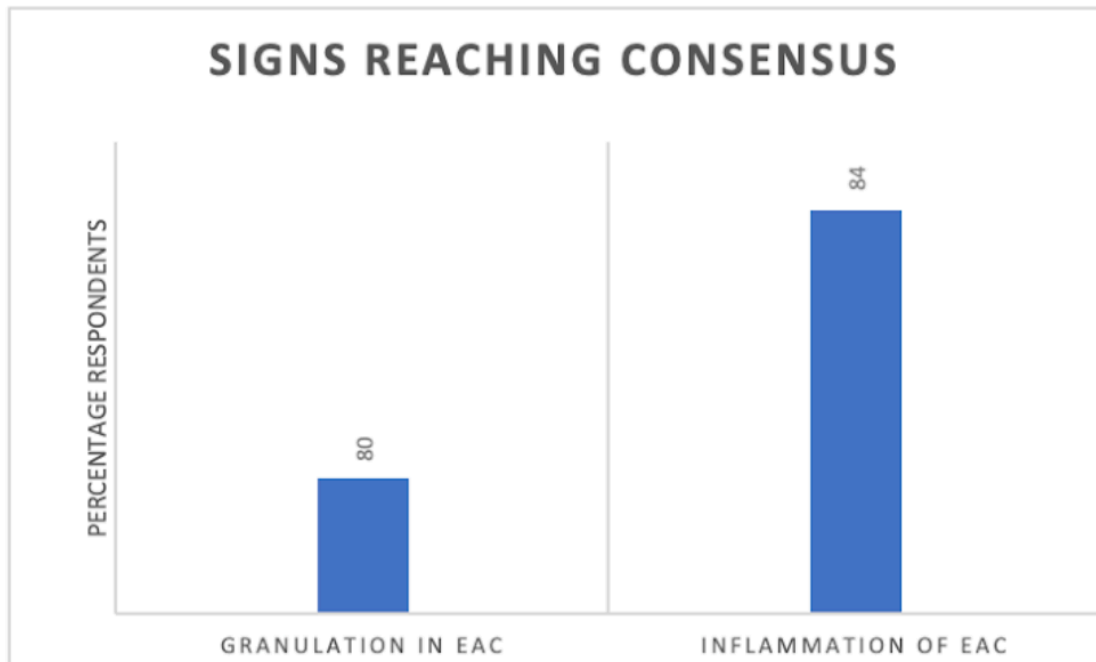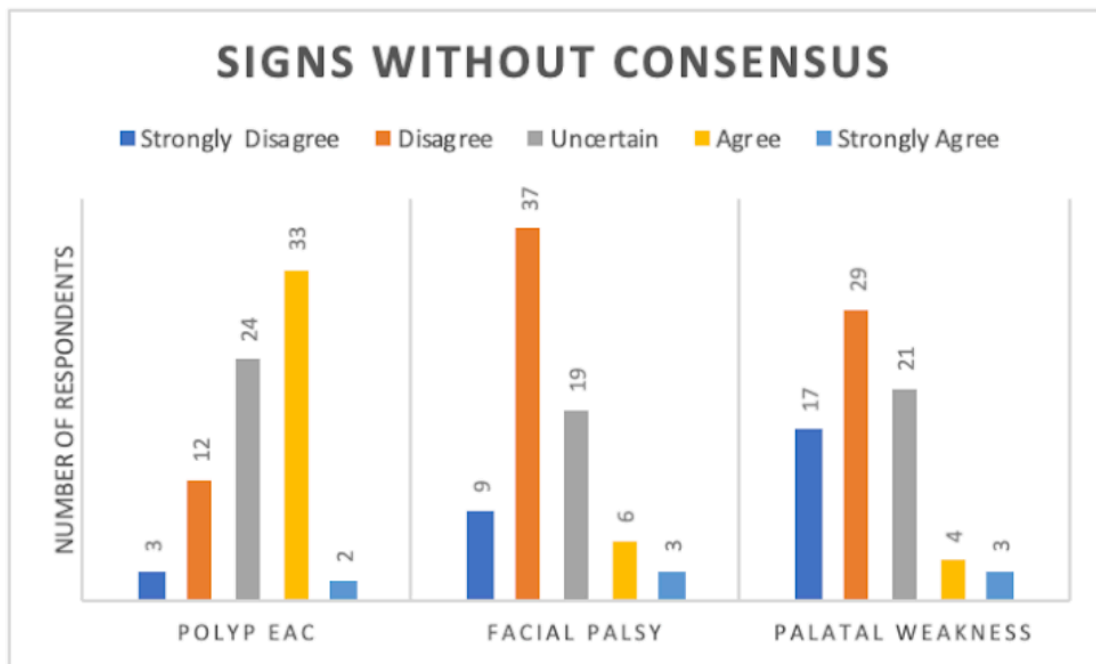

3. A true case of DEFINITE NOE will have the following findings on imaging: \*

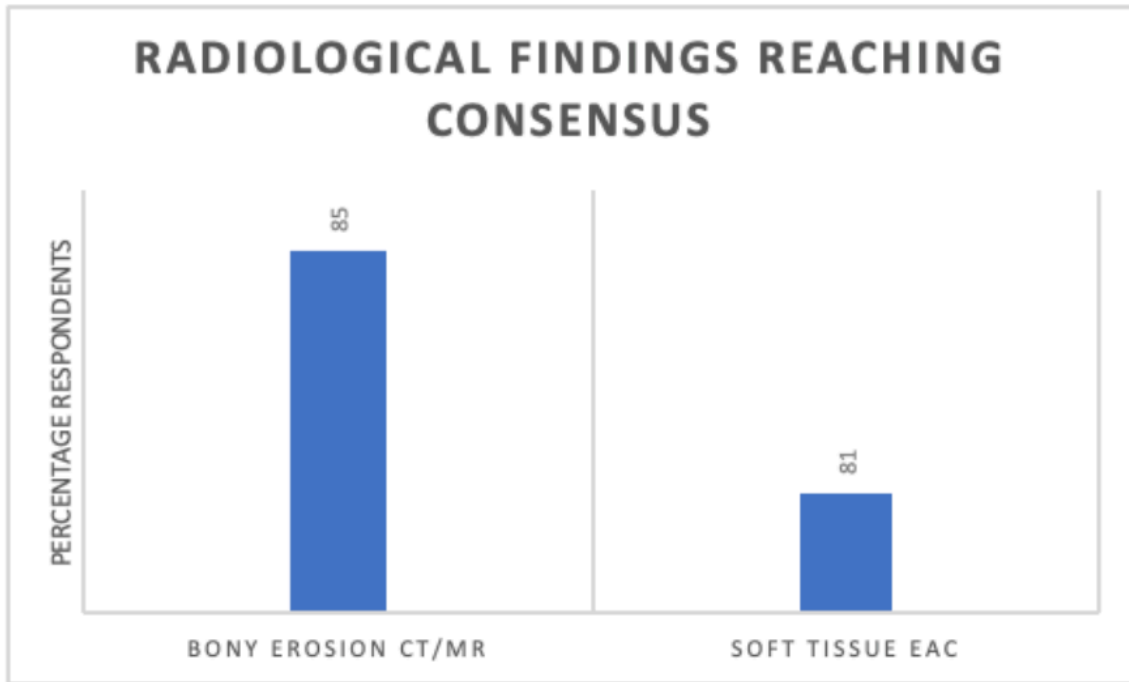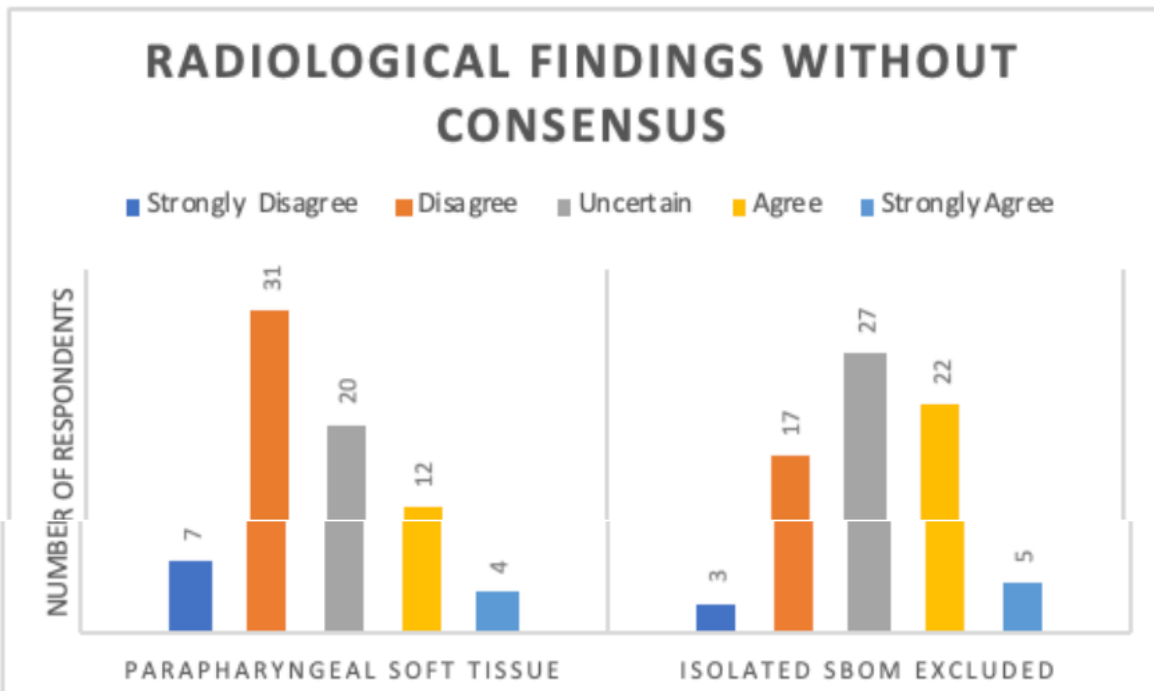

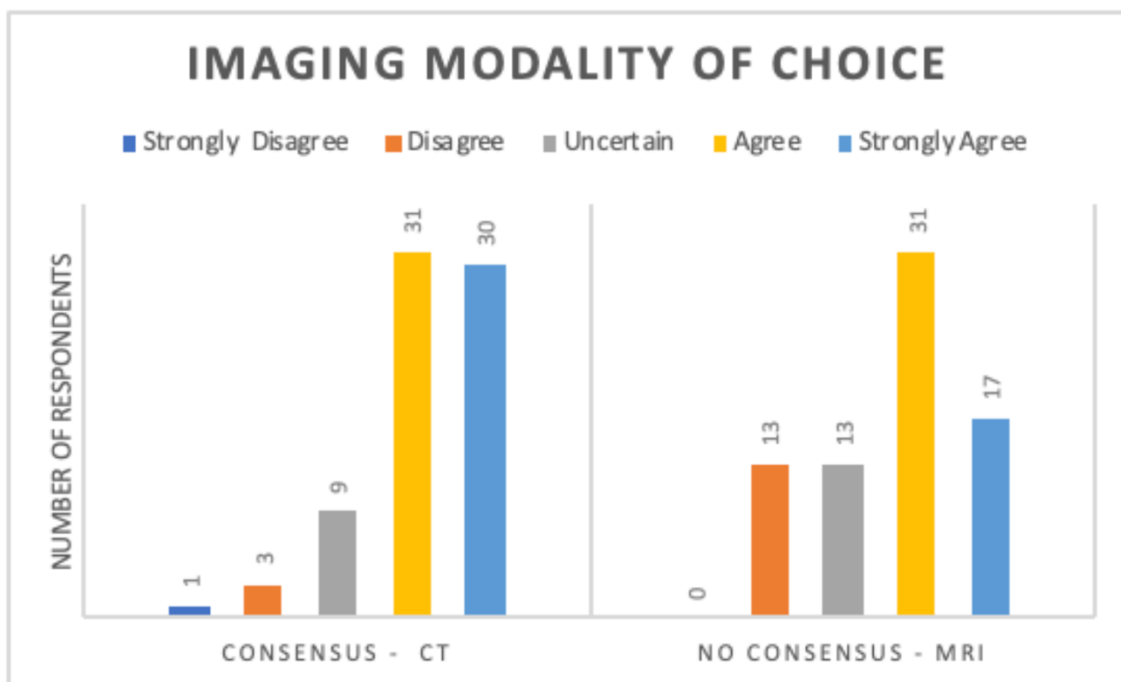

4a. INVESTIGATION: A true case of DEFINITE NOE will have the following findings on histology: \*

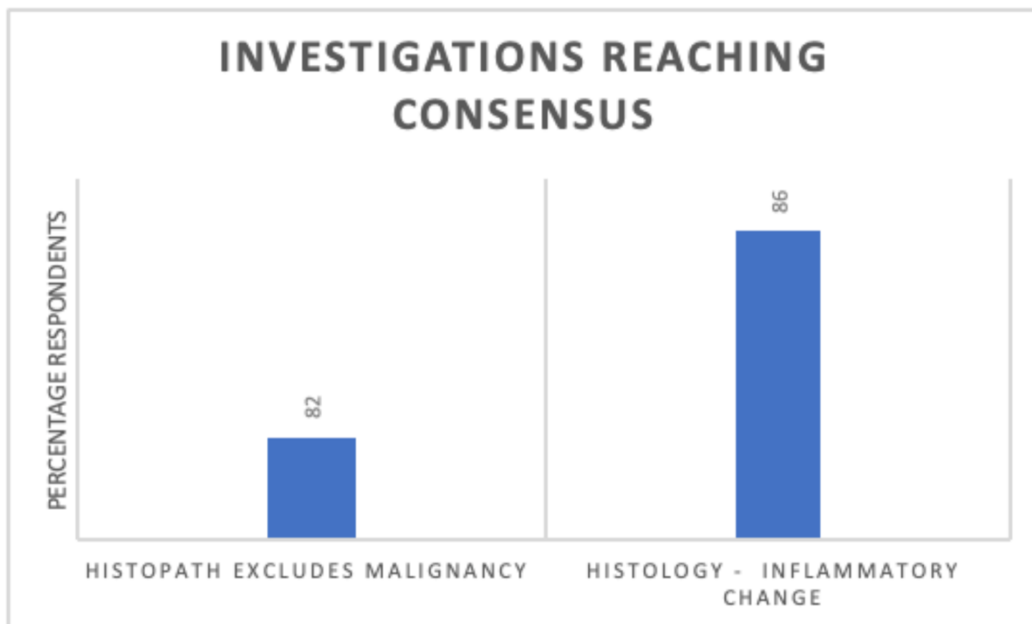

4b. INVESTIGATION: A true case of DEFINITE NOE will have the following biochemistry/haematology findings: \*

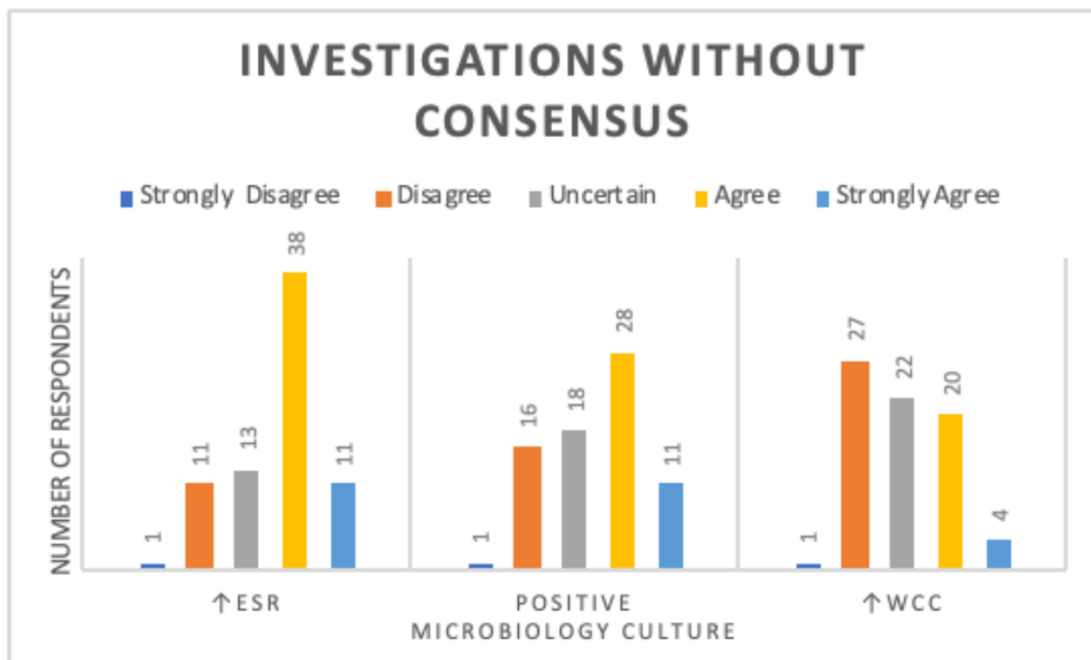

5. Regarding risk factors for DEFINITE NOE: \*

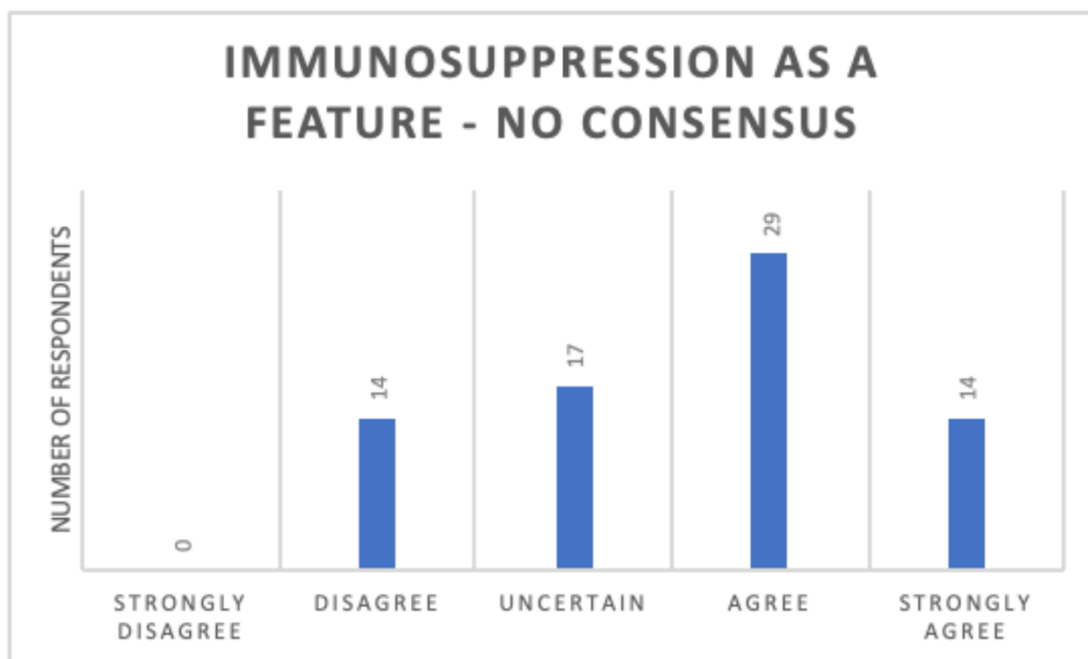

Part 2: Clinical  
Diagnosis &  
Investigation of  
Cases of  
PROBABLE NOE

This definition covers those cases that do not meet ALL the criteria for definite NOE, but needs to be differentiated from severe OE. They are not the cases in whom further testing is awaited, but this constitutes a final diagnosis. This definition is important because it will impact antibiotic management.

A true case of probable NOE will have the following features:

13. 1a. Symptoms: MAJOR symptoms - necessarily present for all probable cases of NOE: \*

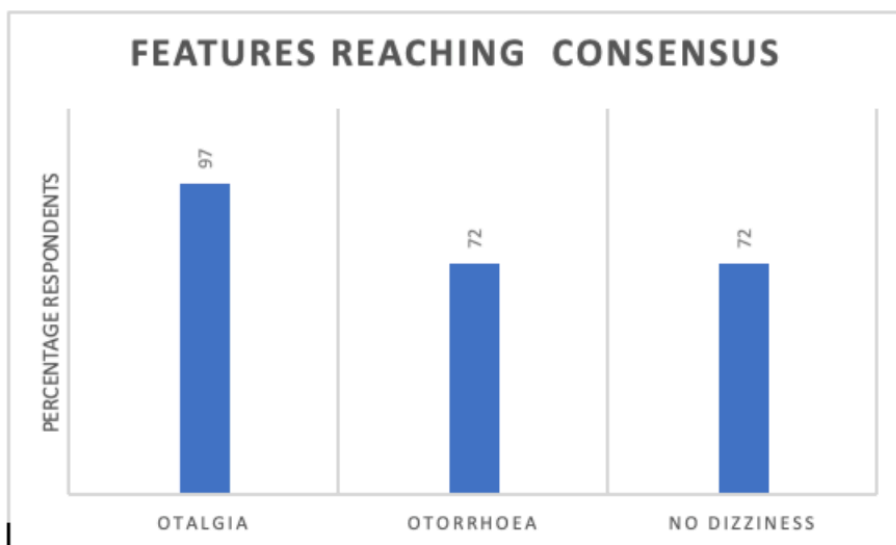

- 1b. Symptoms: MINOR symptoms - which MAY be present for all probable cases of NOE: \*

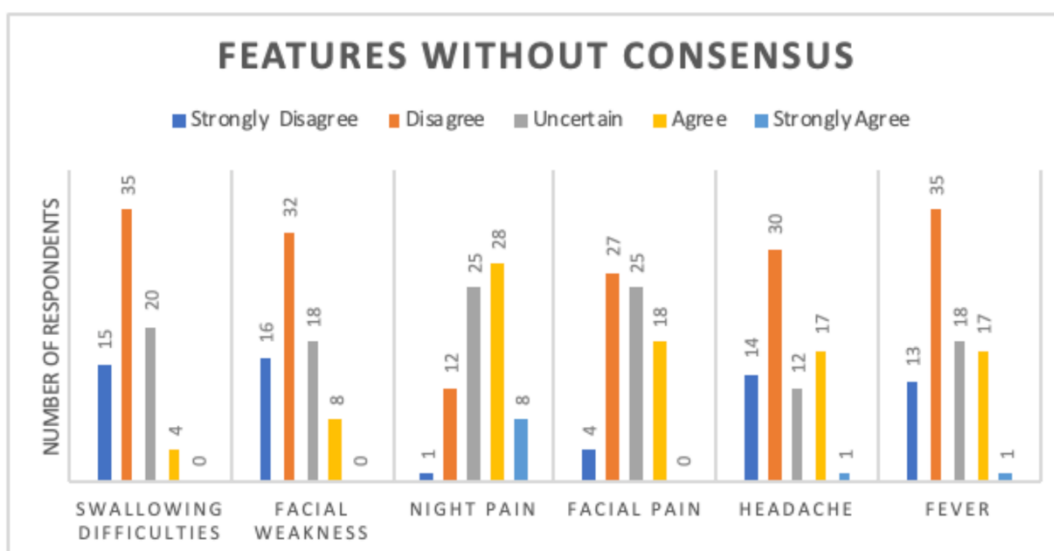

2. A case of PROBABLE NOE will have the following clinical signs: \*

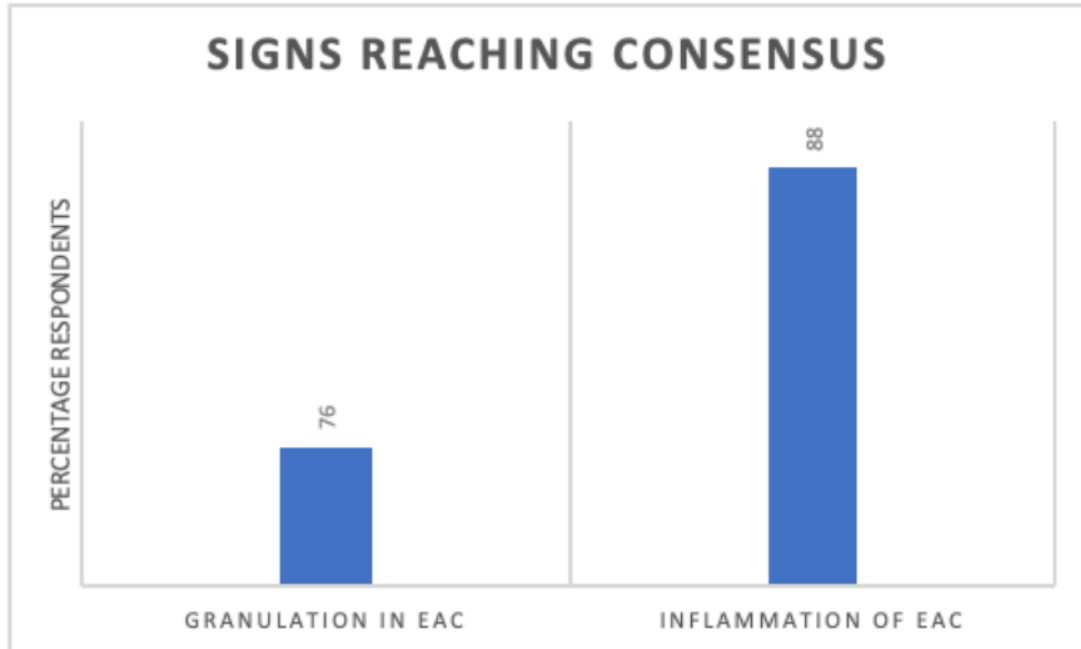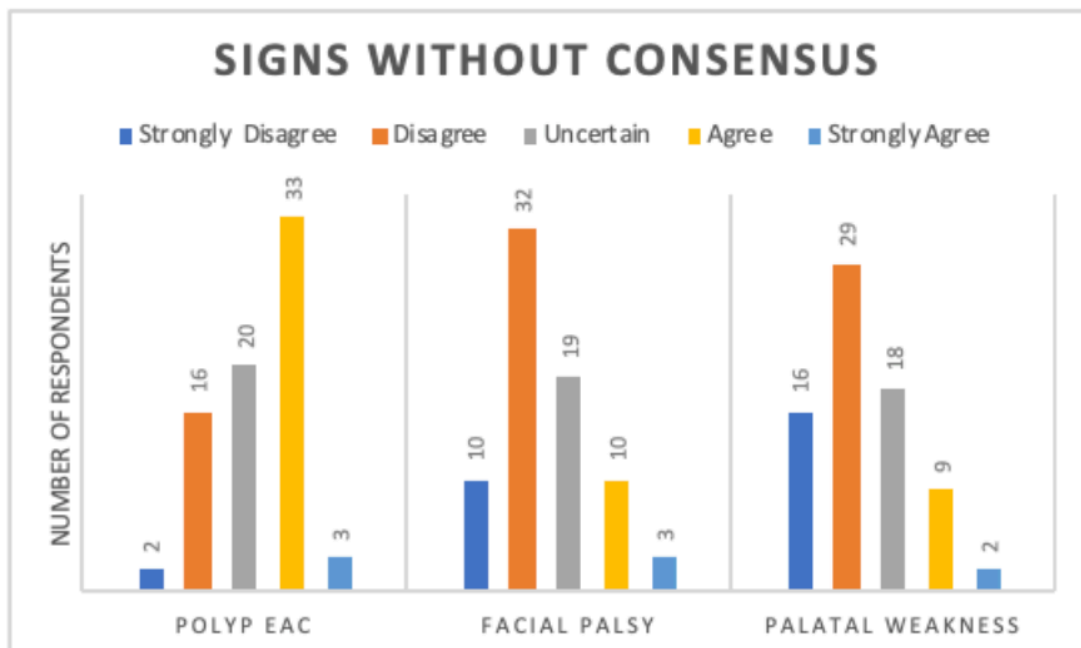



3. A case of PROBABLE NOE will have the following findings on imaging: \*

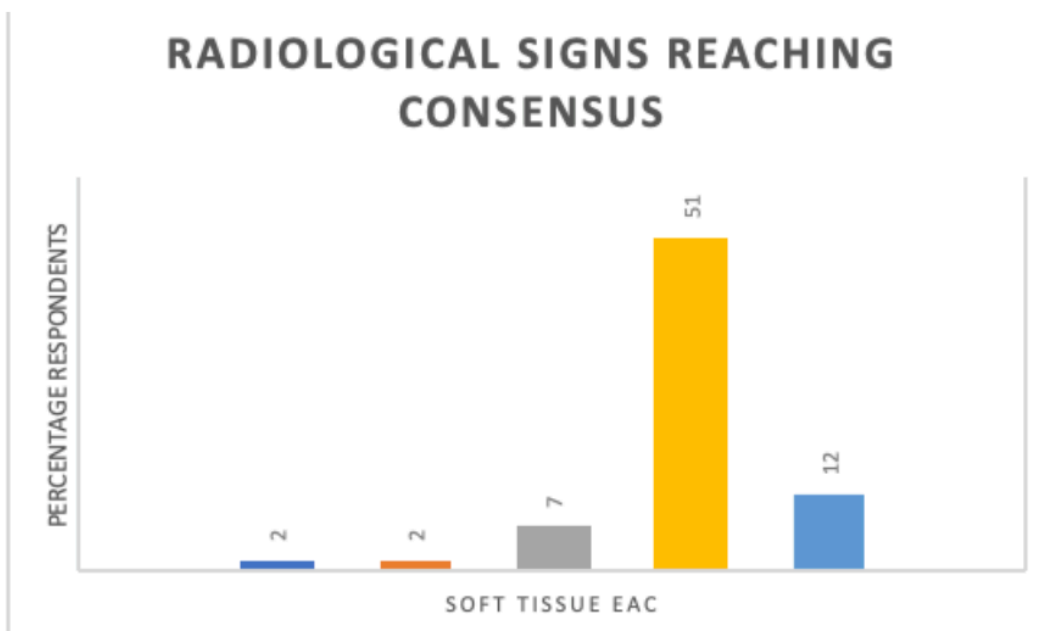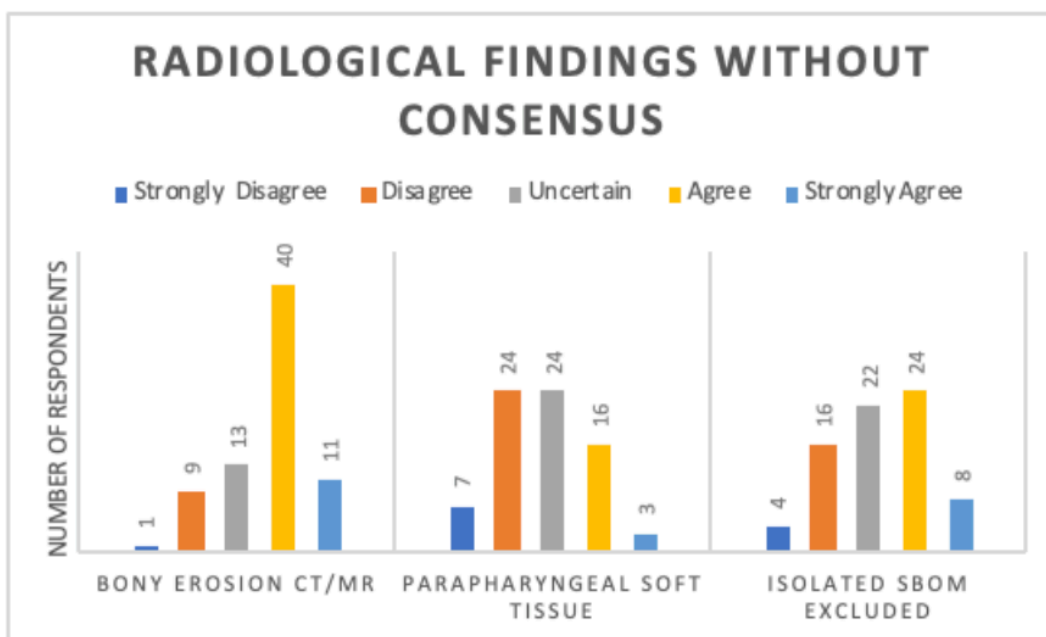

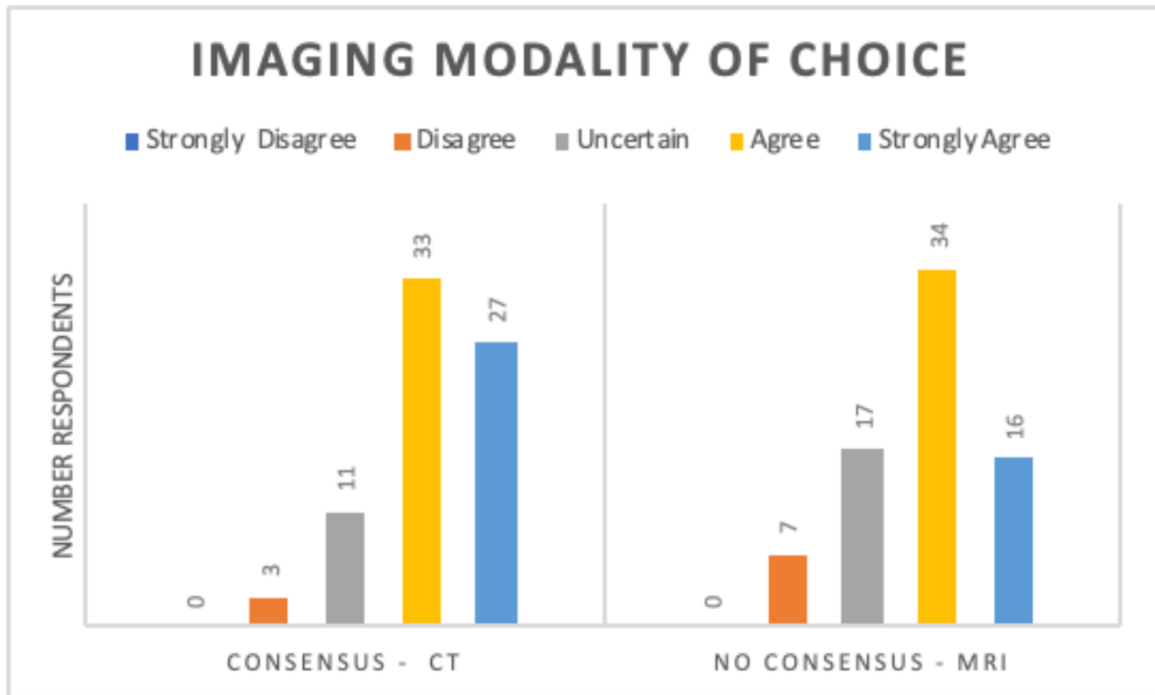

4a. INVESTIGATION: A case of PROBABLE NOE will have the following findings on histolog

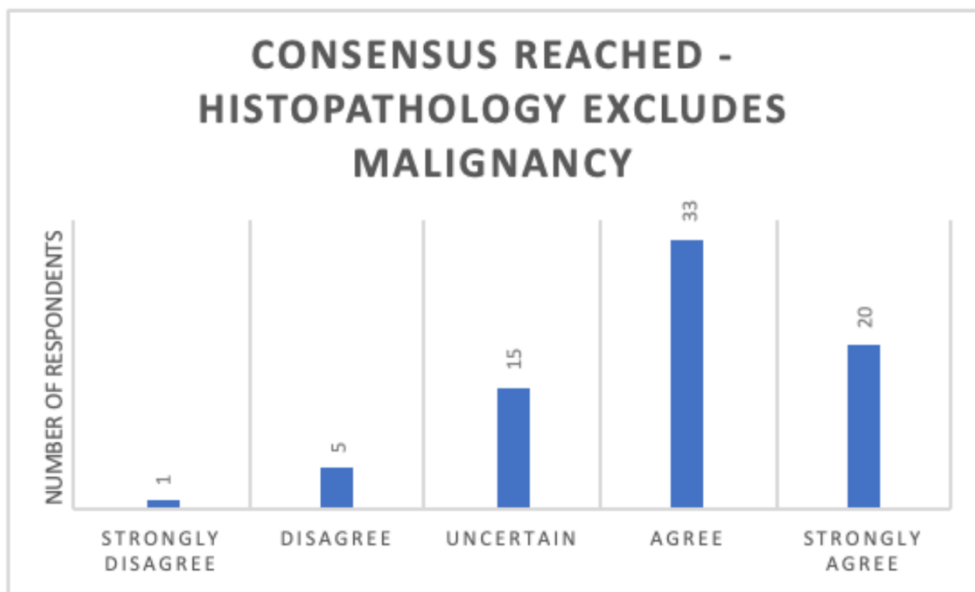

4b. INVESTIGATION: A case of PROBABLE NOE will have the following biochemistry/haematology findings: \*

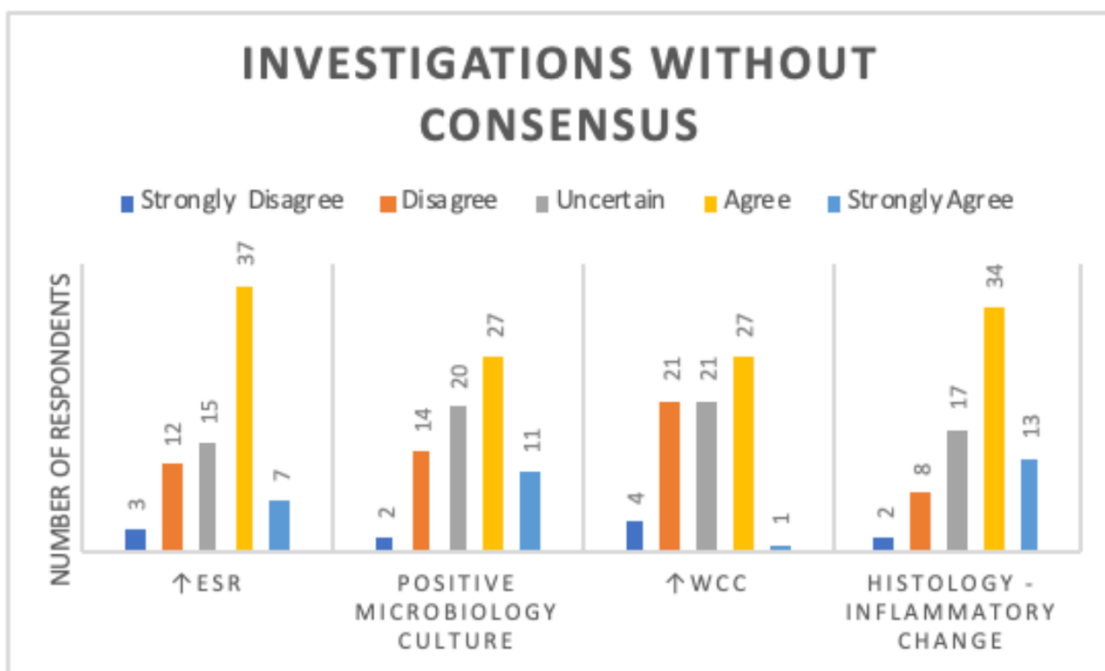

5. Regarding risk factors for PROBABLE NOE: \*

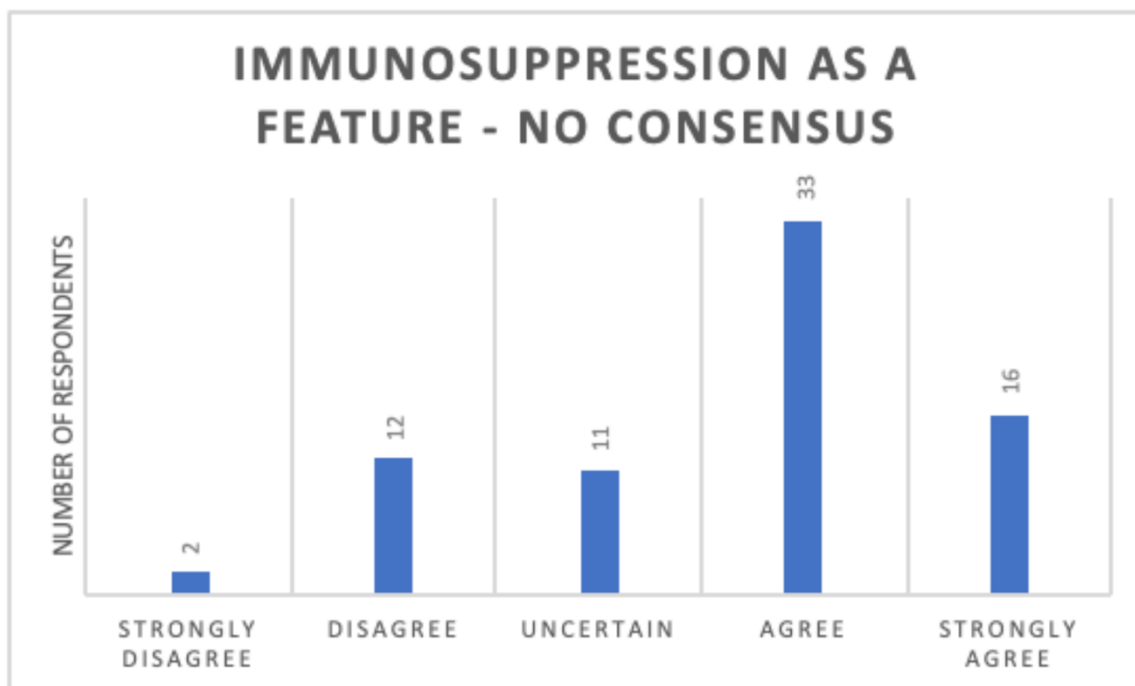

1. Which of the following features present in a definite case of NOE would meet criteria for severe disease? \*

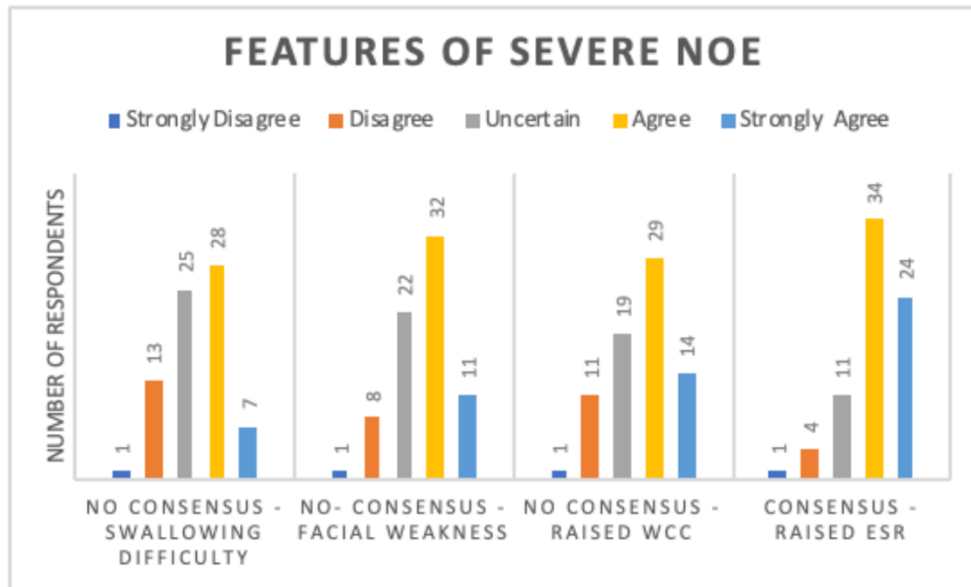

For peer review only

Part 4:  
Diagnosis  
of  
RELAPSED  
NOE

In order to better understand treatment failure, we need to understand what constitutes a true relapsed case. This should be differentiated from 'a case with progressive disease'. A relapsed case is a case where the patient has responded to treatment and the treatment course has been completed.

The following questions will try to ascertain what should define a relapsed case of Necrotising Otitis Externa

1. The following SYMPTOMS suggest a relapsed case: \*

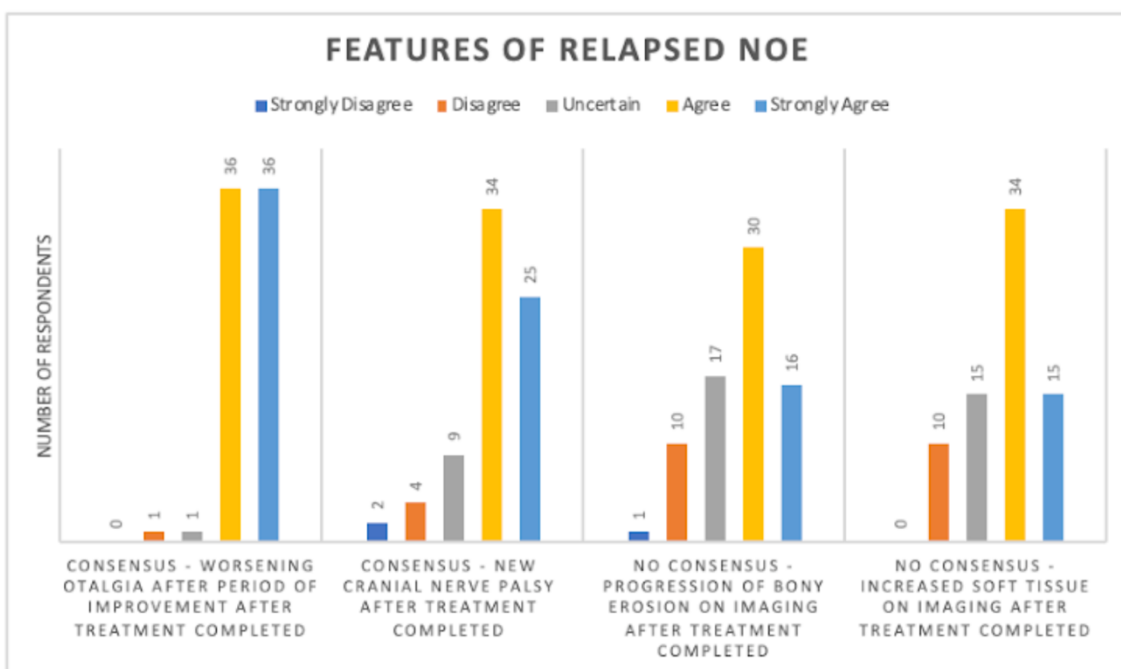

3. Regarding imaging: \*

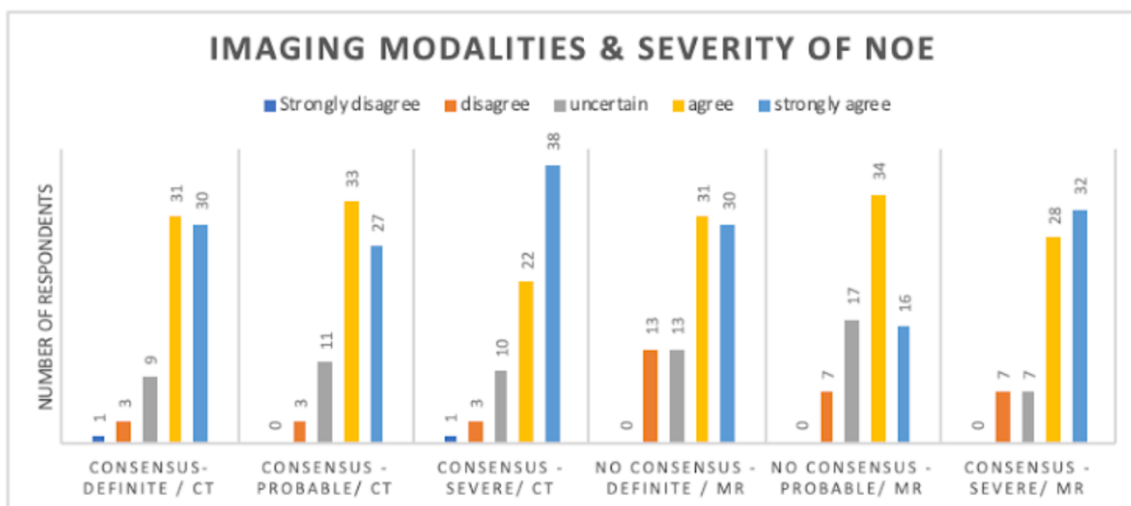

# Diagnostic Criteria for Necrotising Otitis Externa: Setting The Foundations

Thank you for your participation in Round 1. Respondents from Round 1 will be invited to take part in Round 2. Please use the same email address used in Round 1, to which this second round survey has been sent.

For Round 2 we have analysed the results of Round 1 in accordance with commonly accepted criteria[1], and incorporated your comments to design a set of questions which we hope will bring us closer to achieving consensus for a case definition for definite NOE. Relevant results from Round 1 are presented prior to the corresponding questions below; you may find the charts helpful when responding to these second round questions.

In addition, we aim to define: probable NOE, severe NOE, relapsed NOE and non-responding NOE

The case definition of NOE should include every true case of NOE and exclude every case that may have some features of, but is not truly NOE.

We have included one question on indications for imaging as this is a likely to be key variable in classifying cases.

At the end of the survey we have given you the opportunity to add any questions that you think should have been included or to make any general comments.

We aim to publish this Delphi process and the conclusions of this process. Everyone who completes both Round 1 and 2 will be credited as a collaborator.

[1]. Diamond IR, Grant RC, Feldman BM, Pencharz PB, Ling SC, Moore AM, et al. DeQning consensus: a systematic review recommends methodologic criteria for reporting of Delphi studies. *J Clin Epidemiol.* 2014;67:401–09]

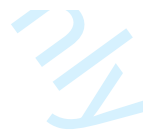

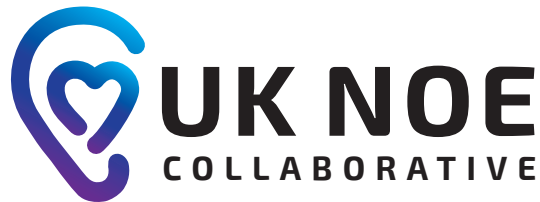

## Outcomes from Delphi Round 2: NOE Case Definition

### DEFINITE CASE

**1a. Symptoms: MAJOR symptoms - necessarily present for all definite cases of NOE:**

| Consensus                                  | No Consensus                                             |
|--------------------------------------------|----------------------------------------------------------|
| <b>Otalgia AND otorrhoea INCLUDE (86%)</b> | Otalgia OR otorrhoea<br>Otalgia alone<br>Otorrhoea alone |

**1b. Symptoms: MINOR symptoms - which MAY be present for all definite cases of NOE:**

| Consensus                         | No consensus                                |
|-----------------------------------|---------------------------------------------|
| <b>Night pain – INCLUDE (81%)</b> | Facial pain<br>Trismus<br>Headache<br>Fever |

**1c. What number of minor symptoms should be present , together with major symptoms, to define a true case:**

- 0 – 35.7%
- 1 – 25.7%
- 2 – 22.9%
- 3 – 14.3%
- 4 – 1.4%

**2. A true case of DEFINITE NOE will have the following clinical signs:**

| Consensus                                               | No consensus                            |
|---------------------------------------------------------|-----------------------------------------|
| <b>EAC granulation AND inflammation – INCLUDE (80%)</b> | Inflammation alone<br>Granulation alone |
| <b>EAC granulation OR inflammation – INCLUDE (79%)</b>  |                                         |
| <b>No signs – EXCLUDE – 89%</b>                         |                                         |

**3. A true case of DEFINITE NOE will have the following findings on imaging:**

| Consensus                                                                                                                                                                                                                            | No consensus                                                                     |
|--------------------------------------------------------------------------------------------------------------------------------------------------------------------------------------------------------------------------------------|----------------------------------------------------------------------------------|
| <b>Bone erosion EAC CT - INCLUDE (87%)</b><br><b>Soft tissue EAC CT - INCLUDE (81%)</b><br><b>Bone erosion AND soft tis EAC - INCLUDE (79%)</b><br><b>CT soft tis - T1 MR - INCLUDE (81%)</b><br><b>Normal CT/MR - EXCLUDE (87%)</b> | Bone erosion OR soft tissue<br>Isolated SBOM from source other than EAC excluded |

**4a. INVESTIGATION: A true case of DEFINITE NOE will have the following findings on histology:**

| Consensus                                                                                                                                                            | No consensus                                                          |
|----------------------------------------------------------------------------------------------------------------------------------------------------------------------|-----------------------------------------------------------------------|
| <b>Malignancy excluded - INCLUDE (87%)</b><br><b>Inflammation confirmed - INCLUDE (83%)</b><br><b>Malignancy excluded AND inflammation confirmed - INCLUDE (93%)</b> | Excludes malignancy or confirms inflammation<br><br>Histo always sent |

**4b. INVESTIGATION: A true case of DEFINITE NOE will have the following biochemistry/haematology findings:**

| Consensus | No consensus             |
|-----------|--------------------------|
|           | Raised CRP<br>Raised ESR |

**5. Regarding risk factors for DEFINITE NOE: NO CONSENSUS** The patient will be always frail or immunosuppressed (diabetic, steroid therapy, malignancy, biologic therapy, HIV infected etc.)

**COMMENTS**

- CT alone may lag behind actual bony destruction
- Changes in time are also useful in confirming or refuting definite NOE - e.g. Improvement with treatment on serial imaging
- As a radiologist who has seen many cases of NOE, I believe that even streakiness to the parapharyngeal fat in the appropriate clinical context is sufficient to diagnose NOE and we have had many cases treated as such
- There may be no signs in the ear and the patient has got skull base Osteomyelitis, if the patient had been treated before hand but not adequately.
- minor criteria don't necessarily need to be present, but might be helpful in the absence of definite radiological features eg no bone erosion but soft tissue swelling present, having multiple minor criteria present +/- immunosuppression could be sufficient for a definite diagnosis.
- Certain criteria together make it a DEFINITE NOE. For example a facial palsy AND granulation tissue (even without evidence of bony erosion on CT). We should incorporate that somehow ideally.
- T1 enhanced imaging is an important modality in the diagnosis of NOE



- 1 • Granulation tissue is inflammatory tissue, it is formed in response to  
2 inflammation, I don't see how one can have granulation tissue without  
3 inflammation in the canal.
- 4 • Regarding immunosuppression, advancing age is an important risk factor in  
5 itself without necessarily implying frailty.  
6  
7  
8  
9  
10  
11  
12  
13  
14  
15  
16  
17  
18  
19  
20  
21  
22  
23  
24  
25  
26  
27  
28  
29  
30  
31  
32  
33  
34  
35  
36  
37  
38  
39  
40  
41  
42  
43  
44  
45  
46  
47  
48  
49  
50  
51  
52  
53  
54  
55  
56  
57  
58  
59  
60

For peer review only

## PROBABLE CASE

### 1a. Symptoms: MAJOR symptoms - necessarily present for all probable cases of NOE:

| Consensus                           | No Consensus                                             |
|-------------------------------------|----------------------------------------------------------|
| Otalgia AND otorrhoea INCLUDE (81%) | Otalgia OR otorrhoea<br>Otalgia alone<br>Otorrhoea alone |

### 1b. Symptoms: MINOR symptoms - which MAY be present for all probable cases of NOE:

| Consensus                  | No consensus                                                   |
|----------------------------|----------------------------------------------------------------|
| Night pain - INCLUDE (71%) | Facial pain<br>Facial weakness<br>Trismus<br>Headache<br>Fever |

### 1c. What number of minor symptoms should be present , together with major symptoms, to define a probable case:

- 0 - 22.9%
- 1 - 32.9%
- 2 - 30%
- 3 - 11.4%
- 4 - 2.9%

### 2. A case of PROBABLE NOE will have the following clinical signs:

| Consensus                                                                   | No consensus                                                                  |
|-----------------------------------------------------------------------------|-------------------------------------------------------------------------------|
| EAC granulation OR inflammation - INCLUDE (81%)<br>No signs - EXCLUDE - 81% | EAC granulation AND inflammation -<br>Inflammation alone<br>Granulation alone |

### 3. A case of PROBABLE NOE will have the following findings on imaging

| Consensus                                                                               | No consensus                  |
|-----------------------------------------------------------------------------------------|-------------------------------|
| Soft tissue swelling of external ear canal will be visible on CT or MRI - INCLUDE - 87% | CT scan excludes bony erosion |

### 4a. INVESTIGATION: A case of PROBABLE NOE will have the following findings on histology

| Consensus                                                             | No consensus                                 |
|-----------------------------------------------------------------------|----------------------------------------------|
| <b>Inflammation confirmed - INCLUDE (86%)</b>                         | Excludes malignancy or confirms inflammation |
| <b>Malignancy excluded AND inflammation confirmed - INCLUDE (80%)</b> | Histo always sent                            |

#### 4b. INVESTIGATION: A case of PROBABLE NOE will have the following biochemistry/haematology findings:

| Consensus                      | No consensus |
|--------------------------------|--------------|
| <b>CRP MAY be raised - 83%</b> | Raised CRP   |
| <b>ESR MAY be raised - 86%</b> | Raised ESR   |

**5. Regarding risk factors for PROBABLE NOE: NO CONSENSUS** The patient will be always frail or immunosuppressed (diabetic, steroid therapy, malignancy, biologic therapy, HIV infected etc.)

#### COMMENTS

- Bony erosion on CT would confirm NOE in the correct setting but a lack of bone erosion does not exclude it. If there are risk factors, marked soft tissue changes and/or persistent clinical concern I would advocate baseline MRI to assess for bone oedema and serial imaging to assess response to treatment. My concerns would be either missing NOE if we image early in the course but also missing malignancy if we box patients into NOE diagnosis.
- Repeated ear trauma (eg in-ear headphone use) is risk factor in immunocompetent/ non-frail individuals, ear syringing and hearing aid use
- Probable NOE in my mind is the group of patients where the clinical symptoms and signs are compatible but the imaging may not be complete ( CT without MRI for example) or unable to tolerate MRI all sequences. They do not need to have an immunosuppression risk factor to meet a case definition.
- I'm not confident that I understand how you will use these answers e.g. Symptoms: MINOR symptoms - which MAY be present for all probable cases of NOE - I don't see how something can be MAY and present in ALL. Also ...A case of PROBABLE NOE will have the following findings on imaging: CT scan excludes bony erosion - you mean WILL -they may because its not perfectly sensitive...?
- the length of duration of symptoms also important
- Also I have disagreed with facial weakness for probably NOE because I think it is more of an indicator of definite NOE!
- Probably diagnosis still shouldn't just be oedema of external canal, should show some evidence of tissue of the external ear and beyond otherwise this is simple otitis externa at that point. Doesn't have to show bone erosion. CRP and ESR May be raised but I don't believe it always has to be, have seen patients with limited raised blood serological marker

#### SEVERE CASE

1. Which of the following features present in a definite case of NOE would meet criteria for severe disease?

| Consensus                                                                                                                                              | No consensus                               |
|--------------------------------------------------------------------------------------------------------------------------------------------------------|--------------------------------------------|
| <b>Cerebral venous thrombosis - INCLUDE - 89%</b><br><b>Lower cranial nerve palsy INCLUDE 99%</b><br><b>Disease spread contralaterally INCLUDE 81%</b> | Elevated Inflammatory markers (ESR or CRP) |

**2. One or a combination of how many of these features in a definite case of NOE should meet criteria for severe disease?**

| Consensus                | No consensus |
|--------------------------|--------------|
| <b>1 - INCLUDE - 70%</b> | >1, >2, >3   |

**3. The following features on MR are suggestive of severe disease (MR as imaging modality reached consensus):**

| Consensus                                                                                                                                                  | No consensus |
|------------------------------------------------------------------------------------------------------------------------------------------------------------|--------------|
| <b>Soft tis/fluid collection below skull base - INCLUDE - 70%</b><br><b>Intracranial involvement - INCLUDE- 91%</b><br><b>Central SBOM - INCLUDE - 88%</b> |              |

**4. The following features on CT are suggestive of severe disease (CT as imaging modality reached consensus):**

| Consensus                                                                                                                                                   | No consensus                 |
|-------------------------------------------------------------------------------------------------------------------------------------------------------------|------------------------------|
| <b>Bone erosion of stylomastoid foramen walls - INCLUDE - 73%</b><br><b>Intracranial involvement - INCLUDE - 93%</b><br><b>Central SBOM - INCLUDE - 91%</b> | Soft tissue below skull base |

**COMMENTS**

- Facial weakness should be included in the list of features
- Are we delineating between NOE and Skull base osteomyelitis? Whilst they ay be part of the same spectrum, they can appear and act as separate diseases.
- Skull base osteomyelitis is a different disease entity to NOE and should be investigated and managed on its own merits.
- Central skull base without obvious clinical history to support an ear cause I believe is a separate entity to NOE, though in the same family per se.
- I would regard any complication (facial nerve involvement, collection, TMJ involvement/septic arthritis, thrombosis, intracranial spread) as severe, or extensive skull base involvement
- would consider broader terms used for bony erosion on CT as may be variable distributions not just around the SMF e.g. EAC alone, TMJ, extension into mastoid and/or petrous apex

- 1 • I would have thought that severe disease we more of a clinical severity rather  
2 than radiological, the neurology and physical impairment being most prominent.
- 3 • I am struggling to know without a radiological grading score which of these  
4 changes on CT or MRI I would classify as severe versus non severe but definite  
5 NOE that is why we need a way of grading the imaging
- 6 • for some of the radiology I would rely on specialised radiologist input  
7

8  
9  
10  
11  
12  
13  
14  
15  
16  
17  
18  
19  
20  
21  
22  
23  
24  
25  
26  
27  
28  
29  
30  
31  
32  
33  
34  
35  
36  
37  
38  
39  
40  
41  
42  
43  
44  
45  
46  
47  
48  
49  
50  
51  
52  
53  
54  
55  
56  
57  
58  
59  
60

For peer review only

## RELAPSED CASE

### 1. The following SYMPTOMS suggest a relapsed case:

| Consensus                                                                                                                                                                                                                                                                                                                                                                                             | No consensus |
|-------------------------------------------------------------------------------------------------------------------------------------------------------------------------------------------------------------------------------------------------------------------------------------------------------------------------------------------------------------------------------------------------------|--------------|
| <p><b>Worsening otalgia after improvement after treatment completed - INCLUDE 96%</b></p> <p><b>Worsening otorrhoea after improvement after treatment completed -INCLUDE 71%</b></p> <p><b>Worsening otalgia AND otorrhoea after improvement after treatment completed -INCLUDE - 77%</b></p> <p><b>Worsening otalgia OR otorrhoea after improvement after treatment completed -INCLUDE - 74%</b></p> |              |

### 2. The following SIGNS suggests a relapsed case

| Consensus                                                                                                                                                                                                                                                                                                                                                                                 | No consensus |
|-------------------------------------------------------------------------------------------------------------------------------------------------------------------------------------------------------------------------------------------------------------------------------------------------------------------------------------------------------------------------------------------|--------------|
| <p><b>Recurrent granulation after resolution and tx completed - INCLUDE - 87%</b></p> <p><b>Recurrent inflammation after resolution and tx completed - INCLUDE - 77%</b></p> <p><b>Recurrent granulation AND inflammation after resolution and tx completed - INCLUDE - 77%</b></p> <p><b>Recurrent granulation OR inflammation after resolution and tx completed - INCLUDE - 74%</b></p> |              |

### 3. The following IMAGING findings suggest a relapsed case

| Consensus                                                                                                                                                                                                              | No consensus |
|------------------------------------------------------------------------------------------------------------------------------------------------------------------------------------------------------------------------|--------------|
| <p><b>Progression bony erosion or bone marrow oedema after improvement - INCLUDE - 93%</b></p> <p><b>Increased soft tissue after improvement - INCLUDE - 89%</b></p> <p><b>No role for imagine - EXCLUDE - 82%</b></p> |              |

### 4. The following INVESTIGATION results suggest a relapsed case:

|                                                           |                                      |
|-----------------------------------------------------------|--------------------------------------|
| Consensus                                                 | No consensus                         |
| Rising ESR after treatment completed - -<br>INCLUDE – 70% | Rising CRP after treatment completed |

**5. Regarding the duration off from treatment prior to diagnosis of relapse (not treatment failure) – NO CONSENSUS: 1 week, 2 weeks, 2 months**

**COMMENTS**

- Variable times commented from 1 week to 3 months based on frequency of imaging
- We find gallium scans are useful for monitoring for treatment response and relapsed disease, or for disease progression. It is the only imaging that gives "real time" data. CT erosive findings are late. MRI oedema takes a long time to resolve. Is there any point in defining the difference between incompletely treated and relapsed disease? if the patient is worsening (at any stage), they need more treatment.
- is there enough evidence to define this between 2 weeks and 2 months post treatment
- unless antibiotic treatment is standardised, the definition for 'relapse' is subject to bias/ Would need ID guidance on the duration of treatment completion to be able to confidently answer Q5
- Any signs or symptoms after treatment cessation has been agreed should constitute a relapse.
- I think relapse is when the patient's condition mainly pain/headache deteriorates after a period of being asymptomatic as patient can still be down graded to oral AB and can get a recurrence of symptoms.
- It is technically a "relapse" of that infection. Better to use the term recurrence of NOE instead of relapse? and then define relapse as return of symptoms/signs at any point after Completion of treatment and recurrence as having to have a minimum gap of one month off treatment?
- I don't think inflammatory markers are reliable markers of active infection but would worry if raised.
- It depends how we define 'cure' or cessation of treatment
- If a patient reaches 2 months post-diagnosis is it another (new) infection?
- increase in time after treatment completed adds to the confidence in the diagnosis of relapse

## NON-RESPONSE TO TREATMENT

---

### 1. Symptoms

| Consensus                                                                                                                                                                   | No consensus |
|-----------------------------------------------------------------------------------------------------------------------------------------------------------------------------|--------------|
| <b>Worsening otalgia on treatment - INCLUDE 91%</b><br><b>Worsening otorrhoea on treatment - INCLUDE 70%</b><br><b>Both - INCLUDE 76%</b><br><b>Either/or - INCLUDE 73%</b> |              |

### 2. Signs

| Consensus                                                                                                                                             | No consensus         |
|-------------------------------------------------------------------------------------------------------------------------------------------------------|----------------------|
| <b>Worsening granulation on treatment - INCLUDE 70%</b><br><b>Worsening inflammation on treatment - INCLUDE 77%</b><br><b>Either or - INCLUDE 71%</b> | Both - IGNORE? - 66% |

### 3. Imaging

| Consensus                                                                                                                                                                                                                                | No consensus          |
|------------------------------------------------------------------------------------------------------------------------------------------------------------------------------------------------------------------------------------------|-----------------------|
| <b>Progression bony erosion whilst on treatment - INCLUDE 77%</b><br><b>Progression bone erosion to other parts skull base except EAC - INCLUDE 84%</b><br><b>Progression bone marrow oedema/enhancement skull base MR - INCLUDE 77%</b> | Increased soft tissue |

### 4. Investigations

| Consensus | No consensus                                                                         |
|-----------|--------------------------------------------------------------------------------------|
|           | Rising CRP on treatment<br>Rising ESR on treatment Exclusion malignancy on histology |

### 5. Duration on treatment prior to diagnosis of non-response:

| Consensus                      | No consensus |
|--------------------------------|--------------|
| <b>Min 3/7 - EXCLUDE - 79%</b> | 5            |
|                                | 7            |
|                                | 10           |
|                                | 14           |



## IMAGING

### Imaging in Otitis Externa

| Consensus                                                                                                                                                                                                                                                                             | No consensus                                                                                                                                                                         |
|---------------------------------------------------------------------------------------------------------------------------------------------------------------------------------------------------------------------------------------------------------------------------------------|--------------------------------------------------------------------------------------------------------------------------------------------------------------------------------------|
| <b>No role in severe/persistent - EXCLUDE - 87%</b><br><b>Imaging in severe/persistent when abx failed - INCLUDE 80%</b><br><b>Severe pain INCLUDE - 74%</b><br><b>Night pain INCLUDE - 74%</b><br><b>Lower CN palsies INCLUDE - 100%</b><br><b>Immunosuppression - include - 76%</b> | Imaging is only indicated in severe/persistent OE where there has been failure of antibiotic therapy AND risk factors* (diabetes, Immunocompromise etc) for NOE are present<br>Polyp |

### Imaging in NOE

| Consensus                                     | No consensus                                                                                                                                                                                                                                                                          |
|-----------------------------------------------|---------------------------------------------------------------------------------------------------------------------------------------------------------------------------------------------------------------------------------------------------------------------------------------|
| <b>CT 1<sup>st</sup> line - INCLUDE - 87%</b> | MR 1 <sup>st</sup> line<br>If CT shows swelling of external auditory canal but no bone erosion then MRI should be performed<br>If CT shows no swelling of external auditory canal or bone erosion then MRI should be performed<br>PET-CT should be performed if CT and MRI are normal |

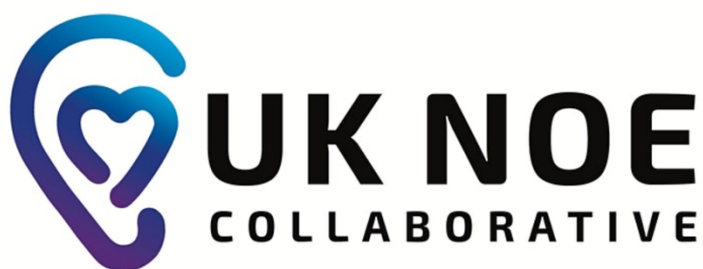NOV  
21**UK NOE Collaborative Inaugural Meeting & Case Definition Workshop**

by UK NOE Collaborative

[Follow](#)

Free

**Description**

We would greatly appreciate your presence at the UK NOE Collaborative Inaugural Meeting. A key aim of this meeting will be to agree a case definition for NOE. It is hoped this definition will be endorsed by ENT UK and the British Infection Association and used in subsequent work in the UK.

Prior to the meeting, outputs from the online Delphi process will be circulated for review.

The venue (in central Oxford) will be confirmed and details circulated once number of attendees are known. We would therefore be grateful if you could confirm attendance asap.

**Provisional Programme:**

1200 - 1300: Lunch

1300 - 1400: Introduction to Collaborative &amp; Future Plans

1400 - 1500: Case Definition Workshop 1

1500 - 1530: Tea &amp; Coffee

1530 - 1630: Case Definition Workshop 2

1630 - 1700: Closing Remarks

**Date and time**

Thu, 21 November 2019

12:00 - 17:00 GMT

[Add to calendar](#)**Location**

Oxford. Venue TBC.

Oxford

[View Map](#)

w only

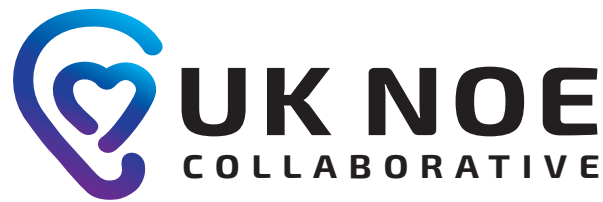

The first UK NOE Collaborative meeting took place on the 21<sup>st</sup> November 2019 at St. Peter's College, Oxford.

The aim of the meeting was to discuss the UK NOE Collaborative Delphi process to date and to carry out a third round of the Delphi survey, continuing work on the definition for definite, probable, relapse, severe cases and agreeing indications for imaging.

### **Presentations**

The programme started with an informative presentation by Professor Martin McNally, Head of Limb Reconstruction, Oxford. He presented two previous Delphi processes for case definition development with which he had been involved: fracture related infections and prosthetic joint infections. Both of these processes involved groups of international collaborators and required an extended, iterative process to resolve. The notable difference for these conditions compared to NOE, was the existence of published data to inform the process. Whilst the challenges of the method were undeniable, the benefit of being able to agree guidelines and plan studies based on widely agreed definitions was evident.

Dr Pieter Pretorius, Consultant Neuroradiologist, Oxford provided clear succinct insights into the advantages and disadvantages of different scanning modalities and illustrated the difficulties of making a radiological diagnosis of NOE. A discussion followed on what modality should be used to follow cases and diagnose relapsed cases. MRI and CT are widely used, however the usefulness of other modalities including gallium scans and PET scans have yet to be shown.

Ms Maha Khan, ENT Specialist Registrar, Manchester presented an overview of the principles of the Delphi process, the rationale for the questions used to date in the NOE Delphi process and results from Round 2.

Dr Susanne Hodgson, Academic Clinical Lecturer in Infection, Oxford presented the proposed NITCAR prospective study protocol. The discussion focussed on whether definite cases or definite and possible cases of NOE should be included in the study design. The choice between a thorough research study and a more limited national service evaluation was also reviewed and the group were in favour of a definitive study. Discussions are ongoing with INTEGRATE and it is hoped that this study will prove to be a successful collaborative effort between the two groups.

## Delphi Process Discussion

The discussion of case definitions was the main focus for the day. This session was facilitated by Professor McNally and Ms Emma Stapleton, ENT Consultant, Manchester. During the first half of the session the discussion was left open to allow attendees to discuss a range of the different aspects of NOE. The second half of the discussion was more focussed, in order to address items from Round 2 of the Delphi Process which had not yet reached consensus.

It was agreed that the term 'malignant otitis externa' should not be used. It was pointed out that the term 'necrotising otitis externa' is not accurate due to the absence of true necrosis. This point was discussed and it was agreed that although a misnomer, there was no support for a proposal to rename the condition.

The chronology of symptoms was raised and it was agreed that whilst otalgia and otorrhoea had met consensus as essential features for a clinical diagnosis of NOE, the otorrhoea may have subsided by the time a diagnosis of NOE was made. It was therefore agreed that clinical diagnosis of NOE requires the inclusion of the phrase 'or a history of recent otorrhoea'. The group agreed that adding minimum durations of symptoms/signs prior to imaging or escalation of treatment would be important in defining an investigative algorithm. Professor McNally's past experience advised against pursuing the suggestion of a scoring system for predicting the likelihood of a case from a constellation of findings.

There was discussion about the meaning of the term 'probable NOE'. Professor McNally supported the concept of having a term to define those cases which may not fulfil all the criteria for a definite case. It was agreed that the term 'possible NOE' might be a more appropriate term to define these cases.

It was agreed that CT is the initial imaging modality of choice, and if normal in the presence of a clinical suspicion of NOE, it would be reasonable to proceed to MRI. The need to explore the role of gallium/SPECT/labeled scans was repeatedly raised and agreed that data is needed to inform the role of each of these modalities.

It was agreed that non-response is defined as no reduction in symptoms after two weeks of effective therapy; relapse involves worsening of symptoms or signs following a period of improvement, and a list of features indicating severe NOE had previously met consensus. Relapse, non response and severe infection were difficult to clearly define and for future clarity, will benefit from wider consultation addressing specific questions around timing of diagnosis, role of histology/laboratory markers and imaging modality. It was acknowledged that there is little data to support these definitions other than expert opinion, and that there should be a careful review once the evidence becomes available.

INTEGRATE are currently undertaking a Delphi process to establish a case definition for otitis externa. It was acknowledged that this process, once completed should link to and inform the Delphi process for NOE so that the definitions from these two processes will reflect the continuum of disease.

1  
2  
3  
4 It was agreed that a definite case of NOE has a history of otalgia and otorrhoea with  
5 evidence of unequivocal bone erosion on CT. It was agreed that this condition is most  
6 likely in an elderly frail, diabetic or otherwise immunocompromised person.  
7 It was agreed that a MDT approach including ENT, radiology and infection specialists  
8 should be promoted.  
9

### 10 **Conclusion**

11 The aims for the day were ambitious and although clear definitions of all conditions  
12 were not agreed, important progress was made. Consensus definitions were reviewed  
13 and supported and the direction of the next round of the Delphi process was agreed.  
14 Important decisions were made regarding design of the planned, national prospective  
15 study. Perhaps most importantly, the network was strengthened with great enthusiasm  
16 and clear commitment to support future work.  
17  
18  
19

### 20 **Next steps**

21 The definitions agreed at this meeting will be circulated in another round in the Delphi  
22 process to the UK NOE Collaborative email group. Once consensus is reached, the agreed  
23 definitions will be circulated more widely through the supporting organisations  
24 including BIA, BSO, ENT UK and BSAC for wider consultation before these are finally  
25 agreed. Members will be invited to participate as contributing sites in the planned  
26 prospective national study of the epidemiology, risk factors, management and  
27 outcomes.  
28  
29  
30  
31  
32

33 Monique Andersson  
34 On behalf of UK NOE Collaborative  
35  
36  
37  
38  
39  
40  
41  
42  
43  
44  
45  
46  
47  
48  
49  
50  
51  
52  
53  
54  
55  
56  
57  
58  
59  
60

# Delphi Round 4

Dear Colleagues,

Thank you for your contribution to this NOE Delphi process. We apologise for the major delay in the process, which was somewhat unavoidable. We are now entering Round 4, having had two electronic rounds of questions and one face to face meeting.

In this current round there is only one section, with a total of 5 questions with opportunity for comment. There may appear to be repetition from previous rounds. This is to ensure that we have consensus. Should consensus be reached on all definitions the next step will be that the agreed definitions will be circulated to a wider group including all the organisation stakeholders including BSO, ENT UK, BIA and BSAC for consideration and comment. If there are other organisations who you think should be involved please let us know. If we do not reach consensus we will need to engage in another round of questions.

We have used a number of terms in the definitions that themselves need defining. As was discussed at the Oxford meeting knowing how we are using certain words is critical to agreeing or disagreeing with the proposed definitions. *Please be aware of these definitions as you reply to the questionnaire. They can be viewed here or by following the link at the top of each page.*

Thank you again for your contribution.

Kind regards,

Monique Andersson, Consultant in Infection Oxford

Martin Williams, Consultant in Infection Bristol

Pablo Martinez-Devesa, Consultant ENT Surgeon Oxford

Emma Stapleton, Consultant ENT Surgeon Manchester

Pieter Pretorius, Consultant Neuroradiologist Oxford

## **DEFINITIONS**

It was clear from Round 3 that having a clear understanding of terms used in definition is important. Please find below the key definitions used in this document.

**Otorrhoea** – discharge from the EAC. This may be a symptom or a sign.

**Otalgia** – pain originating in the ear.

Note a patient may not always complain of pain (eg. in severe dementia) but there are signs suggestive of severe pain (eg. irritability, groaning, holding ear and others). It is acknowledged that in very rare cases eg. in diabetics with severe neuropathy this symptom may be absent.

**Granulation tissue** - specialised tissue that is formed during the process of healing. It comprises a proliferation of fibroblasts and vascular endothelial cells (angiogenesis), which impart a soft, granular, reddish appearance to the wound and hence the term "granulation". Histologically, it is seen as a proliferation of small capillaries set in oedematous, loose fibroblastic stroma that contains a variable number of acute and/or chronic inflammatory cells.

**Inflammation in EAC** – presence of erythema and oedema in the EAC.

**CT** – Non-contrast enhanced, high-resolution acquisition with 1 or less mm slice thickness bone and soft tissue algorithm reconstructions. If intracranial complications are suspected and MRI not available, contrast enhanced CT can be performed.

**MRI**- High resolution axial and coronal T1 weighted images as well as T2 and/or STIR images + DWI. This can be performed without gadolinium but a gadolinium enhanced scan with fat-saturated post-gadolinium T1-weighted images should be considered in patients with an eGFR > 30, particularly if intracranial complications are suspected or if the differential diagnosis includes malignancy.

**Possible NOE** – this is a diagnosis made on presenting clinical features and is an indication to proceed to imaging to enable a definite diagnosis of NOE. This definition answers the question; ‘who should progress to initial imaging?’

**Severe NOE** – the reason for defining this as a separate entity is because it may impact duration of therapy and there may be indication for deep sampling or operative intervention. Unless it is defined we will not know how to manage it or whether it needs to be managed differently to NOE which is not considered severe.

**Histology** – sampling of the external ear canal, showing features of inflammation. The key outcome of investigation is to exclude malignancy and other differential diagnoses eg. cholesteatoma, keratosis obturans, langerhans cell histiocytosis.

**Immunocompromise** – this refers to any state which may compromise an individual's immune system. It may be the result of frailty/HIV/malignancy/ diabetes/biological drug therapy/others.

1  
2  
3  
4 **Frailty** – a condition or syndrome which results from a multi-system reduction in  
5 reserve capacity to the extent that a number of physiological systems are close to, or  
6 past, the threshold of symptomatic clinical failure. As a consequence the frail person is  
7 at increased risk of disability and death from minor external stresses<sup>1</sup>  
8  
9

10 **Optimisation of immune state** – where possible interventions should be put in place  
11 to improve immune function eg. improving diabetic control, reducing/stopping  
12 immunosuppression, improving compliance with ARVs.  
13  
14  
15  
16  
17  
18  
19  
20  
21  
22  
23  
24  
25  
26  
27  
28  
29  
30  
31  
32  
33  
34  
35  
36  
37  
38  
39  
40  
41  
42  
43  
44  
45  
46  
47  
48  
49  
50  
51  
52  
53  
54  
55  
56  
57

---

58  
59 <sup>1</sup> [https://www.bgs.org.uk/sites/default/files/content/resources/files/2018-05-23/fff\\_full.pdf](https://www.bgs.org.uk/sites/default/files/content/resources/files/2018-05-23/fff_full.pdf)  
60



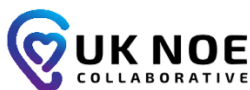

**DELPHI ROUND 4 – RESULTS**  
**NOVEMBER 2020**  
**Response Rate: 76% (61/80)**

Specialty

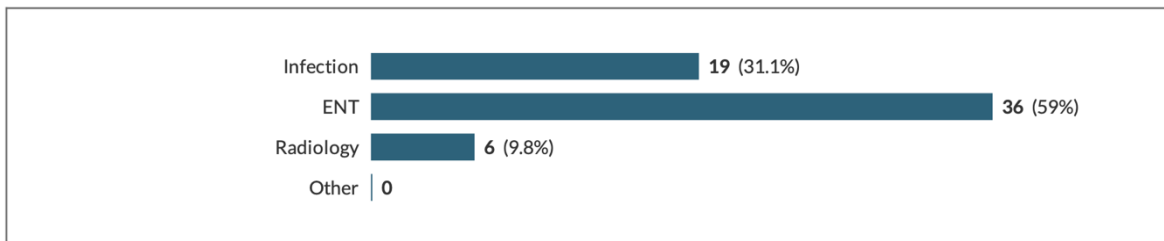

Grade

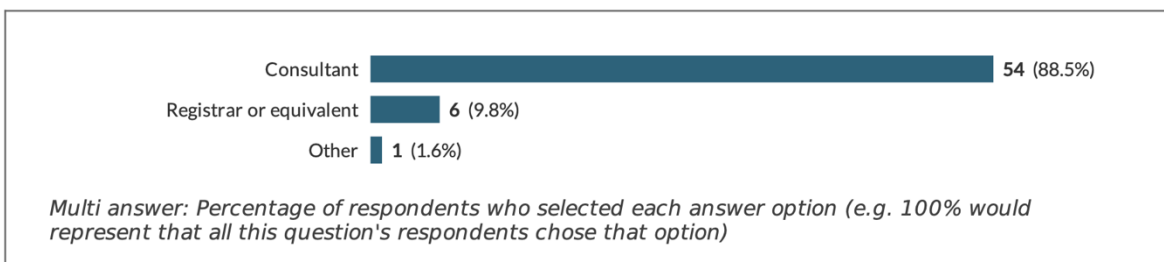

If you selected Other, please specify:

| Showing 1 response                |                        |
|-----------------------------------|------------------------|
| Senior Otology and Implant Fellow | 662153-662144-67468810 |

1  
2  
3  
4 The following definitions have already received  
5  
6 consensus:  
7  
8

9 **I. Defining a true case of Necrotising Otitis Externa (NOE)**  
10

11 NOE is an invasive infection of the external ear canal which has the following  
12 characteristics:  
13

14 - Ootalgia and otorrhoea OR otalgia and a history of otorrhoea  
15  
16

17 AND  
18

19 - Granulation OR inflammation of the external auditory canal  
20  
21

22 AND  
23

24 - CT imaging findings of bony erosion of the external auditory canal, together with soft  
25 tissue inflammation of the external auditory canal  
26  
27

28 AND  
29

30 -is confirmed by exclusion of malignancy on histology  
31  
32  
33  
34  
35  
36  
37  
38  
39  
40  
41  
42  
43  
44  
45  
46  
47  
48  
49  
50  
51  
52  
53  
54  
55  
56  
57  
58  
59  
60

Review only

Comments:

| Showing all 33 responses <a href="#">Show less</a> |                                                                                                                                                                                                                                                                                                                                                |
|----------------------------------------------------|------------------------------------------------------------------------------------------------------------------------------------------------------------------------------------------------------------------------------------------------------------------------------------------------------------------------------------------------|
| 1                                                  | I agree apart from the final one. If there is no granulation tissue, no biopsy will be taken. Generalised swollen ear canal would not be biopsied but would be NOE so I think this needs to at least have a qualifying footnote to say (if granulation tissue/polyp present)                                                                   |
| 2                                                  |                                                                                                                                                                                                                                                                                                                                                |
| 3                                                  |                                                                                                                                                                                                                                                                                                                                                |
| 4                                                  |                                                                                                                                                                                                                                                                                                                                                |
| 5                                                  |                                                                                                                                                                                                                                                                                                                                                |
| 6                                                  | I would say that you don't just have to have bone erosion, you need soft tissue involvement beyond the external auditory canal (TMJ/skull base)                                                                                                                                                                                                |
| 7                                                  |                                                                                                                                                                                                                                                                                                                                                |
| 8                                                  |                                                                                                                                                                                                                                                                                                                                                |
| 9                                                  | Entirely agree                                                                                                                                                                                                                                                                                                                                 |
| 10                                                 |                                                                                                                                                                                                                                                                                                                                                |
| 11                                                 | Agreed                                                                                                                                                                                                                                                                                                                                         |
| 12                                                 |                                                                                                                                                                                                                                                                                                                                                |
| 13                                                 | Should 'a history of otorrhoea' be defined as 'a recent history'? (If so, then we need to define 'recent', but this could be reasonably broad/vague). I think the imaging should be defined as CT or MRI - if the patient happens to have had MRI as first line (without a CT) they shouldn't be excluded from the case definition.            |
| 14                                                 |                                                                                                                                                                                                                                                                                                                                                |
| 15                                                 | 'is confirmed by exclusion of malignancy on histology' in practice is aspirational. Our ENT surgeons very rarely send histology samples                                                                                                                                                                                                        |
| 16                                                 |                                                                                                                                                                                                                                                                                                                                                |
| 17                                                 | Agree                                                                                                                                                                                                                                                                                                                                          |
| 18                                                 |                                                                                                                                                                                                                                                                                                                                                |
| 19                                                 | We have seen a few cases of little or no pain, but with clear bony destruction of EAC bone. We are not certain why these are painless. Diabetic neuropathy has been suggested.                                                                                                                                                                 |
| 20                                                 |                                                                                                                                                                                                                                                                                                                                                |
| 21                                                 | 'confirmed by exclusion of malignancy on histology' although correct in my experience occurs <50% time.                                                                                                                                                                                                                                        |
| 22                                                 |                                                                                                                                                                                                                                                                                                                                                |
| 23                                                 | Not all cases have samples sent for histology. Whilst it is preferable to have malignancy excluded if possible, I don't think this is a requisite for making a diagnosis fo NOE.                                                                                                                                                               |
| 24                                                 |                                                                                                                                                                                                                                                                                                                                                |
| 25                                                 | in our institute 40% CT false negative in early NOE. MRI with contrast far more sensitive and specific                                                                                                                                                                                                                                         |
| 26                                                 |                                                                                                                                                                                                                                                                                                                                                |
| 27                                                 | Agree                                                                                                                                                                                                                                                                                                                                          |
| 28                                                 |                                                                                                                                                                                                                                                                                                                                                |
| 29                                                 | Bony erosion may not be evident on CT in early cases so this needs to be highlighted                                                                                                                                                                                                                                                           |
| 30                                                 |                                                                                                                                                                                                                                                                                                                                                |
| 31                                                 | I think this is good that we have opted for a gold standard definition albeit in practice histology is rarely performed in my experience                                                                                                                                                                                                       |
| 32                                                 |                                                                                                                                                                                                                                                                                                                                                |
| 33                                                 | not all cases can get a biopsy                                                                                                                                                                                                                                                                                                                 |
| 34                                                 |                                                                                                                                                                                                                                                                                                                                                |
| 35                                                 | The last point suggests that ALL patients must be biopsied and also raises the question as to where to biopsy from as the superficial inflammatory appearances may mask a deeper seated neoplasm. I am not sure biopsy is mandatory in all cases?                                                                                              |
| 36                                                 |                                                                                                                                                                                                                                                                                                                                                |
| 37                                                 | Agree with above definition.                                                                                                                                                                                                                                                                                                                   |
| 38                                                 |                                                                                                                                                                                                                                                                                                                                                |
| 39                                                 | Agree                                                                                                                                                                                                                                                                                                                                          |
| 40                                                 |                                                                                                                                                                                                                                                                                                                                                |
| 41                                                 | Agree                                                                                                                                                                                                                                                                                                                                          |
| 42                                                 |                                                                                                                                                                                                                                                                                                                                                |
| 43                                                 | Imaging - if CT normal but MR shows inflammation of marrow I would still deem that to be a true case.                                                                                                                                                                                                                                          |
| 44                                                 |                                                                                                                                                                                                                                                                                                                                                |
| 45                                                 | Does a biopsy HAVE to be done to call it a true case. If so I am going to struggle to include the majority of our cases!                                                                                                                                                                                                                       |
| 46                                                 |                                                                                                                                                                                                                                                                                                                                                |
| 47                                                 | Seems reasonable, but where does this leave the patient with a persistent area of exposed bone in the floor of the external ear canal, but no bone erosion confirmed by CT. Can we say 'ideally CT imaging findings of bony erosion'?                                                                                                          |
| 48                                                 |                                                                                                                                                                                                                                                                                                                                                |
| 49                                                 | Severe intractable pain not responding to topical treatment, not just otalgia, is a key symptom. Sometimes there is just soft tissue involvement on MRI without bony erosion on CT. it may be better to make this AND/OR. The presence of diabetes or immunocompromisr is not pathognomic but if present certainly makes NOE much more likely. |
| 50                                                 |                                                                                                                                                                                                                                                                                                                                                |
| 51                                                 | We have a problem of cases where the patient presents with complications of NOE eg. cranial nerve palsy but does not have bony erosion of the temporal bone. How should these cases be classified?                                                                                                                                             |
| 52                                                 |                                                                                                                                                                                                                                                                                                                                                |
| 53                                                 | Very reasonable                                                                                                                                                                                                                                                                                                                                |
| 54                                                 |                                                                                                                                                                                                                                                                                                                                                |
| 55                                                 | agreed                                                                                                                                                                                                                                                                                                                                         |
| 56                                                 |                                                                                                                                                                                                                                                                                                                                                |
| 57                                                 | Agree                                                                                                                                                                                                                                                                                                                                          |
| 58                                                 |                                                                                                                                                                                                                                                                                                                                                |
| 59                                                 | Does it have to have bone erosion. What if there is extensive inflammatory soft tissue change and marrow signal change on MR?                                                                                                                                                                                                                  |
| 60                                                 |                                                                                                                                                                                                                                                                                                                                                |
|                                                    | yes                                                                                                                                                                                                                                                                                                                                            |
|                                                    | "true case" or confirmed case?                                                                                                                                                                                                                                                                                                                 |
|                                                    | Patients will often present with a normal ear canal, local infection there having resolved as it spread medially                                                                                                                                                                                                                               |
|                                                    | Tissue biopsy for histology is not commonly done in my centre, rather only done if poor response to antibiotic or relapse. It isn't always easy to do a biopsy.                                                                                                                                                                                |
|                                                    | Agree, but CT finding can be subtle in terms of bone erosion, in which case if clinically NOE, treat as such if CT equivocal / soft tissue only                                                                                                                                                                                                |

## II. Defining a case of severe NOE

A case of NOE may be classified as 'severe' if any of the following are present;

- Facial nerve palsy or other lower cranial nerve palsy
- Cerebral venous thrombosis seen on MRI or contrast enhanced CT
- Extensive bone involvement as demonstrated by any of the following;
  - CT showing bone erosion in other skull base locations in addition to the external ear canal wall, e.g: around stylomastoid foramen, clivus, petrous apex.
  - MRI showing bone marrow oedema extending to central skull-base.
  - CT or MRI showing extensive soft tissue phlegmon below the skull base.
- Intracranial spread of the disease (dural thickening, extradural or subdural empyema, cerebral/cerebellar abscess)

Peer review only

Comments:

| Showing all 25 responses <a href="#">Show less</a> |                                                                                                                                                                                                                                                                                                                                                                                                                                                         |
|----------------------------------------------------|---------------------------------------------------------------------------------------------------------------------------------------------------------------------------------------------------------------------------------------------------------------------------------------------------------------------------------------------------------------------------------------------------------------------------------------------------------|
| 1                                                  |                                                                                                                                                                                                                                                                                                                                                                                                                                                         |
| 2                                                  |                                                                                                                                                                                                                                                                                                                                                                                                                                                         |
| 3                                                  |                                                                                                                                                                                                                                                                                                                                                                                                                                                         |
| 4                                                  |                                                                                                                                                                                                                                                                                                                                                                                                                                                         |
| 5                                                  |                                                                                                                                                                                                                                                                                                                                                                                                                                                         |
| 6                                                  |                                                                                                                                                                                                                                                                                                                                                                                                                                                         |
| 7                                                  | agree                                                                                                                                                                                                                                                                                                                                                                                                                                                   |
| 8                                                  |                                                                                                                                                                                                                                                                                                                                                                                                                                                         |
| 9                                                  | Entirely agree                                                                                                                                                                                                                                                                                                                                                                                                                                          |
| 10                                                 |                                                                                                                                                                                                                                                                                                                                                                                                                                                         |
| 11                                                 | Agreed                                                                                                                                                                                                                                                                                                                                                                                                                                                  |
| 12                                                 |                                                                                                                                                                                                                                                                                                                                                                                                                                                         |
| 13                                                 | I agree with these as severe local/anatomical features.                                                                                                                                                                                                                                                                                                                                                                                                 |
| 14                                                 | I am not certain, but wanted to raise whether any systemic features should be considered (new onset delirium, renal impairment etc, without another cause). On balance, these are probably 'complex' rather than 'severe' disease, and therefore are reasonably left out?                                                                                                                                                                               |
| 15                                                 |                                                                                                                                                                                                                                                                                                                                                                                                                                                         |
| 16                                                 |                                                                                                                                                                                                                                                                                                                                                                                                                                                         |
| 17                                                 |                                                                                                                                                                                                                                                                                                                                                                                                                                                         |
| 18                                                 | happy with this                                                                                                                                                                                                                                                                                                                                                                                                                                         |
| 19                                                 |                                                                                                                                                                                                                                                                                                                                                                                                                                                         |
| 20                                                 | Something about unresponsive cases (culture -ve cases) would be helpful here                                                                                                                                                                                                                                                                                                                                                                            |
| 21                                                 |                                                                                                                                                                                                                                                                                                                                                                                                                                                         |
| 22                                                 | Agree                                                                                                                                                                                                                                                                                                                                                                                                                                                   |
| 23                                                 |                                                                                                                                                                                                                                                                                                                                                                                                                                                         |
| 24                                                 | Agree                                                                                                                                                                                                                                                                                                                                                                                                                                                   |
| 25                                                 |                                                                                                                                                                                                                                                                                                                                                                                                                                                         |
| 26                                                 | Happy with this                                                                                                                                                                                                                                                                                                                                                                                                                                         |
| 27                                                 |                                                                                                                                                                                                                                                                                                                                                                                                                                                         |
| 28                                                 | Agree                                                                                                                                                                                                                                                                                                                                                                                                                                                   |
| 29                                                 |                                                                                                                                                                                                                                                                                                                                                                                                                                                         |
| 30                                                 | about right                                                                                                                                                                                                                                                                                                                                                                                                                                             |
| 31                                                 |                                                                                                                                                                                                                                                                                                                                                                                                                                                         |
| 32                                                 | Agreed                                                                                                                                                                                                                                                                                                                                                                                                                                                  |
| 33                                                 |                                                                                                                                                                                                                                                                                                                                                                                                                                                         |
| 34                                                 | Agree with above definition.                                                                                                                                                                                                                                                                                                                                                                                                                            |
| 35                                                 |                                                                                                                                                                                                                                                                                                                                                                                                                                                         |
| 36                                                 | Agree                                                                                                                                                                                                                                                                                                                                                                                                                                                   |
| 37                                                 |                                                                                                                                                                                                                                                                                                                                                                                                                                                         |
| 38                                                 | What about to TMJ - seen several cases of this                                                                                                                                                                                                                                                                                                                                                                                                          |
| 39                                                 |                                                                                                                                                                                                                                                                                                                                                                                                                                                         |
| 40                                                 | Agreed                                                                                                                                                                                                                                                                                                                                                                                                                                                  |
| 41                                                 |                                                                                                                                                                                                                                                                                                                                                                                                                                                         |
| 42                                                 | It isn't just erosion of bone marrow. I would just say bone and leave out the marrow. It's inflammation that is seen on the MRI and not necessarily oedema. Not sure I like the term phlegmon. It's a bit 18th century. Perhaps better to say extensive soft tissue involvement of the skull base. Other complications such as Gradenigo's would also be classified as severe. Similarly one occasionally sees abscess formation within the skull base. |
| 43                                                 |                                                                                                                                                                                                                                                                                                                                                                                                                                                         |
| 44                                                 |                                                                                                                                                                                                                                                                                                                                                                                                                                                         |
| 45                                                 | as per the comment above - only a definite cases of NOE can have severe NOE                                                                                                                                                                                                                                                                                                                                                                             |
| 46                                                 |                                                                                                                                                                                                                                                                                                                                                                                                                                                         |
| 47                                                 | Instead of 'severe NOE' perhaps it should be call 'complicated NOE' people use the term 'Severe' to describe anything that is painful. A change in nomenclature will prevent clinicians using the term 'severe' as descriptor of symptoms, when in NOE (as is currently proposed) it is used as a descriptor clinical and radiological signs                                                                                                            |
| 48                                                 |                                                                                                                                                                                                                                                                                                                                                                                                                                                         |
| 49                                                 |                                                                                                                                                                                                                                                                                                                                                                                                                                                         |
| 50                                                 | agreed                                                                                                                                                                                                                                                                                                                                                                                                                                                  |
| 51                                                 |                                                                                                                                                                                                                                                                                                                                                                                                                                                         |
| 52                                                 | Agree                                                                                                                                                                                                                                                                                                                                                                                                                                                   |
| 53                                                 |                                                                                                                                                                                                                                                                                                                                                                                                                                                         |
| 54                                                 | yes                                                                                                                                                                                                                                                                                                                                                                                                                                                     |
| 55                                                 |                                                                                                                                                                                                                                                                                                                                                                                                                                                         |
| 56                                                 | fair enough                                                                                                                                                                                                                                                                                                                                                                                                                                             |
| 57                                                 |                                                                                                                                                                                                                                                                                                                                                                                                                                                         |
| 58                                                 | Agree!                                                                                                                                                                                                                                                                                                                                                                                                                                                  |
| 59                                                 |                                                                                                                                                                                                                                                                                                                                                                                                                                                         |
| 60                                                 | agree                                                                                                                                                                                                                                                                                                                                                                                                                                                   |

### III. CT scan is the first choice of imaging modality for a suspected case of NOE

Comments:

| Showing all 26 responses <a href="#">Show less</a>                                                                                                                                                              |
|-----------------------------------------------------------------------------------------------------------------------------------------------------------------------------------------------------------------|
| happy with this but feel that MRI should be completed as it picks up the odd cases (recently had an inflammatory condition and have exclude malignancy). plus I also feel it is more useful for follow up.      |
| Entirely agree                                                                                                                                                                                                  |
| yes                                                                                                                                                                                                             |
| yes                                                                                                                                                                                                             |
| happy with this                                                                                                                                                                                                 |
| Agree                                                                                                                                                                                                           |
| Agree                                                                                                                                                                                                           |
| Agree                                                                                                                                                                                                           |
| No if I had a choice it would be post contrast MRI but this is not always possible due to availability (rare today) metal foreign bodies, implants and claustrophobia. CT/PET may then need to be considered    |
| This was extensively discussed at the Oxford meeting but if we have agreed from the experienced radiologists that this is the case can we make it more specific ie. a FLAIR SEQUENCE WITH CONTRAST. For example |
| Agreed                                                                                                                                                                                                          |
| Agree with CT as first choice of imaging because not all units have access to MRI.                                                                                                                              |
| Agree                                                                                                                                                                                                           |
| Yes                                                                                                                                                                                                             |
| Yes                                                                                                                                                                                                             |
| Definitely not. It is very important to do both CT and MRI.                                                                                                                                                     |
| I'm becoming less convinced about this as I see more and more cases. CT is the most easily accessible imaging modality but MR is better, both for diagnosis abs as a baseline for monitoring.                   |
| CT is the first choice imaging modality while an MRI is also done at the same time to assess soft tissue involvement                                                                                            |
| Not controversial                                                                                                                                                                                               |
| agreed                                                                                                                                                                                                          |
| Yes                                                                                                                                                                                                             |
| I wouldn't be too didactic, CT and MR are both good tests for NOE, MR is more sensitive to soft tissue and marrow changes.                                                                                      |
| yes                                                                                                                                                                                                             |
| Changes often more obvious on MRI once disease has spread medially - I would not specify modality                                                                                                               |
| Agree                                                                                                                                                                                                           |
| agree                                                                                                                                                                                                           |

#### IV. Defining a case of 'possible'<sup>[1]</sup> NOE

Possible<sup>1</sup> NOE is a severe infection of the external ear canal which has the following characteristics:

Otalgia and otorrhoea OR otalgia and a history of otorrhoea

AND Granulation OR inflammation of the external auditory canal

AND any of the following features

- immunodeficiency
- night pain
- raised inflammatory markers (ESR/CRP) in absence of other plausible cause

failure to respond to >2 weeks of topical anti-infectives and aural care

---

<sup>[1]</sup> See definition section

Review only

## Comments:

| Showing all 28 responses <a href="#">Show less</a>                                                                                                                                                                                                                                                      |
|---------------------------------------------------------------------------------------------------------------------------------------------------------------------------------------------------------------------------------------------------------------------------------------------------------|
| agree                                                                                                                                                                                                                                                                                                   |
| Entirely agree                                                                                                                                                                                                                                                                                          |
| This is a good definition                                                                                                                                                                                                                                                                               |
| yes - is there a need to specify how immunodeficiency is defined? important to make sure this term is regarded broadly enough to include diabetes. Does being very old and frail with co-morbid problems count as being 'immunodeficient'? (for the purposes of this definition, I would say yes).      |
| happy with this                                                                                                                                                                                                                                                                                         |
| failure to respond is divisive as might be used as easy get out clause. Nominally this includes all diabetics with otitis which is quite a big patient group and a definition like this may open the floodgates for referrals.                                                                          |
| agree                                                                                                                                                                                                                                                                                                   |
| This very similar to the Friedmann and Cohen obligatory and possible criteria of definite NOE. I think if the and was changed to or for the last 4 criteria (immunodeficiency, night pain, raised markers and failure to adequate treatment) would be more non-specific. As it stands its very specific |
| Agree                                                                                                                                                                                                                                                                                                   |
| This is a very clinical definition which for possible is appropriate. Are we able to define the population better. Does this ever present like this is under 18 year olds or even in young adults. I feel it may not                                                                                    |
| seems ok                                                                                                                                                                                                                                                                                                |
| An alternative term could be 'severe OE'                                                                                                                                                                                                                                                                |
| Agree with above definition.                                                                                                                                                                                                                                                                            |
| Agree                                                                                                                                                                                                                                                                                                   |
| Agree                                                                                                                                                                                                                                                                                                   |
| So essentially "possible" becomes anyone without imaging and "true" becomes only those ones who get a biopsy? I am not sure this quite works, for us the true would be the top criteria but without mandating it is CT, occasionally might jsut have had MR and often no biopsy.                        |
| Seems reasonable. Do we need a category of 'Probable NOE'?                                                                                                                                                                                                                                              |
| A lot of the criteria for possible NOE are not in the definition of true NOE. That doesn't seem logical (see comments above re: immunosuppression and intractable, non-responding pain)                                                                                                                 |
| is the failure to respond part of the any features? I think it should be definitely in the definition as this moves it from severe OE to possible NOE                                                                                                                                                   |
| Possible is the same as definite according to previous Delphi rounds.                                                                                                                                                                                                                                   |
| NICE definition of Acute Otitis externa is below 3 weeks. Any failure to respond after 3 weeks of treatment should be investigated for NOE                                                                                                                                                              |
| not controversial                                                                                                                                                                                                                                                                                       |
| agreed                                                                                                                                                                                                                                                                                                  |
| ok                                                                                                                                                                                                                                                                                                      |
| What about not responding to appropriate and or repeated courses of oral abx                                                                                                                                                                                                                            |
| fair enough                                                                                                                                                                                                                                                                                             |
| "Immunodeficiency including diabetes mellitus"                                                                                                                                                                                                                                                          |
| agree                                                                                                                                                                                                                                                                                                   |



## V. Defining a NOE case of non-response to therapy

A case of NOE is defined as non-responsive to therapy if:

There is no improvement in otalgia or otorrhoea or inflammation or granulation tissue in the EAC after 14 days of optimum analgesia, anti-infective therapy, aural care and optimisation of immune state

Comments:

| Showing all 24 responses <a href="#">Show less</a>                                                                                                                                                                                                                                                                                                          |
|-------------------------------------------------------------------------------------------------------------------------------------------------------------------------------------------------------------------------------------------------------------------------------------------------------------------------------------------------------------|
| agree                                                                                                                                                                                                                                                                                                                                                       |
| Entirely agree                                                                                                                                                                                                                                                                                                                                              |
| OK                                                                                                                                                                                                                                                                                                                                                          |
| Does 'anti-infective therapy' need to be further defined? eg does topical therapy count? oral amox for 2 weeks meets the case definition stated above, but most of us wouldn't be surprised if not much response in a classic NOE case. Should the definition say something more specific, e.g. 'appropriate systemic (oral or IV) anti-infective therapy'? |
| agreed                                                                                                                                                                                                                                                                                                                                                      |
| I would suggest a longer time period of 4 weeks.                                                                                                                                                                                                                                                                                                            |
| Agree                                                                                                                                                                                                                                                                                                                                                       |
| Fine                                                                                                                                                                                                                                                                                                                                                        |
| Agree                                                                                                                                                                                                                                                                                                                                                       |
| I think this is fair                                                                                                                                                                                                                                                                                                                                        |
| consider in absence of immunosuppression /diabetes - if the purpose of this definition is to alter antibiotic therapy without culture results                                                                                                                                                                                                               |
| Agreed                                                                                                                                                                                                                                                                                                                                                      |
| Agree with above definition.                                                                                                                                                                                                                                                                                                                                |
| Agree                                                                                                                                                                                                                                                                                                                                                       |
| Should we state what anti infective treatment ie systemic? Cipro flocs in orally or taxocin                                                                                                                                                                                                                                                                 |
| yes                                                                                                                                                                                                                                                                                                                                                         |
| It would need at least a month of appropriate treatment before a case of NOE is classed as non-responsive to therapy. Once NOE is diagnosed the minimum period of therapy we use is 6 weeks.                                                                                                                                                                |
| perhaps define 'improvement'. (using a visual analogue scale?)You may not expect a resolution in pain. ottorrhoea or granulation in this period                                                                                                                                                                                                             |
| agreed                                                                                                                                                                                                                                                                                                                                                      |
| yes                                                                                                                                                                                                                                                                                                                                                         |
| Effective and optimised antimicrobial therapy?                                                                                                                                                                                                                                                                                                              |
| should it be specified whether the anti-infective therapy is systemic?                                                                                                                                                                                                                                                                                      |
| Agree.                                                                                                                                                                                                                                                                                                                                                      |
| agree                                                                                                                                                                                                                                                                                                                                                       |

# The following definitions have not yet reached consensus

## I. Defining a case of relapsed NOE

A case of NOE is considered to be treated and cured if a patient has no pain nor otorrhoea for a minimum period of \*1 month\* after completing antibiotic therapy

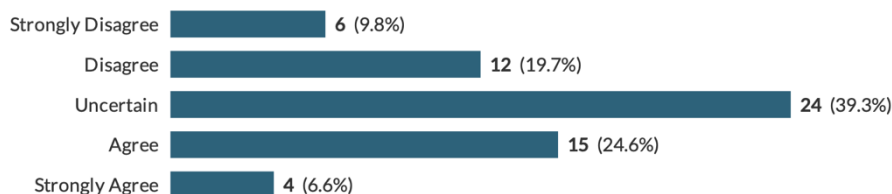

*Multi answer: Percentage of respondents who selected each answer option (e.g. 100% would represent that all this question's respondents chose that option)*

A case of NOE is considered to be treated and cured if a patient has no pain nor otorrhoea for a minimum period of \*2 months\* after completing antibiotic therapy

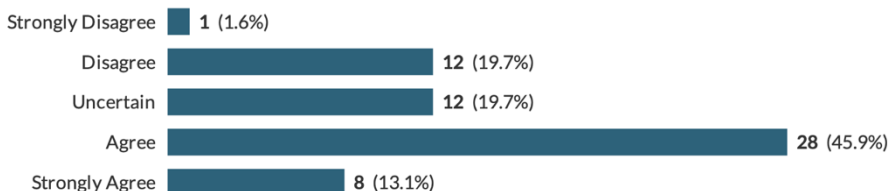

*Multi answer: Percentage of respondents who selected each answer option (e.g. 100% would represent that all this question's respondents chose that option)*

A case of NOE is considered to be treated and cured if a patient has no pain nor otorrhoea for a minimum period of \*3 months\* after completing antibiotic therapy

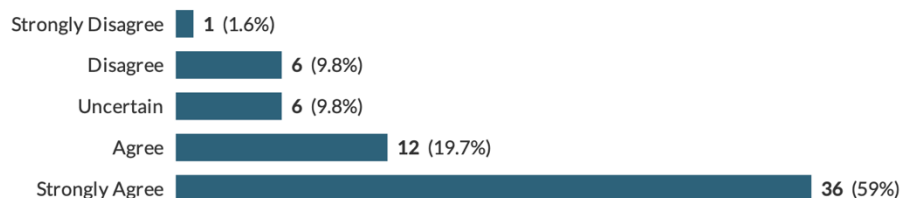

## Comments:

| Showing all 25 responses <a href="#">Show less</a> |                                                                                                                                                                                                                                                                                                                                                                                                                          |
|----------------------------------------------------|--------------------------------------------------------------------------------------------------------------------------------------------------------------------------------------------------------------------------------------------------------------------------------------------------------------------------------------------------------------------------------------------------------------------------|
|                                                    | have seen cases of relapse following a period of up to 6 months where they were reportedly asymptomatic. I think higher chance of this occurring in elderly immunocompromised individuals                                                                                                                                                                                                                                |
|                                                    | None                                                                                                                                                                                                                                                                                                                                                                                                                     |
|                                                    | It is difficult to give a time frame as all cases are different.                                                                                                                                                                                                                                                                                                                                                         |
|                                                    | I routinely get follow up scans to check changes/inflammation not worsening                                                                                                                                                                                                                                                                                                                                              |
|                                                    | I am not involved in the treatment of patients with NOE                                                                                                                                                                                                                                                                                                                                                                  |
|                                                    | Treatment failure is defined after 14 days of therapy - 1 month is probably too soon, whereas 3 months would give more confidence that relapse is unlikely. Is it worth defining early and late relapse (e.g. <1 month and > 3 months) as the cause of relapse may be different - early may indicate inadequate duration of treatment whereas late relapse may indicate the evolution of resistance or persisting nidus? |
|                                                    | Defining cure on basis of pain/otorrhoea resolution alone is concerning as most of us will have seen late relapses. Imaging would be an additional factor.                                                                                                                                                                                                                                                               |
|                                                    | If CRP changes were evident during the active infection, this can be another useful marker of resolution (ie remains low).                                                                                                                                                                                                                                                                                               |
|                                                    | 3 months                                                                                                                                                                                                                                                                                                                                                                                                                 |
|                                                    | Do we have any good data on mean time to relapse.                                                                                                                                                                                                                                                                                                                                                                        |
|                                                    | The highest incidence of recurrence is in the first 4 weeks but there is a steady tail off thereafter. 1 month is too short to claim a cure                                                                                                                                                                                                                                                                              |
|                                                    | I guess this depends on at what stage you complete antibiotics. I usually treat for an additional 2-3 months once the EAC skin is normal.                                                                                                                                                                                                                                                                                |
|                                                    | Relying on pain as a marker for cure can be dangerous as with recurrence of pain, patients can develop cranial neuropathy                                                                                                                                                                                                                                                                                                |
|                                                    | Deep seated bacterial infections can take time to present such as in discitis and pji this may be indolent and take time to present                                                                                                                                                                                                                                                                                      |
|                                                    | For me, 6 weeks would be the cutting point to consider it treated and cured.                                                                                                                                                                                                                                                                                                                                             |
|                                                    | would a repeat imaging have any role for the above if compared with baseline scans                                                                                                                                                                                                                                                                                                                                       |
|                                                    | I think the term cured requires a longer period of time of being symptom free and so I have chosen 3 months. It also takes time for MRI findings to show improvement.                                                                                                                                                                                                                                                    |
|                                                    | Most relapses occur within a few weeks to a month of stopping antibiotic. Most recurrences of infection occur within 3 months and can often be predicted by the underlying comorbidities and/or anatomical defects of the patient concerned.                                                                                                                                                                             |
|                                                    | Depends how long the course of antibiotics is. If it is at least 6 weeks then I opt for 2 months. If shorter than 3 months                                                                                                                                                                                                                                                                                               |
|                                                    | For me, the minimum cut off would be 6 weeks.                                                                                                                                                                                                                                                                                                                                                                            |
|                                                    | Like that it is clinical "cure" not radiological but time post treatment is trickier- i think 2 months feels long enough to wait but not 3 months...                                                                                                                                                                                                                                                                     |
|                                                    | Normalised inflammatory markers and lack of progression on the MRI are also critical indicators of cure                                                                                                                                                                                                                                                                                                                  |
|                                                    | I would rely on MRI imaging too                                                                                                                                                                                                                                                                                                                                                                                          |
|                                                    | Again I'd say appropriate and dose optimised antimicrobial therapy.                                                                                                                                                                                                                                                                                                                                                      |
|                                                    | I'd change all antibiotic to antimicrobial                                                                                                                                                                                                                                                                                                                                                                               |
|                                                    | Difficult, I haven't seen many relapsed cases to have a feel, I recall two who I think relapsed fairly quickly.                                                                                                                                                                                                                                                                                                          |

## II. Imaging in NOE

If the original CT scan does not show any bony changes, then if clinical suspicion is high MRI scan is indicated

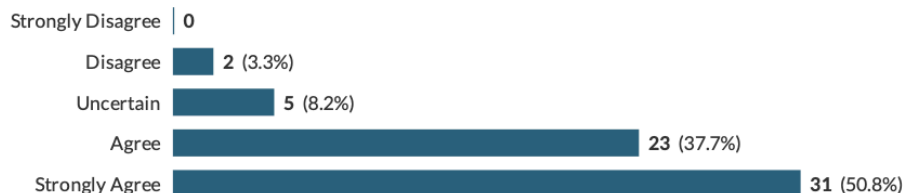

*Multi answer: Percentage of respondents who selected each answer option (e.g. 100% would represent that all this question's respondents chose that option)*

If there is suspicion of relapse of NOE a repeat CT scan is indicated

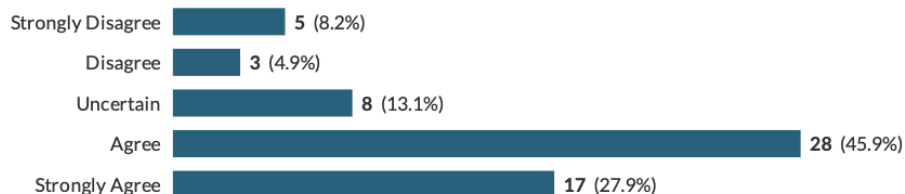

*Multi answer: Percentage of respondents who selected each answer option (e.g. 100% would represent that all this question's respondents chose that option)*

If there is suspicion of relapse of NOE and the repeat CT scan does not show any bony changes, then MRI scan is indicated

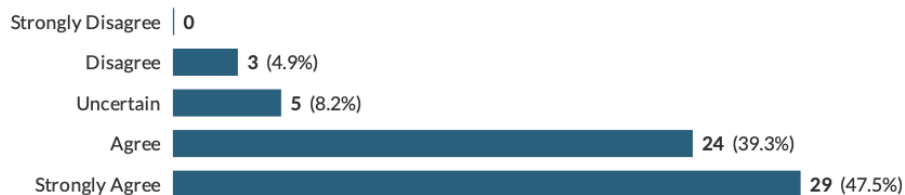

Comments:

| Showing all 21 responses <a href="#">Show less</a> |                                                                                                                                                                                                                                                                                                                                                                                        |
|----------------------------------------------------|----------------------------------------------------------------------------------------------------------------------------------------------------------------------------------------------------------------------------------------------------------------------------------------------------------------------------------------------------------------------------------------|
| 1                                                  | personally I feel that MRI's are better are looking at changes over time including relapse as it is often the soft tissue involvement extent that changes. Only severe case tend to get further bone destruction.                                                                                                                                                                      |
| 2                                                  |                                                                                                                                                                                                                                                                                                                                                                                        |
| 3                                                  |                                                                                                                                                                                                                                                                                                                                                                                        |
| 4                                                  |                                                                                                                                                                                                                                                                                                                                                                                        |
| 5                                                  |                                                                                                                                                                                                                                                                                                                                                                                        |
| 6                                                  |                                                                                                                                                                                                                                                                                                                                                                                        |
| 7                                                  |                                                                                                                                                                                                                                                                                                                                                                                        |
| 8                                                  | I am unclear about the utility of MRI for diagnosing relapse as the bony oedema may persist for weeks/months (?) and a repeat MRI scan may only be helpful if the patients have interval MRI imaging and at the end of therapy. This would have a resource implication, and potentially drive further treatment as the MRI changes are likely to lag behind CT and clinical parameters |
| 9                                                  |                                                                                                                                                                                                                                                                                                                                                                                        |
| 10                                                 |                                                                                                                                                                                                                                                                                                                                                                                        |
| 11                                                 |                                                                                                                                                                                                                                                                                                                                                                                        |
| 12                                                 |                                                                                                                                                                                                                                                                                                                                                                                        |
| 13                                                 |                                                                                                                                                                                                                                                                                                                                                                                        |
| 14                                                 |                                                                                                                                                                                                                                                                                                                                                                                        |
| 15                                                 | Unlikely to be no bony changes in a true relapse case as that was part of the criteria for original NOE diagnosis.                                                                                                                                                                                                                                                                     |
| 16                                                 |                                                                                                                                                                                                                                                                                                                                                                                        |
| 17                                                 | CT changes typically occur several weeks after the osteitis. Can therefore be late signs. CT is rarely performed AFTER resolution of NOE, therefore we have no baseline scan for comparison. Comparing to the initial diagnostic CT does not tell us when these changes occur. Gallium scan is a more time sensitive imaging modality.                                                 |
| 18                                                 |                                                                                                                                                                                                                                                                                                                                                                                        |
| 19                                                 |                                                                                                                                                                                                                                                                                                                                                                                        |
| 20                                                 |                                                                                                                                                                                                                                                                                                                                                                                        |
| 21                                                 | MR is sufficient if there was a previous CT (from first diagnosis)                                                                                                                                                                                                                                                                                                                     |
| 22                                                 |                                                                                                                                                                                                                                                                                                                                                                                        |
| 23                                                 | often more time efficient to repeat both CT and MRI as only one may not give the answer                                                                                                                                                                                                                                                                                                |
| 24                                                 |                                                                                                                                                                                                                                                                                                                                                                                        |
| 25                                                 | bony changes can remain so for beyond a year therefore CT may be difficult to interpret. More work needs to be done with PET/CT for the above                                                                                                                                                                                                                                          |
| 26                                                 |                                                                                                                                                                                                                                                                                                                                                                                        |
| 27                                                 | they all should have baseline MRI scans and in case of suspicion of relapse, MRI should be performed rather than CT and compared to the original MRI. MRI is much more sensitive to detect changes compared to CT                                                                                                                                                                      |
| 28                                                 |                                                                                                                                                                                                                                                                                                                                                                                        |
| 29                                                 | I think a pet ct would be better as further bony change is likely to be seen even when healing if the relapse is close to the initial event. A ct one year later would be acceptable but not two months after disease                                                                                                                                                                  |
| 30                                                 |                                                                                                                                                                                                                                                                                                                                                                                        |
| 31                                                 | I do not feel a second CT is required. MRI is better at tracking flare-ups.                                                                                                                                                                                                                                                                                                            |
| 32                                                 |                                                                                                                                                                                                                                                                                                                                                                                        |
| 33                                                 | The imaging modalities CT and MRI identify different tissue involvement. CT will pick up bone erosion. MRI will pick up soft tissue involvement. Bacterial infection and fungal infection also behave differently with fungal infection being more frequently associated with extension of infection into the skull base i.e. skull base osteomyelitis.                                |
| 34                                                 |                                                                                                                                                                                                                                                                                                                                                                                        |
| 35                                                 |                                                                                                                                                                                                                                                                                                                                                                                        |
| 36                                                 |                                                                                                                                                                                                                                                                                                                                                                                        |
| 37                                                 |                                                                                                                                                                                                                                                                                                                                                                                        |
| 38                                                 | If the original CT scan does not show bony changes, I would only consider MRI if the clinical suspicion was dubious and was considering other differentials. If there was a high clinical suspicion such as CN VII palsy and granulation/otorrhea in a diabetic then I'd treat as NOE without MRI.                                                                                     |
| 39                                                 |                                                                                                                                                                                                                                                                                                                                                                                        |
| 40                                                 |                                                                                                                                                                                                                                                                                                                                                                                        |
| 41                                                 | after discussion with consultant radiologist. You could have a scenario where the CT settings were not perfect for the purpose of the scan                                                                                                                                                                                                                                             |
| 42                                                 |                                                                                                                                                                                                                                                                                                                                                                                        |
| 43                                                 | CT is a poor means of monitoring NOE. Contrast enhanced T1 MRI is the gold standard                                                                                                                                                                                                                                                                                                    |
| 44                                                 |                                                                                                                                                                                                                                                                                                                                                                                        |
| 45                                                 | Relapse is a clinical diagnosis, there will not have been time for radiological changes to subside to make a diagnosis on imaging.                                                                                                                                                                                                                                                     |
| 46                                                 |                                                                                                                                                                                                                                                                                                                                                                                        |
| 47                                                 | I would tend to use MRI 1st line looking for relapses                                                                                                                                                                                                                                                                                                                                  |
| 48                                                 |                                                                                                                                                                                                                                                                                                                                                                                        |
| 49                                                 | We do an MRI scan as routine on all proven or suspicious cases of NOE.                                                                                                                                                                                                                                                                                                                 |
| 50                                                 |                                                                                                                                                                                                                                                                                                                                                                                        |
| 51                                                 | CT should be the first port of call for suspected recurrent NOE, even if the original CT was normal. Advantages due to speed, availability and difficulty of optimising and interpreting subtle cases on MRI, especially in non-specialist centres.                                                                                                                                    |
| 52                                                 |                                                                                                                                                                                                                                                                                                                                                                                        |
| 53                                                 | We use MRI for monitoring response to treatment/relapse                                                                                                                                                                                                                                                                                                                                |
| 54                                                 |                                                                                                                                                                                                                                                                                                                                                                                        |
| 55                                                 | MR and Ct are complementary - MR changes are long-lived and may not reassure despite clinical improvement, CT may be less sensitive! MDM discussion would be great if it can be funded/supported                                                                                                                                                                                       |
| 56                                                 |                                                                                                                                                                                                                                                                                                                                                                                        |
| 57                                                 | I think this neglects the very useful role on Nuclear medicine imaging (Gallium/technetium scan                                                                                                                                                                                                                                                                                        |
| 58                                                 |                                                                                                                                                                                                                                                                                                                                                                                        |
| 59                                                 |                                                                                                                                                                                                                                                                                                                                                                                        |
| 60                                                 |                                                                                                                                                                                                                                                                                                                                                                                        |

### III. MDT

Cases of definite and possible NOE should be discussed in a MDT forum ideally involving ENT, infection and radiology

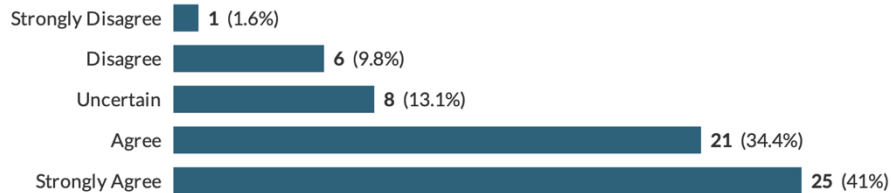

*Multi answer: Percentage of respondents who selected each answer option (e.g. 100% would represent that all this question's respondents chose that option)*

Any further comments?

Showing all 32 responses [Show less](#)

I think this is the ideal to aim for but it is difficult with such small numbers and fluctuations in numbers across the year.

May not need to be a formal MDT meeting but rather one that involves all disciplines by email or virtually

In an ideal world (well resourced) then strongly agree. Is this a UK approach, or intended to be applicable in other settings? for a global audience, this would not be possible and perhaps should be an aspiration rather than essential.

Only complex / recurring cases

There are resource issues to address but this would be a desirable practice.

Difficult to convene as cases are relatively sporadic even in large centres. A monthly/bimonthly meeting might be worthwhile (case numbers wise) but is too infrequent to inform management plan of case seen the next day.

These teams should agree protocols and work together, but a formal MDT is not required. We do not have ID on site in our unit.

So much resources. difficult to justify efficiency.

Ideally but unclear if resources to support this. Is there a role for a national MDT for difficult cases as for TB and fungal infections?

MDT working while ideal should not be mandated as it is impractical for a low volume condition and in the majority of simple cases not required.

This is a complex pathology therefore it needs an MDT approach particularly as there is the emergence of microbial resistance and multiple problems with therapy - rash, deranged LFT, neutropaenia as well as the ongoing debate about imaging to diagnose and monitor treatment response

In an ideal world - but this does not happen here

MDt may also be needed for potential ambulatory management of these cohort of patients using continue infusion devices for administering antibiotics

|    |                                                                                                                                                                                                                                                                        |
|----|------------------------------------------------------------------------------------------------------------------------------------------------------------------------------------------------------------------------------------------------------------------------|
| 1  |                                                                                                                                                                                                                                                                        |
| 2  |                                                                                                                                                                                                                                                                        |
| 3  |                                                                                                                                                                                                                                                                        |
| 4  | The MDT approach brings early care from relevant specialties to the patient thus improving outcome.                                                                                                                                                                    |
| 5  |                                                                                                                                                                                                                                                                        |
| 6  | If this is feasible depending on the size of the unit and availability of specialists.                                                                                                                                                                                 |
| 7  |                                                                                                                                                                                                                                                                        |
| 8  | I agree in theory that this would be ideal. Practically, with relatively low numbers annually (albeit anecdotally rising), I'm not sure there would be enough cases to justify a formal MDT. I would STRONGLY agree with a national cross-specialty protocol, however. |
| 9  |                                                                                                                                                                                                                                                                        |
| 10 |                                                                                                                                                                                                                                                                        |
| 11 | I have a number of patients who are treated with a good pathway however if there are issues then I discuss at teleconference with skull base surgeons                                                                                                                  |
| 12 |                                                                                                                                                                                                                                                                        |
| 13 |                                                                                                                                                                                                                                                                        |
| 14 | You may not have a microbiologist attending, but still useful to discuss                                                                                                                                                                                               |
| 15 |                                                                                                                                                                                                                                                                        |
| 16 | I don't think microbiology have to be in the MDT but should certainly be involved in the decision making. Radiology and ENT are mandatory. Some centres may also manage these patients through infectious diseases                                                     |
| 17 |                                                                                                                                                                                                                                                                        |
| 18 |                                                                                                                                                                                                                                                                        |
| 19 | Concept is good but will need to think about how this is funded                                                                                                                                                                                                        |
| 20 |                                                                                                                                                                                                                                                                        |
| 21 | Definite and possible NOE are the same thing according to previous Delphi rounds!                                                                                                                                                                                      |
| 22 |                                                                                                                                                                                                                                                                        |
| 23 | Not all centres have access to an MDT.                                                                                                                                                                                                                                 |
| 24 |                                                                                                                                                                                                                                                                        |
| 25 | Not necessarily a formal meeting though.                                                                                                                                                                                                                               |
| 26 |                                                                                                                                                                                                                                                                        |
| 27 | If there is a standard pathway for management, only the unresponsive ones need to be discussed.                                                                                                                                                                        |
| 28 |                                                                                                                                                                                                                                                                        |
| 29 | A discussion should occur but is there a requirement for all cases of NOE to be discussed in a formal MDT???                                                                                                                                                           |
| 30 |                                                                                                                                                                                                                                                                        |
| 31 | If support/funding available though.                                                                                                                                                                                                                                   |
| 32 |                                                                                                                                                                                                                                                                        |
| 33 | may not be possible in all cases                                                                                                                                                                                                                                       |
| 34 |                                                                                                                                                                                                                                                                        |
| 35 | MDT can happen virtually or via e mail discussions                                                                                                                                                                                                                     |
| 36 |                                                                                                                                                                                                                                                                        |
| 37 | I'd suggest they also need to include infection pharmacy / antimicrobial pharmacy particularly around the dose optimisation angle                                                                                                                                      |
| 38 |                                                                                                                                                                                                                                                                        |
| 39 | likely to involve discussion on a case by case basis rather than a regular MDT                                                                                                                                                                                         |
| 40 |                                                                                                                                                                                                                                                                        |
| 41 | MDT is advisable for any uncommon and potentially serious condition in principle.                                                                                                                                                                                      |
| 42 |                                                                                                                                                                                                                                                                        |
| 43 | Utilise each specialty, but a formal MDT is not essential. I would be concerned if the outcome said it can only be managed by MDT                                                                                                                                      |
| 44 |                                                                                                                                                                                                                                                                        |
| 45 | we have done this by joining up a series of two way conversations in the past. virtual platforms it will facilitate mdts within and between centres                                                                                                                    |
| 46 |                                                                                                                                                                                                                                                                        |
| 47 |                                                                                                                                                                                                                                                                        |
| 48 |                                                                                                                                                                                                                                                                        |
| 49 |                                                                                                                                                                                                                                                                        |
| 50 |                                                                                                                                                                                                                                                                        |
| 51 |                                                                                                                                                                                                                                                                        |
| 52 |                                                                                                                                                                                                                                                                        |
| 53 |                                                                                                                                                                                                                                                                        |
| 54 |                                                                                                                                                                                                                                                                        |
| 55 |                                                                                                                                                                                                                                                                        |
| 56 |                                                                                                                                                                                                                                                                        |
| 57 |                                                                                                                                                                                                                                                                        |
| 58 |                                                                                                                                                                                                                                                                        |
| 59 |                                                                                                                                                                                                                                                                        |
| 60 |                                                                                                                                                                                                                                                                        |

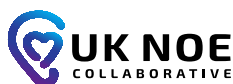

## NOE DELPHI ROUND 5

### Setting the Foundations

Thank you so much for your Round 4 replies and very helpful comments. The response rate was 75% (61/81), with 59% of these replies from ENT, 31% from Infection and 10% from Radiology specialists.

We have consensus (>70% respondents agreeing or strongly agreeing) for all of the statements included in the Round 4 questionnaire. However, some very useful points were raised, which will help to improve these definitions and their utility moving forward. For this reason, we have modified the definitions and would like to re-confirm consensus before they are finalised. Once we have your agreement, we will circulate a manuscript which will form the basis of a proposal for adoption by ENT, Infection and Radiology bodies in the UK.

When considering these definitions, we would like to emphasise the following aims:

1. They can be implemented in all centres across the UK, from a small DGH to a tertiary referral centre.
2. They aim to be highly specific (i.e. describe a typical 'definite' case of NOE and minimise the chances of misclassifying another condition), but do not necessarily describe **all** potential presentations of NOE.
3. They are for guidance only and are not prescriptive in terms of practice.
4. They allow standardised description of cases which will facilitate recruitment to clinical trials and comparison of cases across different cohorts.
5. This is the start of an iterative process. The lack of quality data is making it difficult to propose clear recommendations for some definitions. As more information becomes available these definitions will be revisited and revised.

We have been using a Delphi method in order to achieve these aims. A Delphi method is a group of facilitation techniques which employs an iterative multistage process, designed to transform opinion into a group consensus. It is a flexible approach which was developed in order to systematically synthesise expert opinion. Currently there are no universally accepted criteria for using this technique, but it has the following features: anonymity, iteration with controlled feedback from one round to the next, aggregation of group responses and expert input until consensus has been achieved.

We have highlighted the changes to the definitions from Round 4 in **red**. Where necessary, a brief explanation of the change(s) is given. We have included 4 questions in the same format as previously.

Thank you again for your contribution.

|                   |                       |                 |                |                  |
|-------------------|-----------------------|-----------------|----------------|------------------|
| Monique Andersson | Pablo Martinez-Devesa | Martin Williams | Emma Stapleton | Pieter Pretorius |
| Infection         | ENT Surgeon           | Infection       | ENT Surgeon    | Neuroradiologist |
| Oxford            | Oxford                | Bristol         | Manchester     | Oxford           |



## I. DEFINITE CASE OF NECROTISING OTITIS EXTERNA (NOE)

### Discussion following Round 4:

- i) **Imaging:** Some respondents highlighted that radiological changes suggestive of NOE may be detected by CT and/or MRI and that some centres use both modalities in the early investigation of these cases. For this reason, both modalities will be included in the definition of a definite case of NOE. There is a caveat however, namely that MRI is essentially a more sensitive modality than CT to detect early changes which might be ascribed to this diagnosis. Changes like bone marrow oedema of the temporal bone or other features may be visible on MRI when bony erosion is not yet discernible on CT. Further studies are planned to understand what changes are associated with NOE on MRI, how this compares with findings on CT and whether this difference impacts the management and outcome of NOE. We are proposing a pragmatic approach to dealing with this discrepancy until we have more data.
- ii) **Histology:** Many respondents commented that samples are not routinely sent for histological analysis and so histology excluding malignancy should not be required to make the diagnosis of a definite case of NOE.

### QUESTION 1.

A definite case of NOE is an invasive infection of the external ear canal which has the following characteristics:

- Ootalgia and otorrhoea OR otalgia and a history of otorrhoea

AND

- Granulation OR inflammation of the external auditory canal

AND

- Histological exclusion of malignancy **in cases where this is suspected**

AND

- **Radiological features consistent with NOE**

(This refers to EITHER CT imaging findings of bony erosion of the external auditory canal, together with soft tissue inflammation of the external auditory canal **OR MRI with changes consistent with NOE, for example bone marrow oedema of the temporal bone with soft tissue inflammation of the external auditory canal**).

Strongly disagree

Disagree

Uncertain

Agree

Strongly Agree

Comment: \_\_\_\_\_

## II. DEFINING SEVERE NOE

### Discussion following Round 4:

- i) **Nomenclature:** Some participants commented that the term ‘severe’ used in medicine is commonly used to describe severity of symptoms rather than complexity of disease. Indeed patients with severe NOE e.g. cranial nerve palsy may have mild pain. The term ‘severe’ has therefore been changed to ‘complex’
- ii) **Anatomical spread:** Temporomandibular joint (TMJ) involvement is commonly seen in complex disease and has been added to the common sites of disease extension from the EAC.
- iii) **The term ‘phlegmon’** has been changed to ‘soft tissue oedema or inflammation or fluid collection’

### QUESTION 2.

A case of NOE may be classified as ‘complex’ if any of the following are present:

- Facial nerve palsy or other lower cranial nerve palsy
- Cerebral venous thrombosis seen on MRI or contrast enhanced CT
- Extensive bone involvement as demonstrated by any of the following;
  - CT showing bone erosion in other skull base locations in addition to the external ear canal wall, e.g: around stylomastoid foramen, clivus, petrous apex, **temporomandibular joint**.
  - MRI showing bone marrow oedema extending to central skull-base.
  - CT or MRI showing extensive **soft tissue oedema or inflammation or fluid collection** below the skull base.
- Intracranial spread of the disease (dural thickening, extradural or subdural empyema, cerebral/cerebellar abscess)

Strongly disagree      Disagree      Uncertain      Agree      Strongly Agree

Comment: \_\_\_\_\_

## III. DEFINING ‘POSSIBLE NOE’

### Discussion following Round 4:

- i) **‘Possible NOE’ describes a case that does not meet the criteria for a definite case of NOE, but where a high degree of clinical suspicion exists. Having this category was strongly supported at Round 3. These cases may represent atypical presentations or**

may represent severe OE/early NOE. A number of participants suggested that the definition of possible NOE should include reference to the absence of radiological changes typical of a definite case of NOE, since this is a key part of the investigation of these cases.

### **QUESTION 3.**

Possible NOE is a severe infection of the external ear canal **which does not show bony erosion of the external auditory canal on CT scan OR does not show changes consistent with NOE on MRI if this is performed (for example bone marrow oedema of the temporal bone) AND** which has the following characteristics:

Otalgia and otorrhoea OR otalgia and a history of otorrhoea

AND Granulation OR inflammation of the external auditory canal

AND any of the following features

- immunodeficiency
- night pain
- raised inflammatory markers (ESR/CRP) in absence of other plausible cause
- failure to respond to >2 weeks of topical anti-infectives and aural care

Strongly disagree      Disagree      Uncertain      Agree      Strongly Agree

Comment \_\_\_\_\_

#### **IV.      DEFINING 'RELAPSED NOE'**

Consensus was reached in Round 4 that a case of NOE is considered treated and cured if a patient has no pain nor otorrhoea for a minimum period of 3 months after completing antibiotic therapy.

Relapse is recurrence of disease after the patient has been treated and cured i.e. at least three months after stopping antibiotic therapy.

#### **Discussion following Round 4:**

- i)      Symptoms: Whilst relapse may present with EAC symptoms, patients may also present with no EAC signs or symptoms, but with progression of base of skull osteomyelitis or other deep-seated complications. The definition of relapse has therefore been modified to reflect this.**
- ii)     Follow up Scanning: It was noted that the definition of relapse included the need for progression of radiological changes after demonstration of radiological improvement. Since it is not routine for many centres to perform follow-up imaging**

after resolution, the definition includes the terms ‘unchanged or progression’.

- iii) **Modality: Centres differ in their choice of modality to investigate relapse and so the definition now includes changes on CT and/or MRI.**

#### **QUESTION 4.**

A relapsed case of NOE is a serious, invasive infection which occurs **after the initial infection was considered to be treated and cured** and is characterised by:

##### **Recurrence of local disease**

- Recurrent otalgia OR recurrent otorrhoea

AND

- Recurrent granulation OR inflammation

AND

- **Unchanged or** progression of bony erosion **of the external auditory canal on CT OR unchanged or** progression of MRI changes such as bone marrow oedema of the temporal bone and soft tissue changes **of the external auditory canal.**

**AND/OR**

##### **Development or recurrence of complex disease**

- Development or worsening of a lower cranial nerve palsy, **base of skull osteomyelitis** or development or worsening of other intracranial complication deemed a consequence of NOE and supported by radiological imaging.

Strongly disagree      Disagree      Uncertain      Agree      Strongly Agree

Comment \_\_\_\_\_

Any additional final comments about the ‘NOE: Setting the foundations’ process/any specific issues \_\_\_\_\_

***Thank you for your contribution.***

***We plan to circulate the first draft of the manuscript detailing the process and outcome of this project in the next 6-8 weeks for your further input.***



**DELPHI ROUND 5 – RESULTS**  
**FEBRUARY 2021**  
**Response Rate: 79% (58/73)**

Specialty

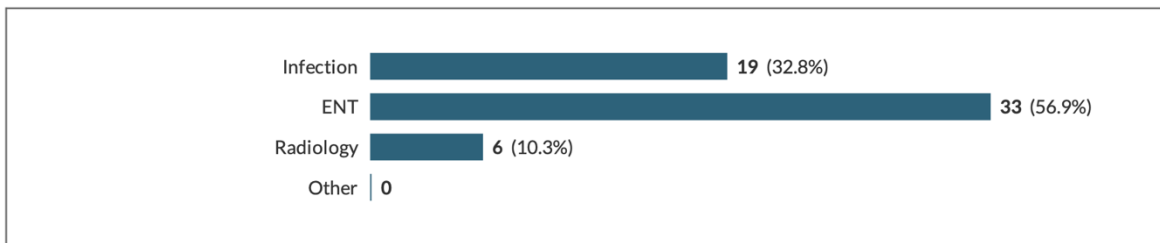

Grade

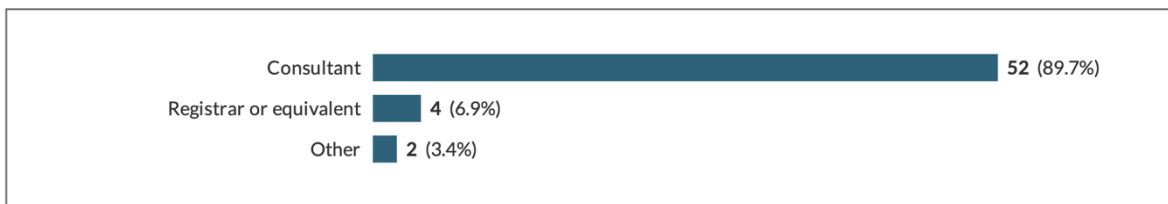

If you selected Other, please specify:

| Showing all 2 responses |                        |
|-------------------------|------------------------|
| senior otology fellow   | 708126-708117-73888958 |
| Specialty Doctor        | 708126-708117-73952284 |

## Question 1

A definite case of NOE is an invasive infection of the external ear canal which has the following characteristics:

- Otalgia and otorrhoea OR otalgia and a history of otorrhoea

AND

- Granulation OR inflammation of the external auditory canal

AND

- Histological exclusion of malignancy in cases where this is suspected

AND

- Radiological features consistent with NOE

(This refers to EITHER CT imaging findings of bony erosion of the external auditory canal, together with soft tissue inflammation of the external auditory canal **OR** MRI with changes consistent with NOE, for example bone marrow oedema of the temporal bone with soft tissue inflammation of the external auditory canal).

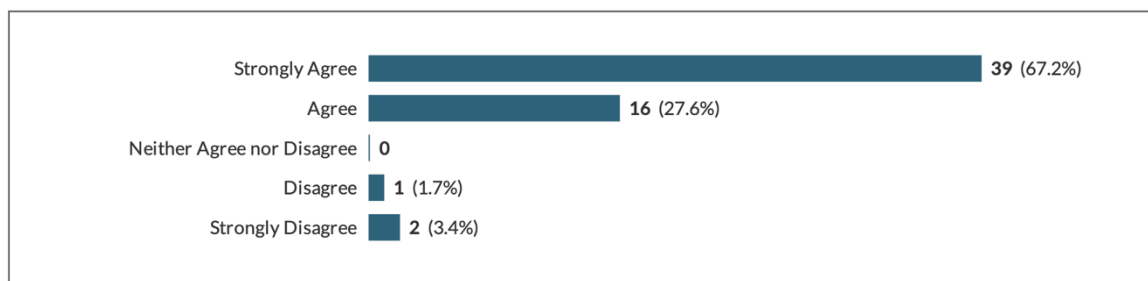

**Showing all 13 responses**

This definitely works for me. These are the 4 things that would seal a diagnosis of NOE for me, and more so if patient was diabetic.

CT scans in early NOE can be very misleading due to the lag of bony demineralization. MRI far more helpful in particular BM oedema and oedema around the TMJ and soft tissue of the infratemporal fossa structures therefore should read CT and/or MRI

if granulation/ inflammation is part of the diagnostic criteria why would you not biopsy this?

Until excluded malignancy can cause same symptoms - histological exclusion is the only definitive way of proving it.

Soft tissue oedema of the ear canal is a common finding in just OE. I think perhaps it should say something like: evidence of soft tissue inflammation extending beyond and including the external auditory canal. For me extension into retrocondylar fat is very classic for NOE.

addition of "in cases where this is suspected" makes this a workable CD

I would say that the histological exclusion of malignancy is a must if there is granulation tissue in the canal. As the symptoms and signs of NOE is sufficient to suspect malignancy.

I have found opacity in mastoid cells without gross bony erosion

should we consider having something around predisposing factors - or do you think that is covered with the "histological exclusion of malignancy". essentially NOE without underlying immunosuppression of some sort is vanishingly rare

There are often no signs in the ear canal at the time of presentation

good.

For both CT and MRI after soft tissue inflammation of the external auditory canal.. Also consider adding ... or adjacent soft tissues outside the EAC (caudal to the lateral and central skull base/TMJ etc.)

Whilst otorrhoea occurs in many cases it is not universal and I don't think this needs to be part of the diagnostic criteria.

I think that malignancy needs to be excluded in all cases. It should be suspected in every case.

MRI features of NOE aren't just about bone marrow oedema. There is often oedema of the soft tissues around the skull base, especially the masticator space

## Question 2

A case of NOE may be classified as 'complex' if any of the following are present:

- Facial nerve palsy or other lower cranial nerve palsy
- Cerebral venous thrombosis seen on MRI or contrast enhanced CT
- Extensive bone involvement as demonstrated by any of the following;
  - CT showing bone erosion in other skull base locations in addition to the external ear canal wall, e.g: around stylomastoid foramen, clivus, petrous apex, temporomandibular joint.
  - MRI showing bone marrow oedema extending to central skull-base.
  - CT or MRI showing extensive soft tissue oedema or inflammation or fluid collection below the skull base.
- Intracranial spread of the disease (dural thickening, extradural or subdural empyema, cerebral/cerebellar abscess)

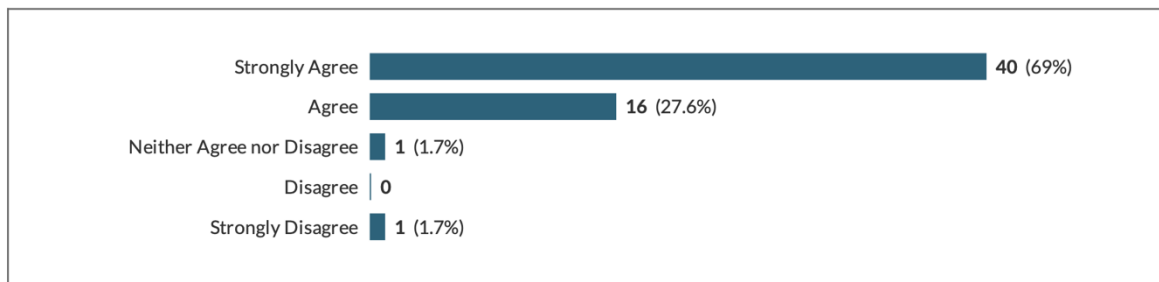

| Showing all 8 responses                                                                                                                                                                                                                                                                                                                                                                                    |  |
|------------------------------------------------------------------------------------------------------------------------------------------------------------------------------------------------------------------------------------------------------------------------------------------------------------------------------------------------------------------------------------------------------------|--|
| No issues here. Agreed.                                                                                                                                                                                                                                                                                                                                                                                    |  |
| CT or MRI showing extensive soft tissue oedema or inflammation or fluid collection. Its very common in almost all of our NOE to see oedema/inflammation in the soft tissue below the skull base. This is not necessary a poor prognostic indicator or sign of complex disease. I agree totally once disease involves neurovascular structures or crosses the mid-line then it is severe and more complex   |  |
| I think "extensive soft tissue oedema" is inexact. How do you define "extensive2. I would have thought that soft tissue changes below skull base around the tympanic ring or at the osseocartilagenous junction would be common in 'simple' NOE. What about clarifying by stating that the soft tissue changes have progressed BEYOND the tympanic ring?? I am sure better answered by a neuroradiologist. |  |
| I would suggest using the word "Advanced" or "Complicated". The word complex does not necessarily indicate progression of the original disease.                                                                                                                                                                                                                                                            |  |
| I don't like the term phlegm on at all!                                                                                                                                                                                                                                                                                                                                                                    |  |
| good definition.                                                                                                                                                                                                                                                                                                                                                                                           |  |
| I'm not keen on the term 'complex'. Perhaps 'advanced' would be better. With regards to imaging definition of 'advanced' disease, how do you define 'extensive'?                                                                                                                                                                                                                                           |  |
| Not sure how 'extensive' soft tissue oedema under the skull base will be defined - would definitely agree re collection though.                                                                                                                                                                                                                                                                            |  |



### Question 3

Possible NOE is a severe infection of the external ear canal which does not show bony erosion of the external auditory canal on CT scan OR does not show changes consistent with NOE on MRI if this is performed (for example bone marrow oedema of the temporal bone) AND which has the following characteristics:

Otalgia and otorrhoea OR otalgia and a history of otorrhoea

AND Granulation OR inflammation of the external auditory canal

AND any of the following features:

- immunodeficiency
- night pain
- raised inflammatory markers (ESR/CRP) in absence of other plausible cause
- failure to respond to >2 weeks of topical anti-infectives and aural care

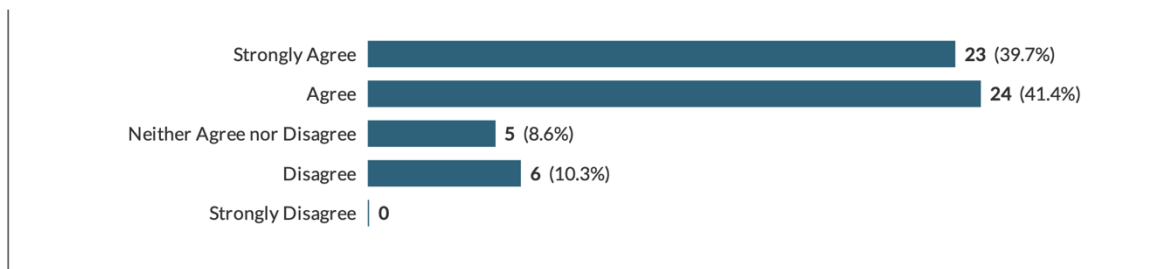

## Showing all 20 responses

is this not severe otitis externa

I agree with this but for some reason not as strongly as with the definite case, though I cannot really add anything to the definition that would strengthen it in my mind. Overall, it is a more than fair definition for a possible case.

NOE is either present or not so it is NOE or severe AOE. AOE left unchecked in the right patient profile is probably a continuum and may lead to NOE. If CT and or MRI shows no extension of inflammation beyond the auditory canal then it is severe AOE not a possible NOE this is too ambiguous and will lead to heterogenicity in future studies

Night pain and raised inflammatory markers could still be an issue in severe otitis externa

I would think MRI would show early changes of NOE so I disagree with this statement.

I would prefer to see this definition in the last section as "AND and 2 or more of the following features" as the definition above with just raised inflammatory markers is not enough in my opinion

I think chronicity or failure to respond should be and AND not just included in any of the following features

I really think that key population needs to be in this group. Will this definition include that immunodeficiency includes frail or elderly patients. For example simple OE is extremely painful and many younger fit patients present at night with severe pain so I think there needs to be something to reflect this otherwise the definition will not be very 'specific' at all. I think in the 'possible NOE' group it is even more important to ensure this reflects our clinical suspicion that NOE does not occur in the young and healthy.

Note - some also consider this as severe OE and will admit patients for symptom control.

failure to respond to oral cipro and drops as many severe OE's take longer than 2 weeks to settle.

If an MRI scan is performed and does not show any evidence of bone marrow oedema I would not consider it possible NOE since lack of bone

marrow oedema on MRI has a higher negative predictive value in my view than lack of bone erosion on CT

I would consider if immunodeficiency needs any definition - is it worth specific mention of diabetes? does extreme age/frailty count as 'immunodeficiency'?

immunodeficiency - Clearly that is easy if present but NOE is often seen in those with multiple morbidities (DM, obesity, Heart failure etc etc) and might be worth considering having 'multiple medical morbidities' as a feature

1  
2  
3  
4 If a patient has severe Otagia, Otorrhea, Granulations, Immunodeficient,  
5 Night pain, raised ESR and failing to respond to AB for 2 weeks, would the  
6 patient still be a possible NOE!! I think not having the radiological features  
7 while fulfilling the rest of the criteria should be an early NOE.

8 2 weeks is a short time frame to consider a case of OE non-responsive. I  
9 would suggest 4-6 weeks.

10 need histology to rule out other causes in absence on imaging evidence.

11 good.

12 If immunodeficiency includes DM

13 See above re: otorrohoea

14 night pain is not a feature I have traditionally related specifically to NOE.  
15 happy to be outvoted on this point  
16  
17  
18  
19

20  
21  
22  
23  
24  
25  
26  
27  
28  
29  
30  
31  
32  
33  
34  
35  
36  
37  
38  
39  
40  
41  
42  
43  
44  
45  
46  
47  
48  
49  
50  
51  
52  
53  
54  
55  
56  
57  
58  
59  
60

For peer review only

## Question 4

A relapsed case of NOE is a serious, invasive infection which occurs **after the initial infection was considered to be treated and cured** and is characterised by:

### Recurrence of local disease

- Recurrent otalgia OR recurrent otorrhoea

AND

- Recurrent granulation OR inflammation

AND

- Unchanged or progression of bony erosion of the external auditory canal on CT OR unchanged or progression of MRI changes such as bone marrow oedema of the temporal bone and soft tissue changes of the external auditory canal.

### AND/OR

### Development or recurrence of complex disease

- Development or worsening of a lower cranial nerve palsy, base of skull osteomyelitis or development or worsening of other intracranial complication deemed a consequence of NOE and supported by radiological imaging.

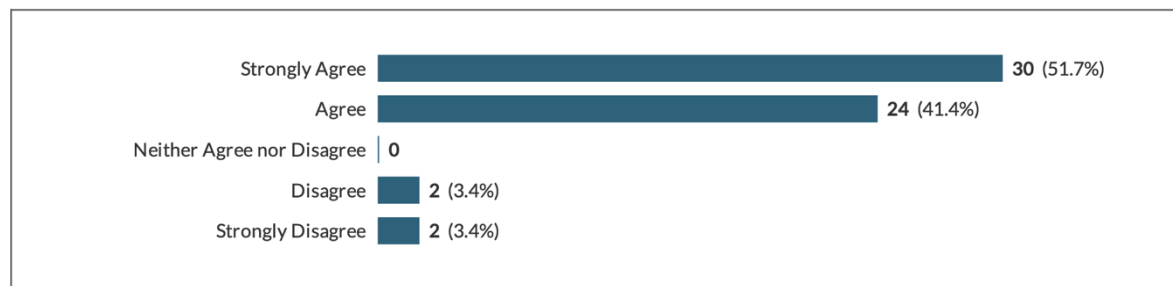

| Showing all 12 responses |                                                                               |
|--------------------------|-------------------------------------------------------------------------------|
| 1                        | Yes, agreed.                                                                  |
| 2                        |                                                                               |
| 3                        | That is fine                                                                  |
| 4                        |                                                                               |
| 5                        | I am unclear how the radiological component of 'unchanged' in the             |
| 6                        | definition of recurrence would allow differentiation between a case of O.E.   |
| 7                        | following resolved NOE versus recurrence of NOE. This part of the definition  |
| 8                        | may give rise to an overdiagnosis of recurrent NOE when in fact the patient   |
| 9                        | may have a resolved NOE followed by simple OE.                                |
| 10                       |                                                                               |
| 11                       | But you need to define what is "treated" or "cure" before you define          |
| 12                       | relapse- I would define a relapse as one within 6 months of start of first    |
| 13                       | infection and recurrence as reoccurrence of symptoms beyond 6 months.         |
| 14                       |                                                                               |
| 15                       | Some cases will relapse without Ear canal signs (granulations) so             |
| 16                       | stipulating the re-appearance of granulations by using "and" will exclude     |
| 17                       | the most serious cases of relapse, which relapse with CN palsy.               |
| 18                       | Also, most radiological changes of NOE especially the CT ones tend to last    |
| 19                       | for long time and some of them will never re-mineralize or normalise so       |
| 20                       | adding unchanged picture of radiology is not helpful. I would suggest         |
| 21                       | relapse to be recurrence of Otagia and any of the other 3 (granulations,      |
| 22                       | Progression of Radiology or complications e.g. CN palsy etc...)               |
| 23                       |                                                                               |
| 24                       | CT and MRI findings often remain "unchanged" for many months even in          |
| 25                       | treated cases (although we don't really know the natural history of these     |
| 26                       | changes).                                                                     |
| 27                       |                                                                               |
| 28                       | Not so happy with insistence on primary ear symptoms - some of these          |
| 29                       | patients have their ear symptoms cured by initial treatment and this          |
| 30                       | represents skull base disease.                                                |
| 31                       |                                                                               |
| 32                       | unchanged bone erosion requires a timeframe to be meaningful - even if        |
| 33                       | treated radiological resolution lags by several months                        |
| 34                       |                                                                               |
| 35                       | good, includes all relevant considerations.                                   |
| 36                       |                                                                               |
| 37                       | What's the definition of cure? is it symptoms gone only or does it require    |
| 38                       | change/reversal on radiology?                                                 |
| 39                       |                                                                               |
| 40                       | My only difficulty is the unchanged appearance on CT/MRI                      |
| 41                       |                                                                               |
| 42                       | I would remove 'serious and invasive' from the definition of 'relapsed NOE'   |
| 43                       | as all types of NOE are serious and invasive and, if they have been defined   |
| 44                       | as having NOE previously then by definition they must have NOE as the         |
| 45                       | cause of the relapse.                                                         |
| 46                       |                                                                               |
| 47                       | I think you need a time scale in the definition of 'relapsed NOE' ie. if they |
| 48                       | had NOE 10 years ago and they have another episode now that would not         |
| 49                       | be regarded as the same infection. I would say 'within 6 months' of the       |
| 50                       | original infection being regarded as settled.                                 |
| 51                       |                                                                               |
| 52                       | See above re: otorrhoea                                                       |
| 53                       |                                                                               |
| 54                       |                                                                               |
| 55                       |                                                                               |
| 56                       |                                                                               |
| 57                       |                                                                               |
| 58                       |                                                                               |
| 59                       |                                                                               |
| 60                       |                                                                               |

Any additional final comments about the 'NOE: Setting the foundations' process / any specific issues?

**Showing all 10 responses**

The additions are all valuable and pertinent

see Q3 - I think this is v important so that you dont include lots of patients with simple OE.

These definitions have improved a great deal through this iterative process - well done!

I agree the diagnostic criteria is much tighter with these additions to the definitions.

the definitions nearly make it compulsory to perform both CT and MRI

well done - thank you!

So need a definition of cure! and then define difference between a relapse versus a reoccurrence. well done though nearly there !

Well done, a difficult challenge but we have succeeded in achieving a solid consensus that works in the clinical setting. Thank you, Fiona.

These are good definitions

W Only
