# Supplementary material for: UK consensus definitions for necrotising otitis externa: a Delphi study
Source: PubMed Central journal article supplement — BMJ Open. 2023 Feb 20;13(2):e061349. doi: 10.1136/bmjopen-2022-061349 (PMC9945308; doi:10.1136/bmjopen-2022-061349), 2023-02-20
Supplement: bmjopen-2022-061349supp002.pdf [file bmjopen-2022-061349supp002.pdf]

# Diagnostic Criteria for Necrotising Otitis Externa: Setting The Foundations

Thank you for your participation in Round 1. Respondents from Round 1 will be invited to take part in Round 2. Please use the same email address used in Round 1, to which this second round survey has been sent.

For Round 2 we have analysed the results of Round 1 in accordance with commonly accepted criteria[1], and incorporated your comments to design a set of questions which we hope will bring us closer to achieving consensus for a case definition for definite NOE. Relevant results from Round 1 are presented prior to the corresponding questions below; you may find the charts helpful when responding to these second round questions.

In addition, we aim to define: probable NOE, severe NOE, relapsed NOE and non-responding NOE

The case definition of NOE should include every true case of NOE and exclude every case that may have some features of, but is not truly NOE.

We have included one question on indications for imaging as this is a likely to be key variable in classifying cases.

At the end of the survey we have given you the opportunity to add any questions that you think should have been included or to make any general comments.

We aim to publish this Delphi process and the conclusions of this process. Everyone who completes both Round 1 and 2 will be credited as a collaborator.

[1]. Diamond IR, Grant RC, Feldman BM, Pencharz PB, Ling SC, Moore AM, et al. DeQning consensus: a systematic review recommends methodologic criteria for reporting of Delphi studies. *J Clin Epidemiol.* 2014;67:401–09]
