# Supplementary material for: UK consensus definitions for necrotising otitis externa: a Delphi study
Source: PubMed Central journal article supplement — BMJ Open. 2023 Feb 20;13(2):e061349. doi: 10.1136/bmjopen-2022-061349 (PMC9945308; doi:10.1136/bmjopen-2022-061349), 2023-02-20
Supplement: bmjopen-2022-061349supp003.pdf [file bmjopen-2022-061349supp003.pdf]

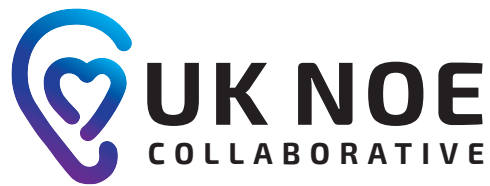

## Outcomes from Delphi Round 2: NOE Case Definition

### DEFINITE CASE

#### 1a. Symptoms: MAJOR symptoms - necessarily present for all definite cases of NOE:

| Consensus                                  | No Consensus                                             |
|--------------------------------------------|----------------------------------------------------------|
| <b>Otalgia AND otorrhoea INCLUDE (86%)</b> | Otalgia OR otorrhoea<br>Otalgia alone<br>Otorrhoea alone |

#### 1b. Symptoms: MINOR symptoms - which MAY be present for all definite cases of NOE:

| Consensus                         | No consensus                                |
|-----------------------------------|---------------------------------------------|
| <b>Night pain - INCLUDE (81%)</b> | Facial pain<br>Trismus<br>Headache<br>Fever |

#### 1c. What number of minor symptoms should be present , together with major symptoms, to define a true case:

- 0 – 35.7%
- 1 – 25.7%
- 2 – 22.9%
- 3 – 14.3%
- 4 – 1.4%

#### 2. A true case of DEFINITE NOE will have the following clinical signs:

| Consensus                                                                                                                                            | No consensus                            |
|------------------------------------------------------------------------------------------------------------------------------------------------------|-----------------------------------------|
| <b>EAC granulation AND inflammation - INCLUDE (80%)</b><br><b>EAC granulation OR inflammation - INCLUDE (79%)</b><br><b>No signs - EXCLUDE - 89%</b> | Inflammation alone<br>Granulation alone |

#### 3. A true case of DEFINITE NOE will have the following findings on imaging:

| Consensus                                                                                                                                                                                                                            | No consensus                                                                     |
|--------------------------------------------------------------------------------------------------------------------------------------------------------------------------------------------------------------------------------------|----------------------------------------------------------------------------------|
| <b>Bone erosion EAC CT - INCLUDE (87%)</b><br><b>Soft tissue EAC CT - INCLUDE (81%)</b><br><b>Bone erosion AND soft tis EAC - INCLUDE (79%)</b><br><b>CT soft tis - T1 MR - INCLUDE (81%)</b><br><b>Normal CT/MR - EXCLUDE (87%)</b> | Bone erosion OR soft tissue<br>Isolated SBOM from source other than EAC excluded |

**4a. INVESTIGATION: A true case of DEFINITE NOE will have the following findings on histology:**

| Consensus                                                                                                                                       | No consensus                                                          |
|-------------------------------------------------------------------------------------------------------------------------------------------------|-----------------------------------------------------------------------|
| Malignancy excluded - INCLUDE (87%)<br>Inflammation confirmed - INCLUDE (83%)<br>Malignancy excluded AND inflammation confirmed - INCLUDE (93%) | Excludes malignancy or confirms inflammation<br><br>Histo always sent |

**4b. INVESTIGATION: A true case of DEFINITE NOE will have the following biochemistry/haematology findings:**

| Consensus | No consensus             |
|-----------|--------------------------|
|           | Raised CRP<br>Raised ESR |

**5. Regarding risk factors for DEFINITE NOE: NO CONSENSUS** The patient will be always frail or immunosuppressed (diabetic, steroid therapy, malignancy, biologic therapy, HIV infected etc.)

**COMMENTS**

- CT alone may lag behind actual bony destruction
- Changes in time are also useful in confirming or refuting definite NOE - e.g. Improvement with treatment on serial imaging
- As a radiologist who has seen many cases of NOE, I believe that even streakiness to the parapharyngeal fat in the appropriate clinical context is sufficient to diagnose NOE and we have had many cases treated as such
- There may be no signs in the ear and the patient has got skull base Osteomyelitis, if the patient had been treated before hand but not adequately.
- minor criteria don't necessarily need to be present, but might be helpful in the absence of definite radiological features eg no bone erosion but soft tissue swelling present, having multiple minor criteria present +/- immunosuppression could be sufficient for a definite diagnosis.
- Certain criteria together make it a DEFINITE NOE. For example a facial palsy AND granulation tissue (even without evidence of bony erosion on CT). We should incorporate that somehow ideally.
- T1 enhanced imaging is an important modality in the diagnosis of NOE

- Granulation tissue is inflammatory tissue, it is formed in response to inflammation, I don't see how one can have granulation tissue without inflammation in the canal.
- Regarding immunosuppression, advancing age is an important risk factor in itself without necessarily implying frailty.

## PROBABLE CASE

### 1a. Symptoms: MAJOR symptoms - necessarily present for all probable cases of NOE:

| Consensus                           | No Consensus                                             |
|-------------------------------------|----------------------------------------------------------|
| Otalgia AND otorrhoea INCLUDE (81%) | Otalgia OR otorrhoea<br>Otalgia alone<br>Otorrhoea alone |

### 1b. Symptoms: MINOR symptoms - which MAY be present for all probable cases of NOE:

| Consensus                  | No consensus                                                   |
|----------------------------|----------------------------------------------------------------|
| Night pain - INCLUDE (71%) | Facial pain<br>Facial weakness<br>Trismus<br>Headache<br>Fever |

### 1c. What number of minor symptoms should be present , together with major symptoms, to define a probable case:

- 0 – 22.9%
- 1 – 32.9%
- 2 – 30%
- 3 – 11.4%
- 4 – 2.9%

### 2. A case of PROBABLE NOE will have the following clinical signs:

| Consensus                                                                   | No consensus                                                                  |
|-----------------------------------------------------------------------------|-------------------------------------------------------------------------------|
| EAC granulation OR inflammation - INCLUDE (81%)<br>No signs - EXCLUDE - 81% | EAC granulation AND inflammation -<br>Inflammation alone<br>Granulation alone |

### 3. A case of PROBABLE NOE will have the following findings on imaging

| Consensus                                                                               | No consensus                  |
|-----------------------------------------------------------------------------------------|-------------------------------|
| Soft tissue swelling of external ear canal will be visible on CT or MRI - INCLUDE - 87% | CT scan excludes bony erosion |

### 4a. INVESTIGATION: A case of PROBABLE NOE will have the following findings on histology

| Consensus                                                             | No consensus                                 |
|-----------------------------------------------------------------------|----------------------------------------------|
| <b>Inflammation confirmed - INCLUDE (86%)</b>                         | Excludes malignancy or confirms inflammation |
| <b>Malignancy excluded AND inflammation confirmed - INCLUDE (80%)</b> | Histo always sent                            |

**4b. INVESTIGATION: A case of PROBABLE NOE will have the following biochemistry/haematology findings:**

| Consensus                      | No consensus |
|--------------------------------|--------------|
| <b>CRP MAY be raised - 83%</b> | Raised CRP   |
| <b>ESR MAY be raised - 86%</b> | Raised ESR   |

**5. Regarding risk factors for PROBABLE NOE: NO CONSENSUS** The patient will be always frail or immunosuppressed (diabetic, steroid therapy, malignancy, biologic therapy, HIV infected etc.)

**COMMENTS**

- Bony erosion on CT would confirm NOE in the correct setting but a lack of bone erosion does not exclude it. If there are risk factors, marked soft tissue changes and/or persistent clinical concern I would advocate baseline MRI to assess for bone oedema and serial imaging to assess response to treatment. My concerns would be either missing NOE if we image early in the course but also missing malignancy if we box patients into NOE diagnosis.
- Repeated ear trauma (eg in-ear headphone use) is risk factor in immunocompetent/ non-frail individuals, ear syringing and hearing aid use
- Probable NOE in my mind is the group of patients where the clinical symptoms and signs are compatible but the imaging may not be complete ( CT without MRI for example) or unable to tolerate MRI all sequences. They do not need to have an immunosuppression risk factor to meet a case definition.
- I'm not confident that I understand how you will use these answers e.g. Symptoms: MINOR symptoms - which MAY be present for all probable cases of NOE - I don't see how something can be MAY and present in ALL. Also ...A case of PROBABLE NOE will have the following findings on imaging: CT scan excludes bony erosion - you mean WILL -they may because its not perfectly sensitive...?
- the length of duration of symptoms also important
- Also I have disagreed with facial weakness for probably NOE because I think it is more of an indicator of definite NOE!
- Probably diagnosis still shouldn't just be oedema of external canal, should show some evidence of tissue of the external ear and beyond otherwise this is simple otitis externa at that point. Doesn't have to show bone erosion. CRP and ESR May be raised but I don't believe it always has to be, have seen patients with limited raised blood serological marker

**SEVERE CASE**

- 1. Which of the following features present in a definite case of NOE would meet criteria for severe disease?**

| Consensus                                                                                                                                              | No consensus                               |
|--------------------------------------------------------------------------------------------------------------------------------------------------------|--------------------------------------------|
| <b>Cerebral venous thrombosis - INCLUDE - 89%</b><br><b>Lower cranial nerve palsy INCLUDE 99%</b><br><b>Disease spread contralaterally INCLUDE 81%</b> | Elevated Inflammatory markers (ESR or CRP) |

**2. One or a combination of how many of these features in a definite case of NOE should meet criteria for severe disease?**

| Consensus                | No consensus |
|--------------------------|--------------|
| <b>1 - INCLUDE - 70%</b> | >1, >2, >3   |

**3. The following features on MR are suggestive of severe disease (MR as imaging modality reached consensus):**

| Consensus                                                                                                                                                  | No consensus |
|------------------------------------------------------------------------------------------------------------------------------------------------------------|--------------|
| <b>Soft tis/fluid collection below skull base - INCLUDE - 70%</b><br><b>Intracranial involvement - INCLUDE- 91%</b><br><b>Central SBOM - INCLUDE - 88%</b> |              |

**4. The following features on CT are suggestive of severe disease (CT as imaging modality reached consensus):**

| Consensus                                                                                                                                                   | No consensus                 |
|-------------------------------------------------------------------------------------------------------------------------------------------------------------|------------------------------|
| <b>Bone erosion of stylomastoid foramen walls - INCLUDE - 73%</b><br><b>Intracranial involvement - INCLUDE - 93%</b><br><b>Central SBOM - INCLUDE - 91%</b> | Soft tissue below skull base |

**COMMENTS**

- Facial weakness should be included in the list of features
- Are we delineating between NOE and Skull base osteomyelitis? Whilst they may be part of the same spectrum, they can appear and act as separate diseases.
- Skull base osteomyelitis is a different disease entity to NOE and should be investigated and managed on its own merits.
- Central skull base without obvious clinical history to support an ear cause I believe is a separate entity to NOE, though in the same family per se.
- I would regard any complication (facial nerve involvement, collection, TMJ involvement/septic arthritis, thrombosis, intracranial spread) as severe, or extensive skull base involvement
- would consider broader terms used for bony erosion on CT as may be variable distributions not just around the SMF e.g. EAC alone, TMJ, extension into mastoid and/or petrous apex

- I would have thought that severe disease we more of a clinical severity rather than radiological, the neurology and physical impairment being most prominent.
- I am struggling to know without a radiological grading score which of these changes on CT or MRI I would classify as severe versus non severe but definite NOE that is why we need a way of grading the imaging
- for some of the radiology I would rely on specialised radiologist input

## RELAPSED CASE

### 1. The following SYMPTOMS suggest a relapsed case:

| Consensus                                                                                                                                                                                                                                                                                                                                                                                             | No consensus |
|-------------------------------------------------------------------------------------------------------------------------------------------------------------------------------------------------------------------------------------------------------------------------------------------------------------------------------------------------------------------------------------------------------|--------------|
| <p><b>Worsening otalgia after improvement after treatment completed - INCLUDE 96%</b></p> <p><b>Worsening otorrhoea after improvement after treatment completed -INCLUDE 71%</b></p> <p><b>Worsening otalgia AND otorrhoea after improvement after treatment completed -INCLUDE - 77%</b></p> <p><b>Worsening otalgia OR otorrhoea after improvement after treatment completed -INCLUDE - 74%</b></p> |              |

### 2. The following SIGNS suggests a relapsed case

| Consensus                                                                                                                                                                                                                                                                                                                                                                                 | No consensus |
|-------------------------------------------------------------------------------------------------------------------------------------------------------------------------------------------------------------------------------------------------------------------------------------------------------------------------------------------------------------------------------------------|--------------|
| <p><b>Recurrent granulation after resolution and tx completed - INCLUDE - 87%</b></p> <p><b>Recurrent inflammation after resolution and tx completed - INCLUDE - 77%</b></p> <p><b>Recurrent granulation AND inflammation after resolution and tx completed - INCLUDE - 77%</b></p> <p><b>Recurrent granulation OR inflammation after resolution and tx completed - INCLUDE - 74%</b></p> |              |

### 3. The following IMAGING findings suggest a relapsed case

| Consensus                                                                                                                                                                                                              | No consensus |
|------------------------------------------------------------------------------------------------------------------------------------------------------------------------------------------------------------------------|--------------|
| <p><b>Progression bony erosion or bone marrow oedema after improvement - INCLUDE - 93%</b></p> <p><b>Increased soft tissue after improvement - INCLUDE - 89%</b></p> <p><b>No role for imagine - EXCLUDE - 82%</b></p> |              |

### 4. The following INVESTIGATION results suggest a relapsed case:



|                                                           |                                      |
|-----------------------------------------------------------|--------------------------------------|
| Consensus                                                 | No consensus                         |
| Rising ESR after treatment completed - -<br>INCLUDE – 70% | Rising CRP after treatment completed |

**5. Regarding the duration off from treatment prior to diagnosis of relapse (not treatment failure) – NO CONSENSUS: 1 week, 2 weeks, 2 months**

**COMMENTS**

- Variable times commented from 1 week to 3 months based on frequency of imaging
- We find gallium scans are useful for monitoring for treatment response and relapsed disease, or for disease progression. It is the only imaging that gives "real time" data. CT erosive findings are late. MRI oedema takes a long time to resolve. Is there any point in defining the difference between incompletely treated and relapsed disease? if the patient is worsening (at any stage), they need more treatment.
- is there enough evidence to define this between 2 weeks and 2 months post treatment
- unless antibiotic treatment is standardised, the definition for 'relapse' is subject to bias/ Would need ID guidance on the duration of treatment completion to be able to confidently answer Q5
- Any signs or symptoms after treatment cessation has been agreed should constitute a relapse.
- I think relapse is when the patient's condition mainly pain/headache deteriorates after a period of being asymptomatic as patient can still be down graded to oral AB and can get a recurrence of symptoms.
- It is technically a "relapse" of that infection. Better to use the term recurrence of NOE instead of relapse? and then define relapse as return of symptoms/signs at any point after Completion of treatment and recurrence as having to have a minimum gap of one month off treatment?
- I don't think inflammatory markers are reliable markers of active infection but would worry if raised.
- It depends how we define 'cure' or cessation of treatment
- If a patient reaches 2 months post-diagnosis is it another (new) infection?
- increase in time after treatment completed adds to the confidence in the diagnosis of relapse

## NON-RESPONSE TO TREATMENT

---

### 1. Symptoms

| Consensus                                                                                                                                                                   | No consensus |
|-----------------------------------------------------------------------------------------------------------------------------------------------------------------------------|--------------|
| <b>Worsening otalgia on treatment - INCLUDE 91%</b><br><b>Worsening otorrhoea on treatment - INCLUDE 70%</b><br><b>Both - INCLUDE 76%</b><br><b>Either/or - INCLUDE 73%</b> |              |

### 2. Signs

| Consensus                                                                                                                                             | No consensus         |
|-------------------------------------------------------------------------------------------------------------------------------------------------------|----------------------|
| <b>Worsening granulation on treatment - INCLUDE 70%</b><br><b>Worsening inflammation on treatment - INCLUDE 77%</b><br><b>Either or - INCLUDE 71%</b> | Both - IGNORE? - 66% |

### 3. Imaging

| Consensus                                                                                                                                                                                                                                | No consensus          |
|------------------------------------------------------------------------------------------------------------------------------------------------------------------------------------------------------------------------------------------|-----------------------|
| <b>Progression bony erosion whilst on treatment - INCLUDE 77%</b><br><b>Progression bone erosion to other parts skull base except EAC - INCLUDE 84%</b><br><b>Progression bone marrow oedema/enhancement skull base MR - INCLUDE 77%</b> | Increased soft tissue |

### 4. Investigations

| Consensus | No consensus                                                                         |
|-----------|--------------------------------------------------------------------------------------|
|           | Rising CRP on treatment<br>Rising ESR on treatment Exclusion malignancy on histology |

### 5. Duration on treatment prior to diagnosis of non-response:

| Consensus                      | No consensus       |
|--------------------------------|--------------------|
| <b>Min 3/7 - EXCLUDE - 79%</b> | 5<br>7<br>10<br>14 |

---

## IMAGING

### Imaging in Otitis Externa

| Consensus                                                                                                                                                                                                                                                                                                        | No consensus                                                                                                                                                                                    |
|------------------------------------------------------------------------------------------------------------------------------------------------------------------------------------------------------------------------------------------------------------------------------------------------------------------|-------------------------------------------------------------------------------------------------------------------------------------------------------------------------------------------------|
| <p><b>No role in severe/persistent - EXCLUDE - 87%</b></p> <p><b>Imaging in severe/persistent when abx failed - INCLUDE 80%</b></p> <p><b>Severe pain INCLUDE - 74%</b></p> <p><b>Night pain INCLUDE - 74%</b></p> <p><b>Lower CN palsies INCLUDE - 100%</b></p> <p><b>Immunosuppression - include - 76%</b></p> | <p>Imaging is only indicated in severe/persistent OE where there has been failure of antibiotic therapy AND risk factors* (diabetes, Immunocompromise etc) for NOE are present</p> <p>Polyp</p> |

### Imaging in NOE

| Consensus                                            | No consensus                                                                                                                                                                                                                                                                                            |
|------------------------------------------------------|---------------------------------------------------------------------------------------------------------------------------------------------------------------------------------------------------------------------------------------------------------------------------------------------------------|
| <p><b>CT 1<sup>st</sup> line - INCLUDE - 87%</b></p> | <p>MR 1<sup>st</sup> line</p> <p>If CT shows swelling of external auditory canal but no bone erosion then MRI should be performed</p> <p>If CT shows no swelling of external auditory canal or bone erosion then MRI should be performed</p> <p>PET-CT should be performed if CT and MRI are normal</p> |
