# Supplementary material for: UK consensus definitions for necrotising otitis externa: a Delphi study
Source: PubMed Central journal article supplement — BMJ Open. 2023 Feb 20;13(2):e061349. doi: 10.1136/bmjopen-2022-061349 (PMC9945308; doi:10.1136/bmjopen-2022-061349), 2023-02-20
Supplement: bmjopen-2022-061349supp004.pdf [file bmjopen-2022-061349supp004.pdf]



**UK NOE**  
COLLABORATIVE

NOV  
21

**UK NOE Collaborative Inaugural Meeting & Case Definition Workshop**

by UK NOE Collaborative

[Follow](#)

Free

#### Description

We would greatly appreciate your presence at the UK NOE Collaborative Inaugural Meeting. A key aim of this meeting will be to agree a case definition for NOE. It is hoped this definition will be endorsed by ENT UK and the British Infection Association and used in subsequent work in the UK.

Prior to the meeting, outputs from the online Delphi process will be circulated for review.

The venue (in central Oxford) will be confirmed and details circulated once number of attendees are known. We would therefore be grateful if you could confirm attendance asap.

Provisional Programme:

1200 - 1300: Lunch

1300 - 1400: Introduction to Collaborative & Future Plans

1400 - 1500: Case Definition Workshop 1

1500 - 1530: Tea & Coffee

1530 - 1630: Case Definition Workshop 2

1630 - 1700: Closing Remarks

#### Date and time

Thu, 21 November 2019

12:00 - 17:00 GMT

[Add to calendar](#)

#### Location

Oxford. Venue TBC.

Oxford

[View Map](#)
