# Supplementary material for: UK consensus definitions for necrotising otitis externa: a Delphi study
Source: PubMed Central journal article supplement — BMJ Open. 2023 Feb 20;13(2):e061349. doi: 10.1136/bmjopen-2022-061349 (PMC9945308; doi:10.1136/bmjopen-2022-061349), 2023-02-20
Supplement: bmjopen-2022-061349supp007.pdf [file bmjopen-2022-061349supp007.pdf]

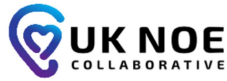

## DELPHI ROUND 4 – RESULTS NOVEMBER 2020 Response Rate: 76% (61/80)

### Specialty

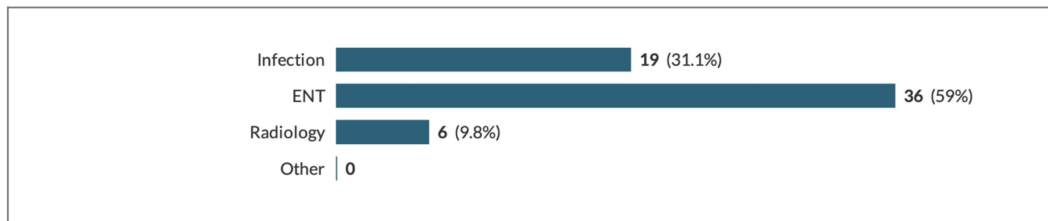

### Grade

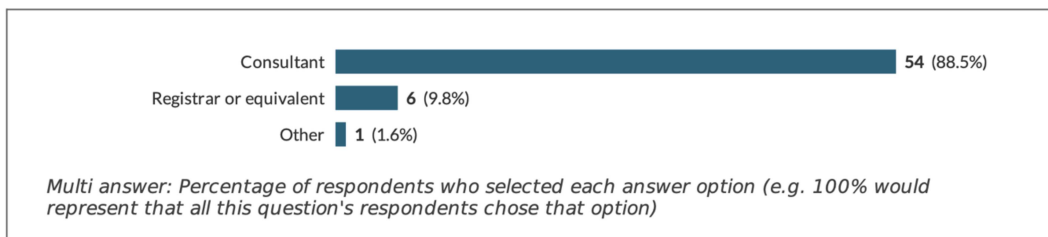

If you selected Other, please specify:

| Showing 1 response                |                        |
|-----------------------------------|------------------------|
| Senior Otology and Implant Fellow | 662153-662144-67468810 |

## The following definitions have already received consensus:

### **I. Defining a true case of Necrotising Otitis Externa (NOE)**

NOE is an invasive infection of the external ear canal which has the following characteristics:

- Ootalgia and otorrhoea OR otalgia and a history of otorrhoea

AND

- Granulation OR inflammation of the external auditory canal

AND

- CT imaging findings of bony erosion of the external auditory canal, together with soft tissue inflammation of the external auditory canal

AND

-is confirmed by exclusion of malignancy on histology

## Comments:

| Showing all 33 responses <a href="#">Show less</a>                                                                                                                                                                                                                                                                                             |
|------------------------------------------------------------------------------------------------------------------------------------------------------------------------------------------------------------------------------------------------------------------------------------------------------------------------------------------------|
| I agree apart from the final one. If there is no granulation tissue, no biopsy will be taken. Generalised swollen ear canal would not be biopsied but would be NOE so I think this needs to at least have a qualifying footnote to say (if granulation tissue/polyp present)                                                                   |
| I would say that you don't just have to have bone erosion, you need soft tissue involvement beyond the external auditory canal (TMJ/skull base)                                                                                                                                                                                                |
| Entirely agree                                                                                                                                                                                                                                                                                                                                 |
| Agreed                                                                                                                                                                                                                                                                                                                                         |
| Should 'a history of otorrhoea' be defined as 'a recent history'? (If so, then we need to define 'recent', but this could be reasonably broad/vague). I think the imaging should be defined as CT or MRI - if the patient happens to have had MRI as first line (without a CT) they shouldn't be excluded from the case definition.            |
| 'is confirmed by exclusion of malignancy on histology' in practice is aspirational. Our ENT surgeons very rarely send histology samples                                                                                                                                                                                                        |
| Agree                                                                                                                                                                                                                                                                                                                                          |
| We have seen a few cases of little or no pain, but with clear bony destruction of EAC bone. We are not certain why these are painless. Diabetic neuropathy has been suggested.                                                                                                                                                                 |
| 'confirmed by exclusion of malignancy on histology' although correct in my experience occurs <50% time.                                                                                                                                                                                                                                        |
| Not all cases have samples sent for histology. Whilst it is preferable to have malignancy excluded if possible, I don't think this is a requisite for making a diagnosis fo NOE.                                                                                                                                                               |
| in our institute 40% CT false negative in early NOE. MRI with contrast far more sensitive and specific                                                                                                                                                                                                                                         |
| Agree                                                                                                                                                                                                                                                                                                                                          |
| Bony erosion may not be evident on CT in early cases so this needs to be highlighted                                                                                                                                                                                                                                                           |
| I think this is good that we have opted for a gold standard definition albeit in practice histology is rarely performed in my experience                                                                                                                                                                                                       |
| not all cases can get a biopsy                                                                                                                                                                                                                                                                                                                 |
| The last point suggests that ALL patients must be biopsied and also raises the question as to where to biopsy from as the superficial inflammatory appearances may mask a deeper seated neoplasm. I am not sure biopsy is mandatory in all cases?                                                                                              |
| Agree with above definition.                                                                                                                                                                                                                                                                                                                   |
| Agree                                                                                                                                                                                                                                                                                                                                          |
| Agree                                                                                                                                                                                                                                                                                                                                          |
| Imaging - if CT normal but MR shows inflammation of marrow I would still deem that to be a true case.                                                                                                                                                                                                                                          |
| Does a biopsy HAVE to be done to call it a true case. If so I am going to struggle to include the majority of our cases!                                                                                                                                                                                                                       |
| Seems reasonable, but where does this leave the patient with a persistent area of exposed bone in the floor of the external ear canal, but no bone erosion confirmed by CT. Can we say 'ideally CT imaging findings of bony erosion'?                                                                                                          |
| Severe intractable pain not responding to topical treatment, not just otalgia, is a key symptom. Sometimes there is just soft tissue involvement on MRI without bony erosion on CT. it may be better to make this AND/OR. The presence of diabetes or immunocompromisr is not pathognomic but if present certainly makes NOE much more likely. |
| We have a problem of cases where the patient presents with complications of NOE eg. cranial nerve palsy but does not have bony erosion of the temporal bone. How should these cases be classified?                                                                                                                                             |
| Very reasonable                                                                                                                                                                                                                                                                                                                                |
| agreed                                                                                                                                                                                                                                                                                                                                         |
| Agree                                                                                                                                                                                                                                                                                                                                          |
| Does it have to have bone erosion. What if there is extensive inflammatory soft tissue change and marrow signal change on MR?                                                                                                                                                                                                                  |
| yes                                                                                                                                                                                                                                                                                                                                            |
| "true case" or confirmed case?                                                                                                                                                                                                                                                                                                                 |
| Patients will often present with a normal ear canal, local infection there having resolved as it spread medially                                                                                                                                                                                                                               |
| Tissue biopsy for histology is not commonly done in my centre, rather only done if poor response to antibiotic or relapse. It isn't always easy to do a biopsy.                                                                                                                                                                                |
| Agree, but CT finding can be subtle in terms of bone erosion, in which case if clinically NOE, treat as such if CT equivocal / soft tissue only                                                                                                                                                                                                |

## II. Defining a case of severe NOE

A case of NOE may be classified as 'severe' if any of the following are present;

- Facial nerve palsy or other lower cranial nerve palsy
- Cerebral venous thrombosis seen on MRI or contrast enhanced CT
- Extensive bone involvement as demonstrated by any of the following;
  - CT showing bone erosion in other skull base locations in addition to the external ear canal wall, e.g: around stylomastoid foramen, clivus, petrous apex.
  - MRI showing bone marrow oedema extending to central skull-base.
  - CT or MRI showing extensive soft tissue phlegmon below the skull base.
- Intracranial spread of the disease (dural thickening, extradural or subdural empyema, cerebral/cerebellar abscess)

## Comments:

| Showing all 25 responses <a href="#">Show less</a>                                                                                                                                                                                                                                                                                                                                                                                                      |
|---------------------------------------------------------------------------------------------------------------------------------------------------------------------------------------------------------------------------------------------------------------------------------------------------------------------------------------------------------------------------------------------------------------------------------------------------------|
| agree                                                                                                                                                                                                                                                                                                                                                                                                                                                   |
| Entirely agree                                                                                                                                                                                                                                                                                                                                                                                                                                          |
| Agreed                                                                                                                                                                                                                                                                                                                                                                                                                                                  |
| I agree with these as severe local/anatomical features.<br>I am not certain, but wanted to raise whether any systemic features should be considered (new onset delirium, renal impairment etc, without another cause). On balance, these are probably 'complex' rather than 'severe' disease, and therefore are reasonably left out?                                                                                                                    |
| happy with this                                                                                                                                                                                                                                                                                                                                                                                                                                         |
| Something about unresponsive cases (culture -ve cases) would be helpful here                                                                                                                                                                                                                                                                                                                                                                            |
| Agree                                                                                                                                                                                                                                                                                                                                                                                                                                                   |
| Agree                                                                                                                                                                                                                                                                                                                                                                                                                                                   |
| Happy with this                                                                                                                                                                                                                                                                                                                                                                                                                                         |
| Agree                                                                                                                                                                                                                                                                                                                                                                                                                                                   |
| about right                                                                                                                                                                                                                                                                                                                                                                                                                                             |
| Agreed                                                                                                                                                                                                                                                                                                                                                                                                                                                  |
| Agree with above definition.                                                                                                                                                                                                                                                                                                                                                                                                                            |
| Agree                                                                                                                                                                                                                                                                                                                                                                                                                                                   |
| What about to TMJ - seen several cases of this                                                                                                                                                                                                                                                                                                                                                                                                          |
| Agreed                                                                                                                                                                                                                                                                                                                                                                                                                                                  |
| It isn't just erosion of bone marrow. I would just say bone and leave out the marrow. It's inflammation that is seen on the MRI and not necessarily oedema. Not sure I like the term phlegmon. It's a bit 18th century. Perhaps better to say extensive soft tissue involvement of the skull base. Other complications such as Gradenigo's would also be classified as severe. Similarly one occasionally sees abscess formation within the skull base. |
| as per the comment above - only a definite cases of NOE can have severe NOE                                                                                                                                                                                                                                                                                                                                                                             |
| Instead of 'severe NOE' perhaps it should be call 'complicated NOE' people use the term 'Severe' to describe anything that is painful. A change in nomenclature will prevent clinicians using the term 'severe' as descriptor of symptoms, when in NOE (as is currently proposed) it is used as a descriptor clinical and radiological signs                                                                                                            |
| agreed                                                                                                                                                                                                                                                                                                                                                                                                                                                  |
| Agree                                                                                                                                                                                                                                                                                                                                                                                                                                                   |
| yes                                                                                                                                                                                                                                                                                                                                                                                                                                                     |
| fair enough                                                                                                                                                                                                                                                                                                                                                                                                                                             |
| Agree!                                                                                                                                                                                                                                                                                                                                                                                                                                                  |
| agree                                                                                                                                                                                                                                                                                                                                                                                                                                                   |

### III. CT scan is the first choice of imaging modality for a suspected case of NOE

Comments:

| Showing all 26 responses <a href="#">Show less</a>                                                                                                                                                              |
|-----------------------------------------------------------------------------------------------------------------------------------------------------------------------------------------------------------------|
| happy with this but feel that MRI should be completed as it picks up the odd cases (recently had an inflammatory condition and have exclude malignancy). plus I also feel it is more useful for follow up.      |
| Entirely agree                                                                                                                                                                                                  |
| yes                                                                                                                                                                                                             |
| yes                                                                                                                                                                                                             |
| happy with this                                                                                                                                                                                                 |
| Agree                                                                                                                                                                                                           |
| Agree                                                                                                                                                                                                           |
| Agree                                                                                                                                                                                                           |
| No if I had a choice it would be post contrast MRI but this is not always possible due to availability (rare today) metal foreign bodies, implants and claustrophobia. CT/PET may then need to be considered    |
| This was extensively discussed at the Oxford meeting but if we have agreed from the experienced radiologists that this is the case can we make it more specific ie. a FLAIR SEQUENCE WITH CONTRAST. For example |
| Agreed                                                                                                                                                                                                          |
| Agree with CT as first choice of imaging because not all units have access to MRI.                                                                                                                              |
| Agree                                                                                                                                                                                                           |
| Yes                                                                                                                                                                                                             |
| Yes                                                                                                                                                                                                             |
| Definitely not. It is very important to do both CT and MRI.                                                                                                                                                     |
| I'm becoming less convinced about this as I see more and more cases. CT is the most easily accessible imaging modality but MR is better, both for diagnosis abs as a baseline for monitoring.                   |
| CT is the first choice imaging modality while an MRI is also done at the same time to assess soft tissue involvement                                                                                            |
| Not controversial                                                                                                                                                                                               |
| agreed                                                                                                                                                                                                          |
| Yes                                                                                                                                                                                                             |
| I wouldn't be too didactic, CT and MR are both good tests for NOE, MR is more sensitive to soft tissue and marrow changes.                                                                                      |
| yes                                                                                                                                                                                                             |
| Changes often more obvious on MRI once disease has spread medially - I would not specify modality                                                                                                               |
| Agree                                                                                                                                                                                                           |
| agree                                                                                                                                                                                                           |

#### IV. Defining a case of 'possible'<sup>[1]</sup> NOE

Possible<sup>1</sup> NOE is a severe infection of the external ear canal which has the following characteristics:

Otalgia and otorrhoea OR otalgia and a history of otorrhoea

AND Granulation OR inflammation of the external auditory canal

AND any of the following features

- immunodeficiency
- night pain
- raised inflammatory markers (ESR/CRP) in absence of other plausible cause

failure to respond to >2 weeks of topical anti-infectives and aural care

---

<sup>[1]</sup> See definition section

## Comments:

| Showing all 28 responses <a href="#">Show less</a>                                                                                                                                                                                                                                                      |
|---------------------------------------------------------------------------------------------------------------------------------------------------------------------------------------------------------------------------------------------------------------------------------------------------------|
| agree                                                                                                                                                                                                                                                                                                   |
| Entirely agree                                                                                                                                                                                                                                                                                          |
| This is a good definition                                                                                                                                                                                                                                                                               |
| yes - is there a need to specify how immunodeficiency is defined? important to make sure this term is regarded broadly enough to include diabetes. Does being very old and frail with co-morbid problems count as being 'immunodeficient'? (for the purposes of this definition, I would say yes).      |
| happy with this                                                                                                                                                                                                                                                                                         |
| failure to respond is divisive as might be used as easy get out clause. Nominally this includes all diabetics with otitis which is quite a big patient group and a definition like this may open the floodgates for referrals.                                                                          |
| agree                                                                                                                                                                                                                                                                                                   |
| This very similar to the Friedmann and Cohen obligatory and possible criteria of definite NOE. I think if the and was changed to or for the last 4 criteria (immunodeficiency, night pain, raised markers and failure to adequate treatment) would be more non-specific. As it stands its very specific |
| Agree                                                                                                                                                                                                                                                                                                   |
| This is a very clinical definition which for possible is appropriate. Are we able to define the population better. Does this ever present like this is under 18 year olds or even in young adults. I feel it may not                                                                                    |
| seems ok                                                                                                                                                                                                                                                                                                |
| An alternative term could be 'severe OE'                                                                                                                                                                                                                                                                |
| Agree with above definition.                                                                                                                                                                                                                                                                            |
| Agree                                                                                                                                                                                                                                                                                                   |
| Agree                                                                                                                                                                                                                                                                                                   |
| So essentially "possible" becomes anyone without imaging and "true" becomes only those ones who get a biopsy? I am not sure this quite works, for us the true would be the top criteria but without mandating it is CT, occasionally might jsut have had MR and often no biopsy.                        |
| Seems reasonable. Do we need a category of 'Probable NOE'?                                                                                                                                                                                                                                              |
| A lot of the criteria for possible NOE are not in the definition of true NOE. That doesn't seem logical (see comments above re: immunosupression and intractable, non-responding pain)                                                                                                                  |
| is the failure to respond part of the any features? I think it should be definitely in the definition as this moves it from severe OE to possible NOE                                                                                                                                                   |
| Possible is the same as definite according to previous Delphi rounds.                                                                                                                                                                                                                                   |
| NICE definition of Acute Otitis externa is below 3 weeks. Any failure to respond after 3 weeks of treatment should be investigated for NOE                                                                                                                                                              |
| not controversial                                                                                                                                                                                                                                                                                       |
| agreed                                                                                                                                                                                                                                                                                                  |
| ok                                                                                                                                                                                                                                                                                                      |
| What about not responding to appropriate and or repeated courses of oral abx                                                                                                                                                                                                                            |
| fair enough                                                                                                                                                                                                                                                                                             |
| "Immunodeficiency including diabetes mellitus"                                                                                                                                                                                                                                                          |
| agree                                                                                                                                                                                                                                                                                                   |



## V. Defining a NOE case of non-response to therapy

A case of NOE is defined as non-responsive to therapy if:

There is no improvement in otalgia or otorrhoea or inflammation or granulation tissue in the EAC after 14 days of optimum analgesia, anti-infective therapy, aural care and optimisation of immune state

Comments:

| Showing all 24 responses <a href="#">Show less</a>                                                                                                                                                                                                                                                                                                         |
|------------------------------------------------------------------------------------------------------------------------------------------------------------------------------------------------------------------------------------------------------------------------------------------------------------------------------------------------------------|
| agree                                                                                                                                                                                                                                                                                                                                                      |
| Entirely agree                                                                                                                                                                                                                                                                                                                                             |
| OK                                                                                                                                                                                                                                                                                                                                                         |
| Does 'anti-infective therapy' need to be further defined? eg does topical therapy count? oral amox for 2 weeks meets the case definition stated above, but most of us wouldn't be surprised if not much response in a classic NOE case. Should the definition say something more specific, e.g. 'appropriate systemic (oral or IV) anti-infective therapy? |
| agreed                                                                                                                                                                                                                                                                                                                                                     |
| I would suggest a longer time period of 4 weeks.                                                                                                                                                                                                                                                                                                           |
| Agree                                                                                                                                                                                                                                                                                                                                                      |
| Fine                                                                                                                                                                                                                                                                                                                                                       |
| Agree                                                                                                                                                                                                                                                                                                                                                      |
| I think this is fair                                                                                                                                                                                                                                                                                                                                       |
| consider in absence of immunosuppression /diabetes - if the purpose of this definition is to alter antibiotic therapy without culture results                                                                                                                                                                                                              |
| Agreed                                                                                                                                                                                                                                                                                                                                                     |
| Agree with above definition.                                                                                                                                                                                                                                                                                                                               |
| Agree                                                                                                                                                                                                                                                                                                                                                      |
| Should we state what anti infective treatment ie systemic? Cipro flocs in orally or taxocin                                                                                                                                                                                                                                                                |
| yes                                                                                                                                                                                                                                                                                                                                                        |
| It would need at least a month of appropriate treatment before a case of NOE is classed as non-responsive to therapy. Once NOE is diagnosed the minimum period of therapy we use is 6 weeks.                                                                                                                                                               |
| perhaps define 'improvement'. (using a visual analogue scale?)You may not expect a resolution in pain. ottorrhoea or granulation in this period                                                                                                                                                                                                            |
| agreed                                                                                                                                                                                                                                                                                                                                                     |
| yes                                                                                                                                                                                                                                                                                                                                                        |
| Effective and optimised antimicrobial therapy?                                                                                                                                                                                                                                                                                                             |
| should it be specified whether the anti-infective therapy is systemic?                                                                                                                                                                                                                                                                                     |
| Agree.                                                                                                                                                                                                                                                                                                                                                     |
| agree                                                                                                                                                                                                                                                                                                                                                      |

## The following definitions have not yet reached consensus

### I. Defining a case of relapsed NOE

A case of NOE is considered to be treated and cured if a patient has no pain nor otorrhoea for a minimum period of \*1 month\* after completing antibiotic therapy

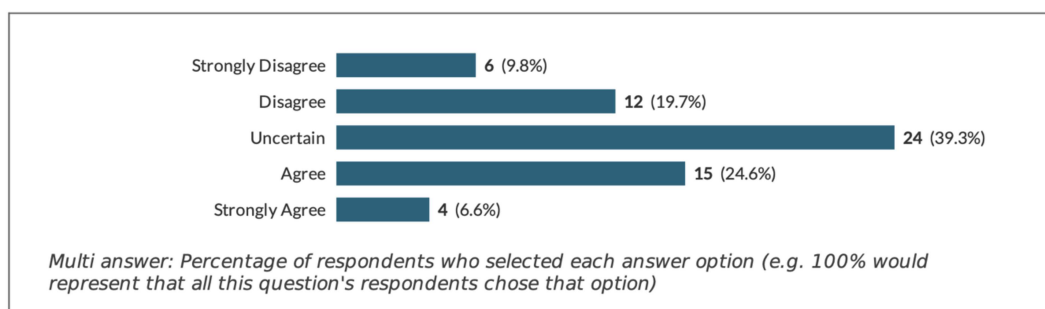

A case of NOE is considered to be treated and cured if a patient has no pain nor otorrhoea for a minimum period of \*2 months\* after completing antibiotic therapy

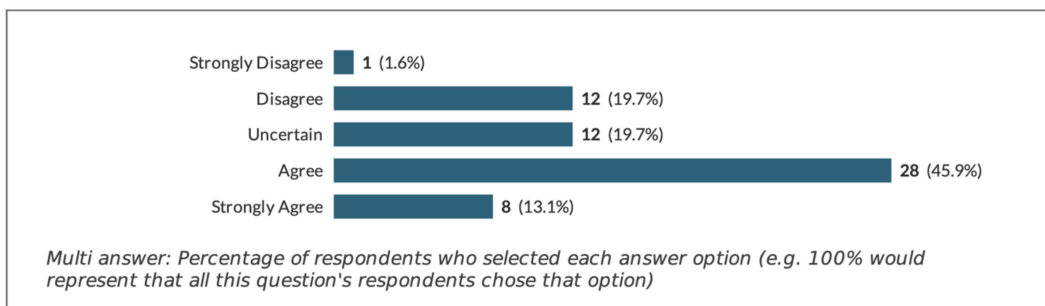

A case of NOE is considered to be treated and cured if a patient has no pain nor otorrhoea for a minimum period of \*3 months\* after completing antibiotic therapy

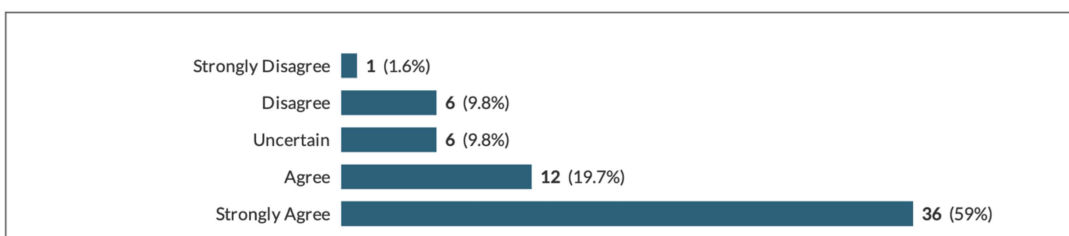

## Comments:

| Showing all 25 responses <a href="#">Show less</a>                                                                                                                                                                                                                                                                                                                                                                       |
|--------------------------------------------------------------------------------------------------------------------------------------------------------------------------------------------------------------------------------------------------------------------------------------------------------------------------------------------------------------------------------------------------------------------------|
| have seen cases of relapse following a period of up to 6 months where they were reportedly asymptomatic. I think higher chance of this occurring in elderly immunocompromised individuals                                                                                                                                                                                                                                |
| None                                                                                                                                                                                                                                                                                                                                                                                                                     |
| It is difficult to give a time frame as all cases are different.                                                                                                                                                                                                                                                                                                                                                         |
| I routinely get follow up scans to check changes/inflammation not worsening                                                                                                                                                                                                                                                                                                                                              |
| I am not involved in the treatment of patients with NOE                                                                                                                                                                                                                                                                                                                                                                  |
| Treatment failure is defined after 14 days of therapy - 1 month is probably too soon, whereas 3 months would give more confidence that relapse is unlikely. Is it worth defining early and late relapse (e.g. <1 month and > 3 months) as the cause of relapse may be different - early may indicate inadequate duration of treatment whereas late relapse may indicate the evolution of resistance or persisting nidus? |
| Defining cure on basis of pain/otorrhoea resolution alone is concerning as most of us will have seen late relapses. Imaging would be an additional factor.                                                                                                                                                                                                                                                               |
| If CRP changes were evident during the active infection, this can be another useful marker or resolution (ie remains low).                                                                                                                                                                                                                                                                                               |
| 3 months                                                                                                                                                                                                                                                                                                                                                                                                                 |
| Do we have any good data on mean time to relapse.                                                                                                                                                                                                                                                                                                                                                                        |
| The highest incidence of recurrence is in the first 4 weeks but there is a steady tail off thereafter. 1 month is too short to claim a cure                                                                                                                                                                                                                                                                              |
| I guess this depends on at what stage you complete antibiotics. I usually treat for an additional 2-3 months once the EAC skin is normal.                                                                                                                                                                                                                                                                                |
| Relying on pain as a marker for cure can be dangerous as with recurrence of pain, patients can develop cranial neuropathy                                                                                                                                                                                                                                                                                                |
| Deep seated bacterial infections can take time to present such as in dis it is and pji this may be indolent and take time to present                                                                                                                                                                                                                                                                                     |
| For me, 6 weeks would be the cutting point to consider it treated and cured.                                                                                                                                                                                                                                                                                                                                             |
| would a repeat imaging have any role for the above if compared with baseline scans                                                                                                                                                                                                                                                                                                                                       |
| I think the term cured requires a longer period of time of being symptom free and so I have chosen 3 months. It also takes time for MRI findings to show improvement.                                                                                                                                                                                                                                                    |
| Most relapses occur within a few weeks to a month of stopping antibiotic.<br>Most recurrences of infection occur within 3 months and can often be predicted by the underlying comorbidities and/or anatomical defects of the patient concerned.                                                                                                                                                                          |
| Depends how long the course of antibiotics is. If it is at least 6 weeks then I opt for 2 months. If shorter than 3 months                                                                                                                                                                                                                                                                                               |
| For me, the minimum cut off would be 6 weeks.                                                                                                                                                                                                                                                                                                                                                                            |
| Like that it is clinical "cure" not radiological but time post treatment is trickier- i think 2 months feels long enough to wait but not 3 months...                                                                                                                                                                                                                                                                     |
| Normalised inflammatory markers and lack of progression on the MRI are also critical indicators of cure                                                                                                                                                                                                                                                                                                                  |
| I would rely on MRI imaging too                                                                                                                                                                                                                                                                                                                                                                                          |
| Again I'd say appropriate and dose optimised antimicrobial therapy.                                                                                                                                                                                                                                                                                                                                                      |
| I'd change all antibiotic to antimicrobial                                                                                                                                                                                                                                                                                                                                                                               |
| Difficult, I haven't seen many relapsed cases to have a feel, I recall two who I think relapsed fairly quickly.                                                                                                                                                                                                                                                                                                          |

## II. Imaging in NOE

If the original CT scan does not show any bony changes, then if clinical suspicion is high MRI scan is indicated

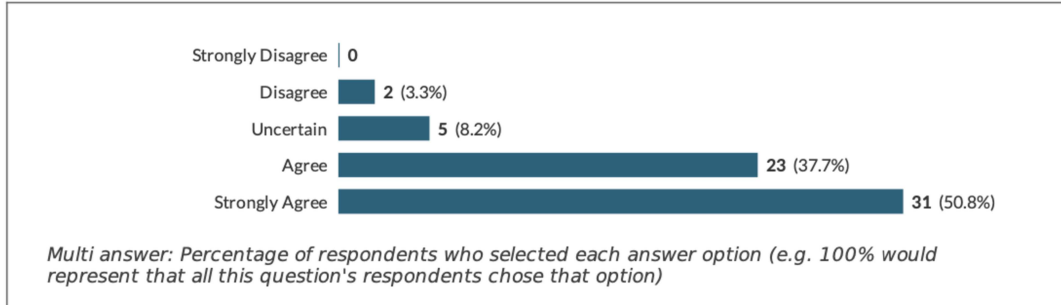

If there is suspicion of relapse of NOE a repeat CT scan is indicated

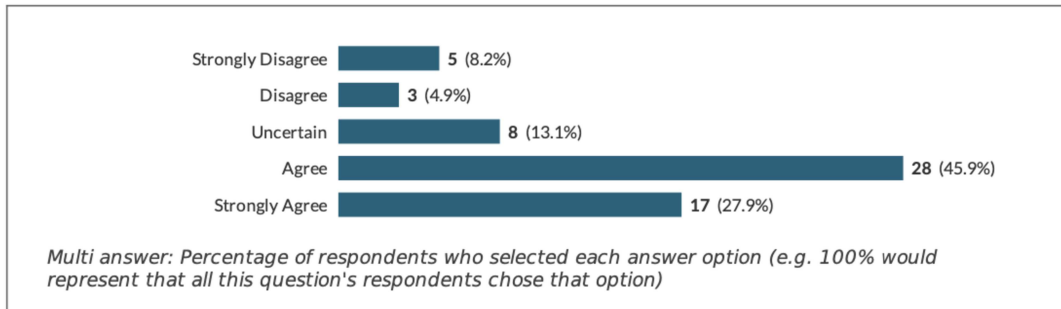

If there is suspicion of relapse of NOE and the repeat CT scan does not show any bony changes, then MRI scan is indicated

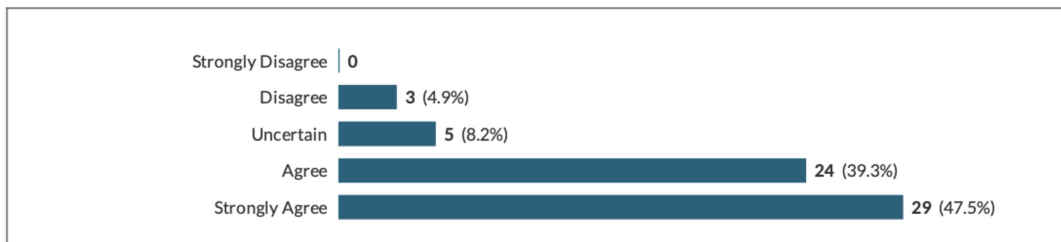

## Comments:

| Showing all 21 responses <a href="#">Show less</a>                                                                                                                                                                                                                                                                                                                                     |
|----------------------------------------------------------------------------------------------------------------------------------------------------------------------------------------------------------------------------------------------------------------------------------------------------------------------------------------------------------------------------------------|
| personally I feel that MRI's are better are looking at changes over time including relapse as it is often the soft tissue involvement extent that changes. Only severe cases tend to get further bone destruction.                                                                                                                                                                     |
| I am unclear about the utility of MRI for diagnosing relapse as the bony oedema may persist for weeks/months (?) and a repeat MRI scan may only be helpful if the patients have interval MRI imaging and at the end of therapy. This would have a resource implication, and potentially drive further treatment as the MRI changes are likely to lag behind CT and clinical parameters |
| Unlikely to be no bony changes in a true relapse case as that was part of the criteria for original NOE diagnosis.                                                                                                                                                                                                                                                                     |
| CT changes typically occur several weeks after the osteitis. Can therefore be late signs. CT is rarely performed AFTER resolution of NOE, therefore we have no baseline scan for comparison. Comparing to the initial diagnostic CT does not tell us when these changes occur. Gallium scan is a more time sensitive imaging modality.                                                 |
| MR is sufficient if there was a previous CT (from first diagnosis)                                                                                                                                                                                                                                                                                                                     |
| often more time efficient to repeat both CT and MRI as only one may not give the answer                                                                                                                                                                                                                                                                                                |
| bony changes can remain so for beyond a year therefore CT may be difficult to interpret. More work needs to be done with PET/CT for the above                                                                                                                                                                                                                                          |
| they all should have baseline MRI scans and in case of suspicion of relapse, MRI should be performed rather than CT and compared to the original MRI. MRI is much more sensitive to detect changes compared to CT                                                                                                                                                                      |
| I think a PET/CT would be better as further bony change is likely to be seen even when healing if the relapse is close to the initial event. A CT one year later would be acceptable but not two months after disease                                                                                                                                                                  |
| I do not feel a second CT is required. MRI is better at tracking flare-ups.                                                                                                                                                                                                                                                                                                            |
| The imaging modalities CT and MRI identify different tissue involvement. CT will pick up bone erosion. MRI will pick up soft tissue involvement. Bacterial infection and fungal infection also behave differently with fungal infection being more frequently associated with extension of infection into the skull base i.e. skull base osteomyelitis.                                |
| If the original CT scan does not show bony changes, I would only consider MRI if the clinical suspicion was dubious and was considering other differentials. If there was a high clinical suspicion such as CN VII palsy and granulation/otorrhea in a diabetic then I'd treat as NOE without MRI.                                                                                     |
| after discussion with consultant radiologist. You could have a scenario where the CT settings were not perfect for the purpose of the scan                                                                                                                                                                                                                                             |
| CT is a poor means of monitoring NOE. Contrast enhanced T1 MRI is the gold standard                                                                                                                                                                                                                                                                                                    |
| Relapse is a clinical diagnosis, there will not have been time for radiological changes to subside to make a diagnosis on imaging.                                                                                                                                                                                                                                                     |
| I would tend to use MRI 1st line looking for relapses                                                                                                                                                                                                                                                                                                                                  |
| We do an MRI scan as routine on all proven or suspicious cases of NOE.                                                                                                                                                                                                                                                                                                                 |
| CT should be the first port of call for suspected recurrent NOE, even if the original CT was normal. Advantages due to speed, availability and difficulty of optimising and interpreting subtle cases on MRI, especially in non-specialist centres.                                                                                                                                    |
| We use MRI for monitoring response to treatment/relapse                                                                                                                                                                                                                                                                                                                                |
| MR and CT are complementary - MR changes are long-lived and may not reassure despite clinical improvement, CT may be less sensitive! MDM discussion would be great if it can be funded/supported                                                                                                                                                                                       |
| I think this neglects the very useful role on Nuclear medicine imaging (Gallium/technetium scan)                                                                                                                                                                                                                                                                                       |

### III. MDT

Cases of definite and possible NOE should be discussed in a MDT forum ideally involving ENT, infection and radiology

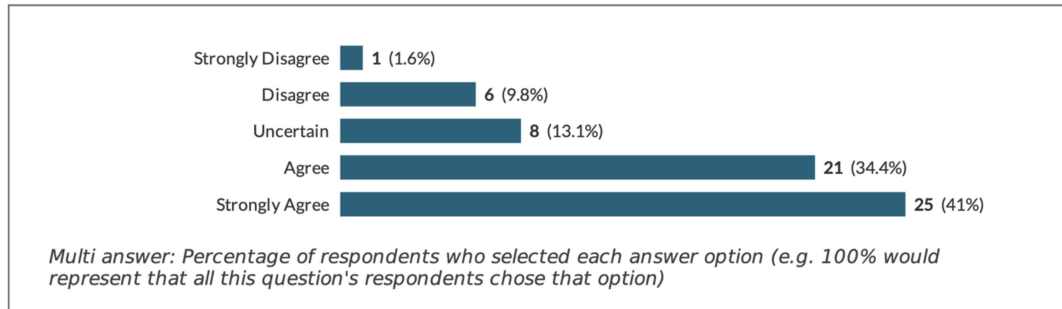

Any further comments?

| Showing all 32 responses <a href="#">Show less</a>                                                                                                                                                                                                                                         |
|--------------------------------------------------------------------------------------------------------------------------------------------------------------------------------------------------------------------------------------------------------------------------------------------|
| I think this is the ideal to aim for but it is difficult with such small numbers and fluctuations in numbers across the year.                                                                                                                                                              |
| May not need to be a formal MDT meeting but rather one that involves all disciplines by email or virtually                                                                                                                                                                                 |
| In an ideal world (well resourced) then strongly agree. Is this a UK approach, or intended to be applicable in other settings? for a global audience, this would not be possible and perhaps should be an aspiration rather than essential.                                                |
| Only complex / recurring cases                                                                                                                                                                                                                                                             |
| There are resource issues to address but this would be a desirable practice.                                                                                                                                                                                                               |
| Difficult to convene as cases are relatively sporadic even in large centres. A monthly/bimonthly meeting might be worthwhile (case numbers wise) but is too infrequent to inform management plan of case seen the next day.                                                                |
| These teams should agree protocols and work together, but a formal MDT is not required. We do not have ID on site in our unit.                                                                                                                                                             |
| So much resources. difficult to justify efficiency.                                                                                                                                                                                                                                        |
| Ideally but unclear if resources to support this. Is there a role for a national MDT for difficult cases as for TB and fungal infections?                                                                                                                                                  |
| MDT working while ideal should not be mandated as it is impractical for a low volume condition and in the majority of simple cases not required.                                                                                                                                           |
| This is a complex pathology therefore it needs an MDT approach particularly as there is the emergence of microbial resistance and multiple problems with therapy - rash, deranged LFT, neutropaenia as well as the ongoing debate about imaging to diagnose and monitor treatment response |
| In an ideal world - but this does not happen here                                                                                                                                                                                                                                          |
| MDt may also be needed for potential ambulatory management of these cohort of patients using continue infusion devices for administering antibiotics                                                                                                                                       |

|                                                                                                                                                                                                                                                                        |
|------------------------------------------------------------------------------------------------------------------------------------------------------------------------------------------------------------------------------------------------------------------------|
| The MDT approach brings early care from relevant specialties to the patient thus improving outcome.                                                                                                                                                                    |
| If this is feasible depending on the size of the unit and availability of specialists.                                                                                                                                                                                 |
| I agree in theory that this would be ideal. Practically, with relatively low numbers annually (albeit anecdotally rising), I'm not sure there would be enough cases to justify a formal MDT. I would STRONGLY agree with a national cross-specialty protocol, however. |
| I have a number of patients who are treated with a good pathway however if there are issues then I discuss at teleconference with skull base surgeons                                                                                                                  |
| You may not have a microbiologist attending, but still useful to discuss                                                                                                                                                                                               |
| I don't think microbiology have to be in the MDT but should certainly be involved in the decision making. Radiology and ENT are mandatory. Some centres may also manage these patients through infectious diseases                                                     |
| Concept is good but will need to think about how this is funded                                                                                                                                                                                                        |
| Definite and possible NOE are the same thing according to previous Delphi rounds!                                                                                                                                                                                      |
| Not all centres have access to an MDT.                                                                                                                                                                                                                                 |
| Not necessarily a formal meeting though.                                                                                                                                                                                                                               |
| If there is a standard pathway for management, only the unresponsive ones need to be discussed.                                                                                                                                                                        |
| A discussion should occur but is there a requirement for all cases of NOE to be discussed in a formal MDT???                                                                                                                                                           |
| If support/funding available though.                                                                                                                                                                                                                                   |
| may not be possible in all cases                                                                                                                                                                                                                                       |
| MDT can happen virtually or via e mail discussions                                                                                                                                                                                                                     |
| I'd suggest they also need to include infection pharmacy / antimicrobial pharmacy particularly around the dose optimisation angle                                                                                                                                      |
| likely to involve discussion on a case by case basis rather than a regular MDT                                                                                                                                                                                         |
| MDT is advisable for any uncommon and potentially serious condition in principle.                                                                                                                                                                                      |
| Utilise each specialty, but a formal MDT is not essential. I would be concerned if the outcome said it can only be managed by MDT                                                                                                                                      |
| we have done this by joining up a series of two way conversations in the past. virtual platforms it will facilitate mdts within and between centres                                                                                                                    |
